# Supplementary material for: Predictable electronic tuning of FeII and RuII complexes via choice of azine: correlation of ligand pKa with Epa(MIII/II) of complex
Source: Royal Society of Chemistry journal article supplement (doi:10.1039/d3dt03484d), 2023-12-20
Supplement: d3dt03484d2.pdf [file d3dt03484d2.pdf]

# Electronic Supporting Information

## Predictable Electronic Tuning of Fe<sup>II</sup> and Ru<sup>II</sup> Complexes via Choice of Azine: Correlation of Ligand pK<sub>a</sub> with E<sub>pa</sub>(M<sup>III/II</sup>) of Complex

Matthew G. Robb,<sup>a</sup> Luca Bondi,<sup>a</sup> Santiago Rodríguez-Jiménez,<sup>a</sup> Anna L. Garden,<sup>a</sup>  
Paul Jerabek\*<sup>b</sup> and Sally Brooker\*<sup>a</sup>

<sup>a</sup> *Department of Chemistry and MacDiarmid Institute of Advanced Materials and  
Nanotechnology, University of Otago, P.O. Box 56, Dunedin 9054, New Zealand, E-mail:  
[sbrooker@chemistry.otago.ac.nz](mailto:sbrooker@chemistry.otago.ac.nz)*

<sup>b</sup> *Institute of Hydrogen Technology, Helmholtz Zentrum Hereon, Max Planck-Straße 1, 21502  
Geesthacht, Germany*

# Table of Contents

|                                                                                                                                                                 |     |
|-----------------------------------------------------------------------------------------------------------------------------------------------------------------|-----|
| Single Crystal X-Ray Data .....                                                                                                                                 | S1  |
| Additional X-ray crystal structure determination details .....                                                                                                  | S2  |
| Mass Spectra of the complexes .....                                                                                                                             | S6  |
| [Ru(L <sup>pyridine</sup> ) <sub>3</sub> ](PF <sub>6</sub> ) <sub>2</sub> .....                                                                                 | S6  |
| [Ru(L <sup>pyrazine</sup> ) <sub>3</sub> ](PF <sub>6</sub> ) <sub>2</sub> .....                                                                                 | S7  |
| [Ru(L <sup>4-pyrimidine</sup> ) <sub>3</sub> ](PF <sub>6</sub> ) <sub>2</sub> .....                                                                             | S8  |
| [Ru(L <sup>2-pyrimidine</sup> ) <sub>3</sub> ](PF <sub>6</sub> ) <sub>2</sub> .....                                                                             | S9  |
| [Ru(L <sup>pyridazine</sup> ) <sub>3</sub> ](PF <sub>6</sub> ) <sub>2</sub> .....                                                                               | S10 |
| Electrochemistry .....                                                                                                                                          | S11 |
| Tabulated values of redox potentials .....                                                                                                                      | S13 |
| UV-Vis Spectroscopy .....                                                                                                                                       | S15 |
| Density Functional Theory Calculations – Orca 4.0.1 .....                                                                                                       | S20 |
| Tabulated electronic energy and molecular orbital energy values for [Ru <sup>II</sup> (L <sup>azine</sup> ) <sub>3</sub> ](PF <sub>6</sub> ) <sub>2</sub> ..... | S21 |
| Plots of HOMO Energies versus E <sub>m</sub> at Varying Scan Rates .....                                                                                        | S22 |
| Density Functional Theory Calculations – Orca 5.0.3 .....                                                                                                       | S26 |
| Perspective view of the HOMO of the mer complexes calculated with Orca 5.0.3 .....                                                                              | S29 |
| Ionisation Potentials .....                                                                                                                                     | S34 |
| DFT Calculations on the Ligands .....                                                                                                                           | S38 |
| Initial Calculations on the Heterocycles .....                                                                                                                  | S38 |
| Ligand Calculations using B3LYP .....                                                                                                                           | S42 |
| NMR Spectra of the Complexes .....                                                                                                                              | S45 |
| [Ru(L <sup>pyridine</sup> ) <sub>3</sub> ](PF <sub>6</sub> ) <sub>2</sub> (1) .....                                                                             | S45 |
| [Ru(L <sup>pyridazine</sup> ) <sub>3</sub> ](PF <sub>6</sub> ) <sub>2</sub> (2) .....                                                                           | S48 |
| [Ru(L <sup>4-pyrimidine</sup> ) <sub>3</sub> ](PF <sub>6</sub> ) <sub>2</sub> (3) .....                                                                         | S52 |
| [Ru(L <sup>pyrazine</sup> ) <sub>3</sub> ](PF <sub>6</sub> ) <sub>2</sub> (4) .....                                                                             | S55 |
| [Ru(L <sup>2-pyrimidine</sup> ) <sub>3</sub> ](PF <sub>6</sub> ) <sub>2</sub> (5) .....                                                                         | S58 |
| References .....                                                                                                                                                | S61 |

## Single Crystal X-Ray Data

Table S1: Selected crystallographic data for complexes [Ru(L<sup>pyridine</sup>)<sub>3</sub>](PF<sub>6</sub>)<sub>2</sub>, [Ru(L<sup>4-pyrimidine</sup>)<sub>3</sub>](PF<sub>6</sub>)<sub>2</sub> and [Ru(L<sup>pyrazine</sup>)<sub>3</sub>](PF<sub>6</sub>)<sub>2</sub> (Cambridge Structural Database CCDC 2250256 – 2250258).

|                                             | [Ru(L <sup>pyridine</sup> ) <sub>3</sub> ](PF <sub>6</sub> ) <sub>2</sub><br>·2MeCN·Et <sub>2</sub> O | [Ru(L <sup>4-pyrimidine</sup> ) <sub>3</sub> ](PF <sub>6</sub> ) <sub>2</sub><br>·2MeCN·Et <sub>2</sub> O | [Ru(L <sup>pyrazine</sup> ) <sub>3</sub> ](PF <sub>6</sub> ) <sub>2</sub><br>·2MeCN |
|---------------------------------------------|-------------------------------------------------------------------------------------------------------|-----------------------------------------------------------------------------------------------------------|-------------------------------------------------------------------------------------|
|                                             | 1 · 2MeCN·Et <sub>2</sub> O                                                                           | 3 · 2MeCN·Et <sub>2</sub> O                                                                               | 4 · 2MeCN                                                                           |
| CCDC #                                      | 2250556                                                                                               | 2250257                                                                                                   | 2250257                                                                             |
| Empirical formula                           | C <sub>64</sub> H <sub>54</sub> F <sub>12</sub> N <sub>14</sub> P <sub>2</sub> Ru                     | C <sub>57</sub> H <sub>45</sub> F <sub>12</sub> N <sub>15</sub> P <sub>2</sub> Ru                         | C <sub>61</sub> H <sub>51</sub> F <sub>12</sub> N <sub>17</sub> P <sub>2</sub> Ru   |
| Formula weight                              | 1410.22                                                                                               | 1331.09                                                                                                   | 1413.19                                                                             |
| Temperature/K                               | 100.15                                                                                                | 100.01(10)                                                                                                | 100.01(10)                                                                          |
| Crystal system                              | triclinic                                                                                             | triclinic                                                                                                 | monoclinic                                                                          |
| Space group                                 | P-1                                                                                                   | P-1                                                                                                       | P2 <sub>1</sub> /c                                                                  |
| a/Å                                         | 14.3806(6)                                                                                            | 14.4360(10)                                                                                               | 18.2893(5)                                                                          |
| b/Å                                         | 16.2266(5)                                                                                            | 16.0577(10)                                                                                               | 17.5489(6)                                                                          |
| c/Å                                         | 17.3781(5)                                                                                            | 17.3704(12)                                                                                               | 18.9097(6)                                                                          |
| α/°                                         | 102.239(3)                                                                                            | 103.299(6)                                                                                                | 90                                                                                  |
| β/°                                         | 112.933(3)                                                                                            | 112.553(7)                                                                                                | 95.352(3)                                                                           |
| γ/°                                         | 105.195(3)                                                                                            | 105.024(6)                                                                                                | 90                                                                                  |
| Volume/Å <sup>3</sup>                       | 3371.5(2)                                                                                             | 3337.6(4)                                                                                                 | 6042.7(3)                                                                           |
| Z                                           | 2                                                                                                     | 2                                                                                                         | 4                                                                                   |
| ρ <sub>calc</sub> /cm <sup>3</sup>          | 1.389                                                                                                 | 1.325                                                                                                     | 1.553                                                                               |
| μ/mm <sup>-1</sup>                          | 3.052                                                                                                 | 3.055                                                                                                     | 3.422                                                                               |
| F(000)                                      | 1436                                                                                                  | 1348                                                                                                      | 2872                                                                                |
| Crystal size/mm <sup>3</sup>                | 0.679 × 0.125 × 0.045                                                                                 | 0.189 × 0.1 × 0.029                                                                                       | 0.09 × 0.05 × 0.009                                                                 |
| Radiation                                   | Cu Kα (λ = 1.54184)                                                                                   | Cu Kα (λ = 1.54184)                                                                                       | Cu Kα (λ = 1.54184)                                                                 |
| 2θ range for data collection/°              | 7.226 to 145.624                                                                                      | 7.19 to 153.366                                                                                           | 8.17 to 152.594                                                                     |
| Index ranges                                | -17 ≤ h ≤ 17, -18 ≤ k ≤ 19, -21 ≤ l ≤ 15                                                              | -17 ≤ h ≤ 18, -20 ≤ k ≤ 16, -21 ≤ l ≤ 19                                                                  | -22 ≤ h ≤ 23, -20 ≤ k ≤ 21, -23 ≤ l ≤ 16                                            |
| Reflections collected                       | 24603                                                                                                 | 27976                                                                                                     | 35206                                                                               |
| Independent reflections                     | 12926 [R <sub>int</sub> = 0.0376, R <sub>sigma</sub> = 0.0392]                                        | 13638 [R <sub>int</sub> = 0.0688, R <sub>sigma</sub> = 0.0843]                                            | 12393 [R <sub>int</sub> = 0.1303, R <sub>sigma</sub> = 0.1339]                      |
| Data/restraints/parameter                   | 12926/252/910                                                                                         | 13638/0/787                                                                                               | 12393/0/843                                                                         |
| Goodness-of-fit on F <sup>2</sup>           | 1.064                                                                                                 | 1.112                                                                                                     | 0.973                                                                               |
| Final R indexes [I >= 2σ (I)]               | R <sub>1</sub> = 0.0598, wR <sub>2</sub> = 0.1615                                                     | R <sub>1</sub> = 0.0967, wR <sub>2</sub> = 0.2727                                                         | R <sub>1</sub> = 0.0741, wR <sub>2</sub> = 0.1736                                   |
| Final R indexes [all data]                  | R <sub>1</sub> = 0.0651, wR <sub>2</sub> = 0.1662                                                     | R <sub>1</sub> = 0.1240, wR <sub>2</sub> = 0.3036                                                         | R <sub>1</sub> = 0.1173, wR <sub>2</sub> = 0.1992                                   |
| Largest diff. peak/hole / e Å <sup>-3</sup> | 1.32/-0.91                                                                                            | 2.00/-1.02                                                                                                | 1.66/-1.27                                                                          |

## Additional X-ray crystal structure determination details

Complex  $[\text{Ru}(\text{L}^{\text{pyridine}})_3](\text{PF}_6)_2 \cdot 2\text{MeCN} \cdot \text{Et}_2\text{O}$  ( $1 \cdot 2\text{MeCN} \cdot \text{Et}_2\text{O}$ ) crystallises in the triclinic P-1 space group. A whole complex is found in the asymmetric unit along with two solvent acetonitrile molecules and a diethyl ether molecule. Due to disorder in the lattice the diethyl ether solvent molecule could not be satisfactorily modelled and as such a solvent mask was applied (SQUEEZE through Platon).<sup>1, 2</sup> The residual electron density removed from the unit cell unit was equivalent to  $80 e^-$  ( $V = 414 \text{ \AA}^3$ ) which is consistent with the removal of two diethyl ether molecules from the unit cell unit ( $84 e^-$ ).

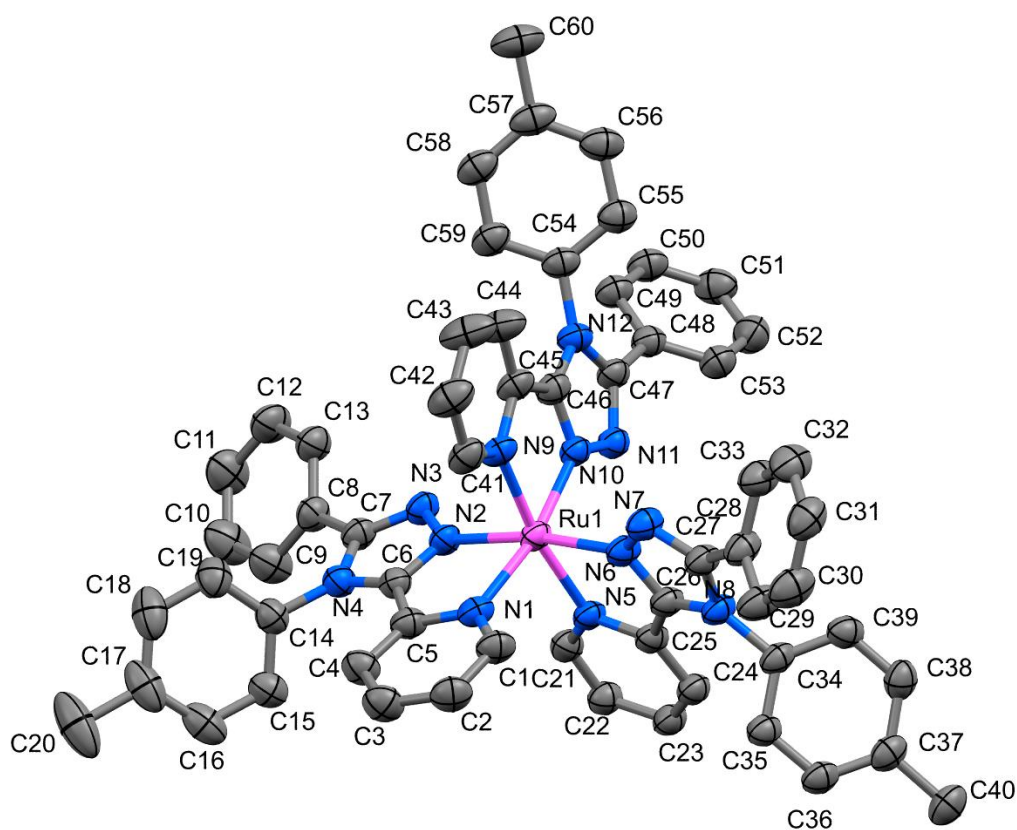

Figure S1: The cation of  $[\text{Ru}(\text{L}^{\text{pyridine}})_3](\text{PF}_6)_2 \cdot 2\text{MeCN} \cdot \text{Et}_2\text{O}$  ( $1 \cdot 2\text{MeCN} \cdot \text{Et}_2\text{O}$ ), with anions, solvents and hydrogen atoms omitted for clarity.

Complex  $[\text{Ru}(\text{L}^{4\text{-pyrimidine}})_3](\text{PF}_6)_2 \cdot 2\text{MeCN} \cdot \text{Et}_2\text{O}$  ( $3 \cdot 2\text{MeCN} \cdot \text{Et}_2\text{O}$ ) crystallises in the triclinic P-1 space group. A whole complex is found in the asymmetric unit along with some disordered solvent molecules. Due to disorder in the lattice the solvent molecules could not be satisfactorily modelled and as such a solvent mask was applied (through SQUEEZE in PLATON).<sup>1,2</sup> The residual electron density removed from the asymmetric unit was equivalent to  $171 e^-$  ( $V = 772 \text{ \AA}^3$ ) which is consistent with the removal of four acetonitrile molecules and two diethyl ether molecules from the unit cell ( $172 e^-$ ).

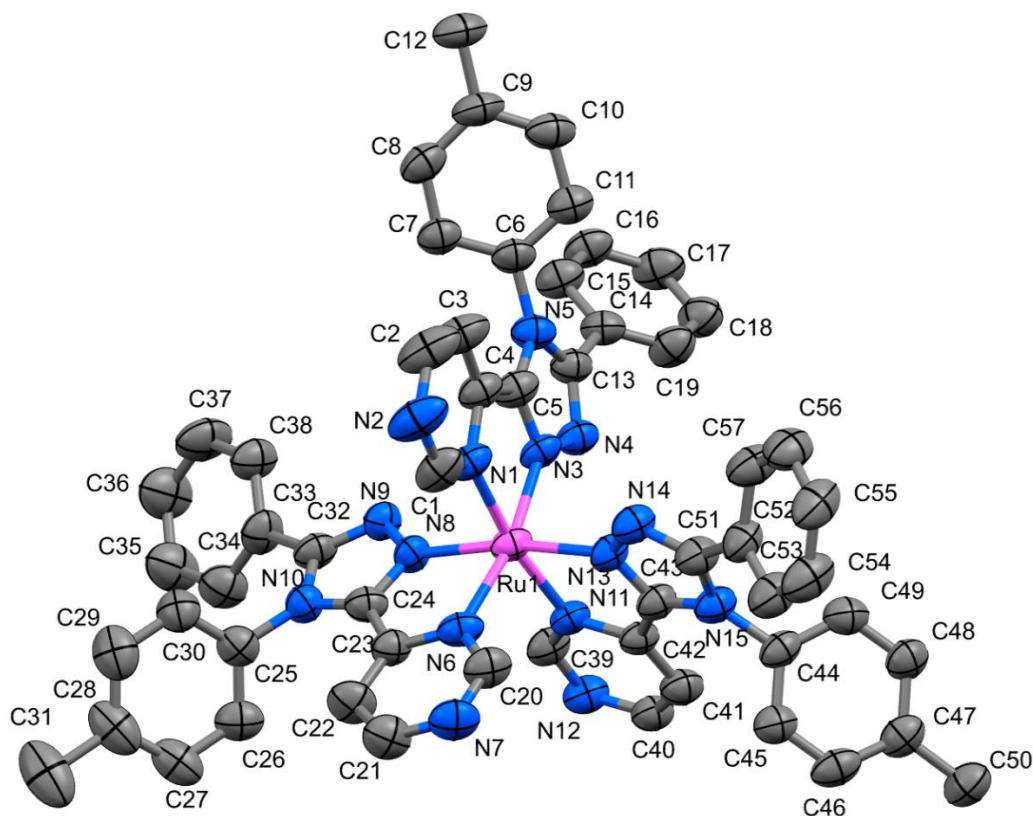

Figure S2: The cation of  $[\text{Ru}(\text{L}^{4\text{-pyrimidine}})_3](\text{PF}_6)_2 \cdot 2\text{MeCN} \cdot \text{Et}_2\text{O}$  ( $3 \cdot 2\text{MeCN} \cdot \text{Et}_2\text{O}$ ) with solvents, counterions and hydrogen atoms omitted for clarity.

Complex  $[\text{Ru}(\text{L}^{\text{pyrazine}})_3](\text{PF}_6)_2 \cdot 2\text{MeCN}$  (**4**·2MeCN) crystallises in  $P2_1/c$  with one complex and two acetonitrile molecules in the asymmetric unit.

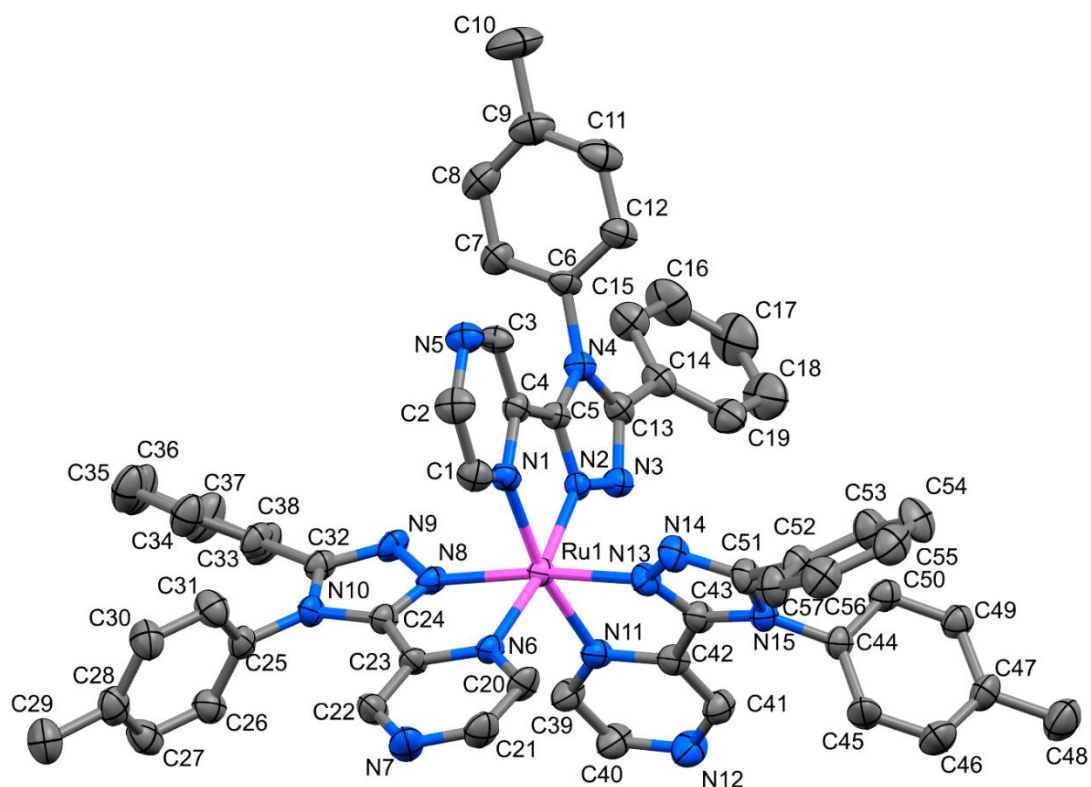

Figure S3: The cation of  $[\text{Ru}(\text{L}^{\text{pyrazine}})_3](\text{PF}_6)_2 \cdot 2\text{MeCN}$  (**4**·2MeCN) with counterions, solvent of crystallisation and hydrogen atoms omitted for clarity.

In all three cases, the complex cations are isostructural (Figure S4), with the  $\text{Ru}^{\text{II}}$  centre bound in an octahedral  $\text{N}_6$  coordination sphere composed of 3  $\text{L}^{\text{azine}}$  ligands bound in a bidentate manner. Notably the complexes crystallise as the meridional isomer, with both  $\Delta$  and  $\Lambda$  stereoisomers in the crystal structure. Some key parameters are shown in Table S2.

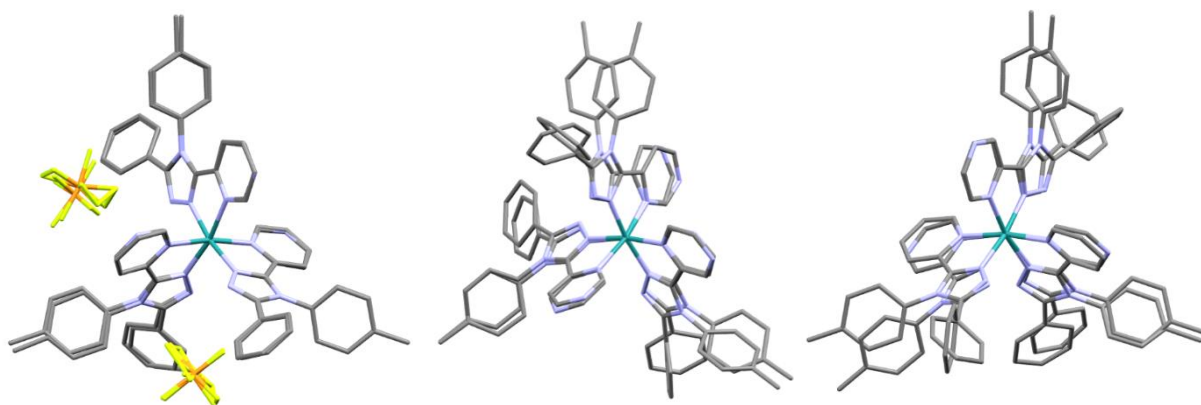

Figure S4: Overlay of crystal structures of **1** · 2MeCN · Et<sub>2</sub>O and **3** · 2MeCN · Et<sub>2</sub>O (left), **4** · 2MeCN and **3** · 2MeCN · Et<sub>2</sub>O (centre) and **1** · 2MeCN · Et<sub>2</sub>O and **4** · 2MeCN (right). Solvent, counter ions and hydrogens omitted for clarity. Generated with Mercury.<sup>3</sup>

Table S2: Key structural data (averages in blue italics in brackets).

|                  | [Ru(L <sup>pyridine</sup> ) <sub>3</sub> ](PF <sub>6</sub> ) <sub>2</sub><br>· 2MeCN · Et <sub>2</sub> O<br>(4 · 2MeCN · Et <sub>2</sub> O) | [Ru(L <sup>4-pyrimidine</sup> ) <sub>3</sub> ](PF <sub>6</sub> ) <sub>2</sub><br>· 2MeCN · Et <sub>2</sub> O<br>(4 · 2MeCN · Et <sub>2</sub> O) | [Ru(L <sup>pyrazine</sup> ) <sub>3</sub> ](PF <sub>6</sub> ) <sub>2</sub><br>· 2MeCN<br>(4 · 2MeCN) |
|------------------|---------------------------------------------------------------------------------------------------------------------------------------------|-------------------------------------------------------------------------------------------------------------------------------------------------|-----------------------------------------------------------------------------------------------------|
| Crystal system   | Triclinic                                                                                                                                   | Triclinic                                                                                                                                       | Monoclinic                                                                                          |
| Space group      | P-1                                                                                                                                         | P-1                                                                                                                                             | P2 <sub>1</sub> /c                                                                                  |
| Z                | 2                                                                                                                                           | 2                                                                                                                                               | 4                                                                                                   |
| Ru-triazole / Å  | 2.035(3),<br>2.044(3),<br>2.034(3)<br><i>(2.037)</i>                                                                                        | 2.015(5),<br>2.069(5),<br>2.048(5)<br><i>(2.044)</i>                                                                                            | 2.048(5),<br>2.075(5),<br>2.036(4)<br><i>(2.052)</i>                                                |
| Ru-azine / Å     | 2.077(3),<br>2.075(3),<br>2.083(3)<br><i>(2.0783)</i>                                                                                       | 2.068(5),<br>2.070(6),<br>2.068(6)<br><i>(2.069)</i>                                                                                            | 2.055(5),<br>2.067(5),<br>2.073(4)<br><i>(2.066)</i>                                                |
| Σ / °            | 74.04                                                                                                                                       | 76.8                                                                                                                                            | 78.5                                                                                                |
| Azine twist / °  | 4.63,<br>6.21,<br>11.84<br><i>(7.56)</i>                                                                                                    | 2.19,<br>9.82,<br>3.41<br><i>(5.14)</i>                                                                                                         | 4.33,<br>8.26,<br>13.27<br><i>(8.62)</i>                                                            |
| Phenyl twist / ° | 38.07,<br>49.26,<br>46.60<br><i>(44.64)</i>                                                                                                 | 39.91,<br>46.35,<br>47.21<br><i>(44.49)</i>                                                                                                     | 44.81,<br>37.90,<br>53.78<br><i>(45.50)</i>                                                         |
| Tolyl twist / °  | 72.10,<br>7.79,<br>60.97<br><i>(66.95)</i>                                                                                                  | 72.00,<br>59.29,<br>70.96<br><i>(67.42)</i>                                                                                                     | 76.98,<br>85.60,<br>84.12<br><i>(82.23)</i>                                                         |

## Mass Spectra of the complexes

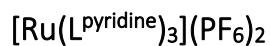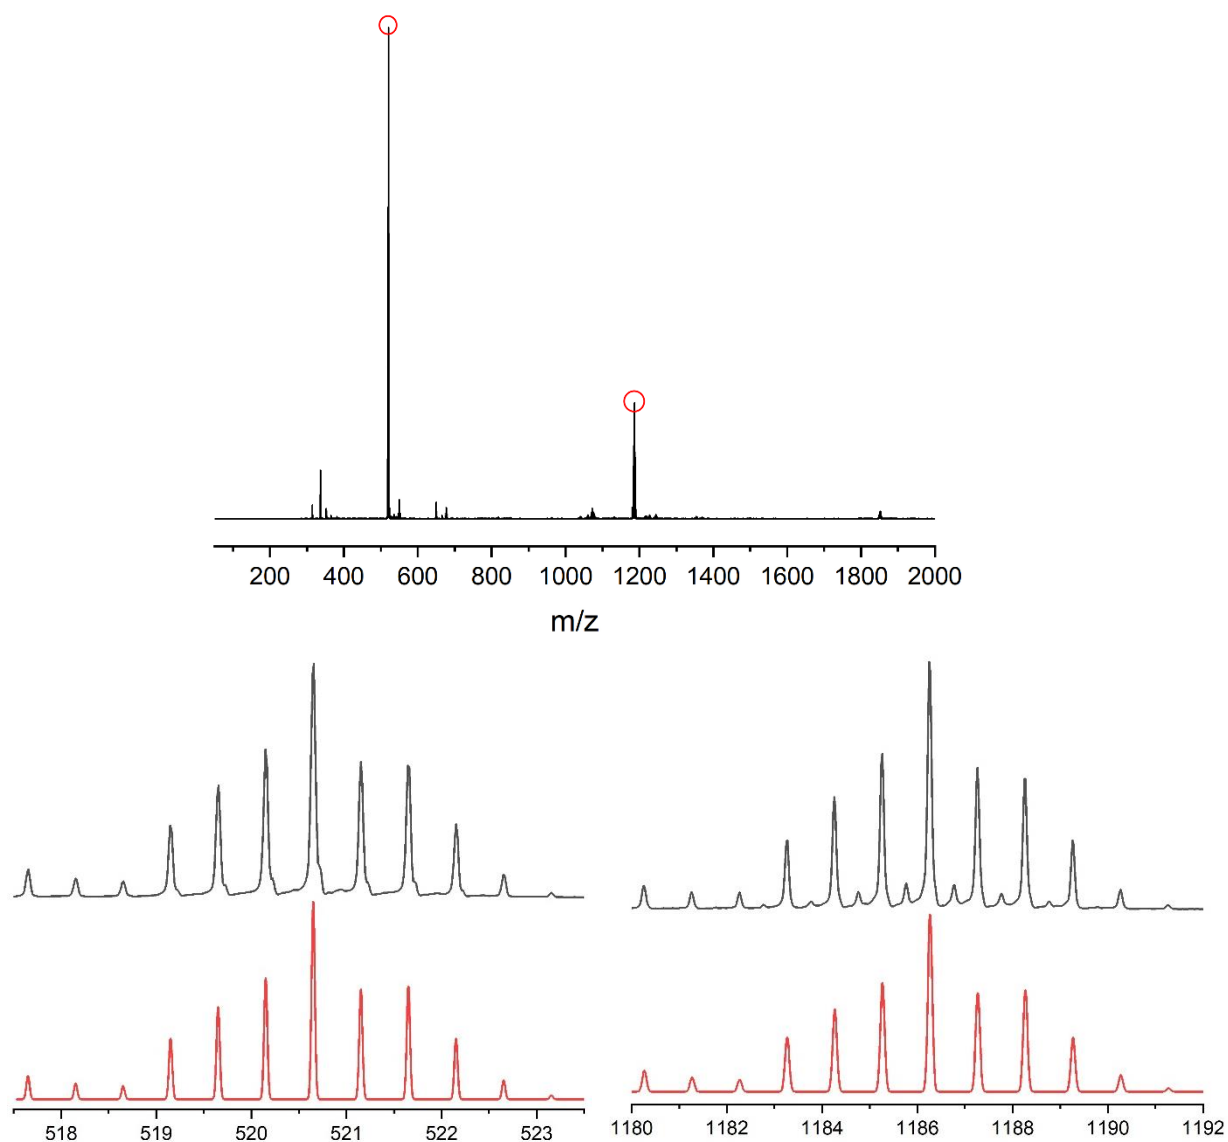

Figure S5: Mass spectrum of  $[\text{Ru}(\text{L}^{\text{pyridine}})_3](\text{PF}_6)_2$ . Top shows full spectrum, bottom left shows  $[\text{Ru}(\text{L}^{\text{pyridine}})_3]^{2+}$  fit (calculated in red, found in black), bottom right shows  $[\text{Ru}(\text{L}^{\text{pyridine}})_3](\text{PF}_6)^+$  fit (calculated in red, found in black).



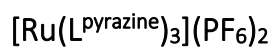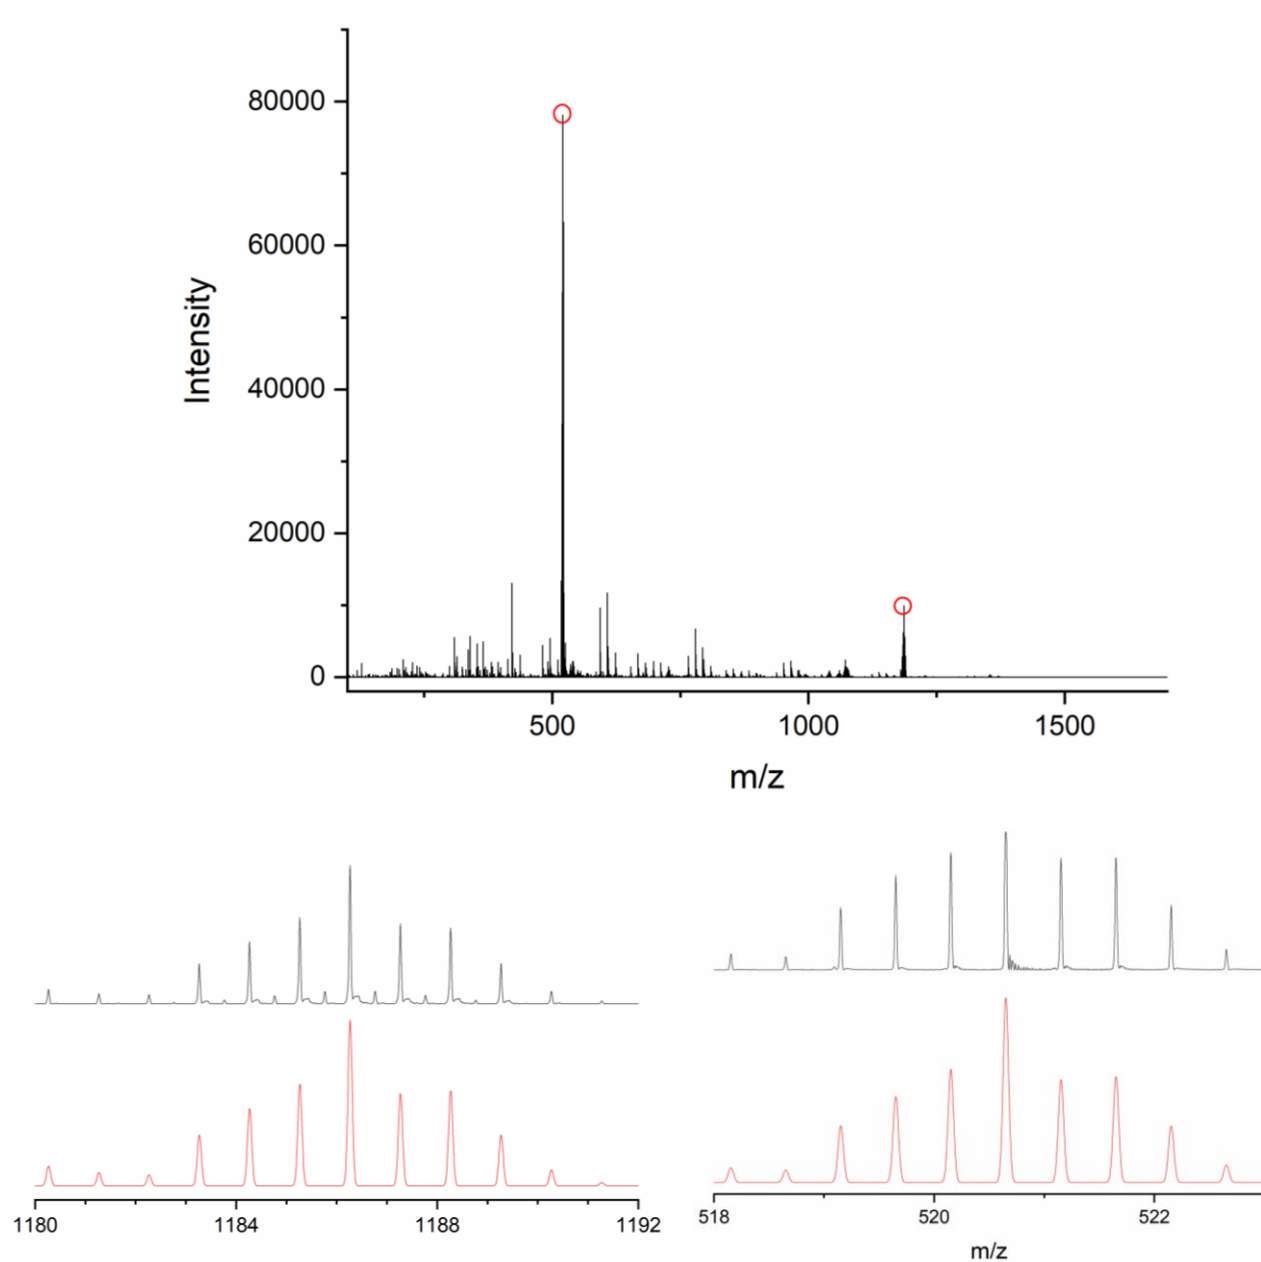

Figure S6: Mass spectrum of  $[\text{Ru}(\text{L}^{\text{pyrazine}})_3](\text{PF}_6)_2$ . Top shows full spectrum, bottom left shows calculated fit of  $[\text{Ru}(\text{L}^{\text{pyrazine}})_3]^{2+}$  in red, found in black, bottom right shows calculated fit of  $[\text{Ru}(\text{L}^{\text{pyrazine}})_3](\text{PF}_6)^+$  in red, found in black.

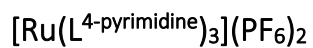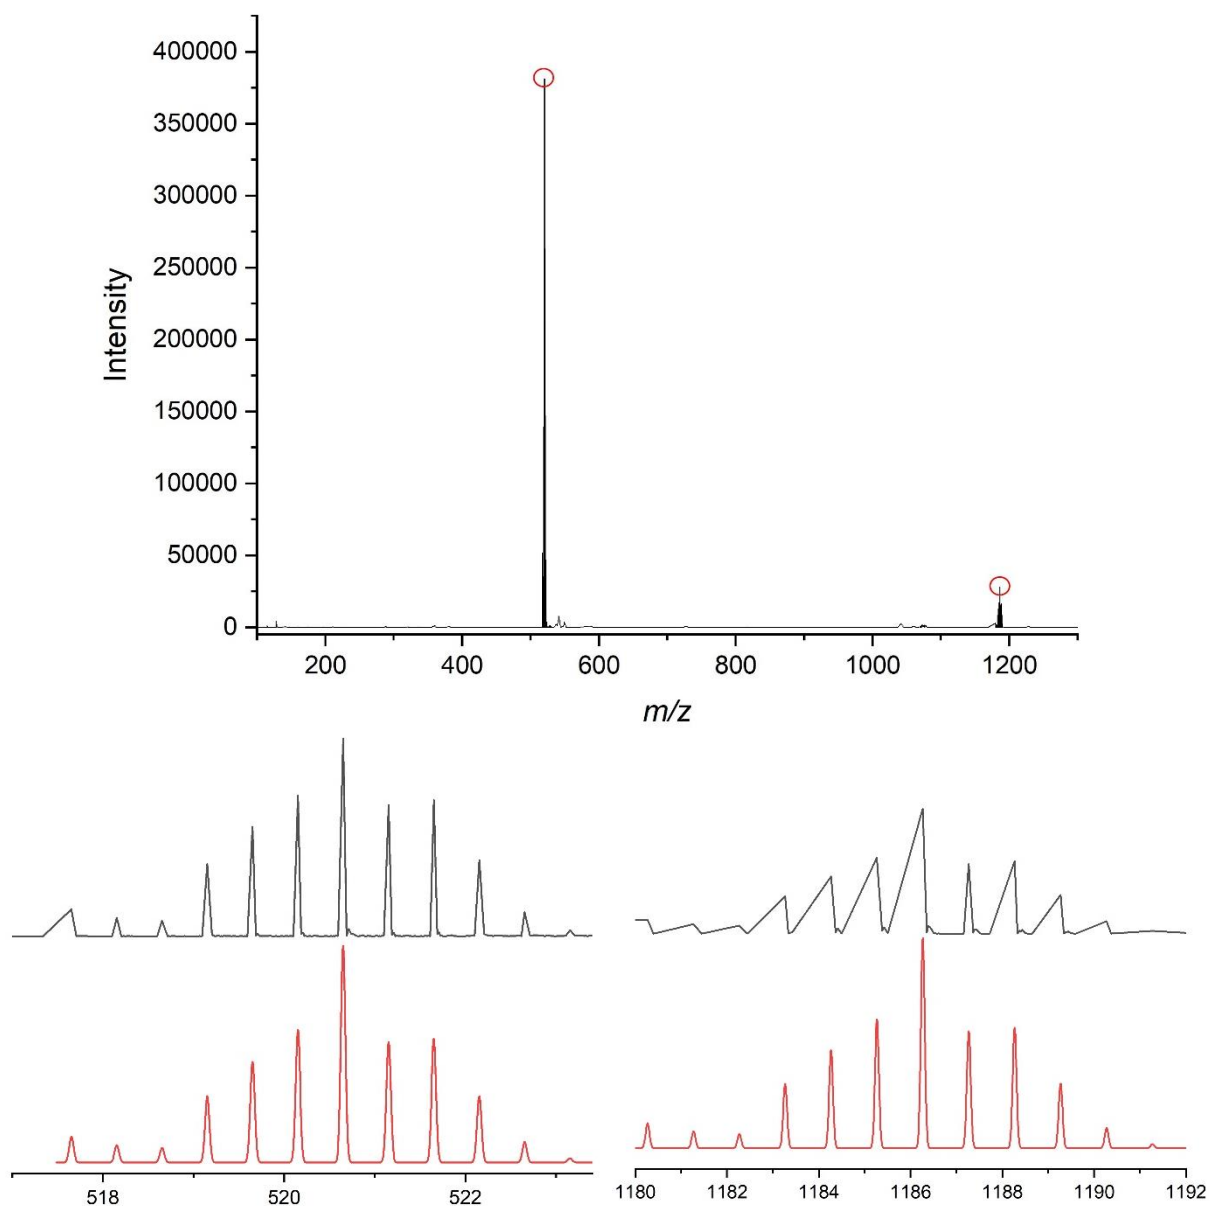

Figure S7: Mass spectrum of  $[\text{Ru}(\text{L}^{4\text{-pyrimidine}})_3](\text{PF}_6)_2$ . Top shows full spectrum, bottom left shows calculated fit of  $[\text{Ru}(\text{L}^{4\text{-pyrimidine}})_3]^{2+}$  in red, found in black, bottom right shows calculated fit of  $[\text{Ru}(\text{L}^{4\text{-pyrimidine}})_3](\text{PF}_6)^+$  in red, found in black.

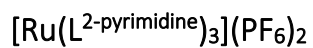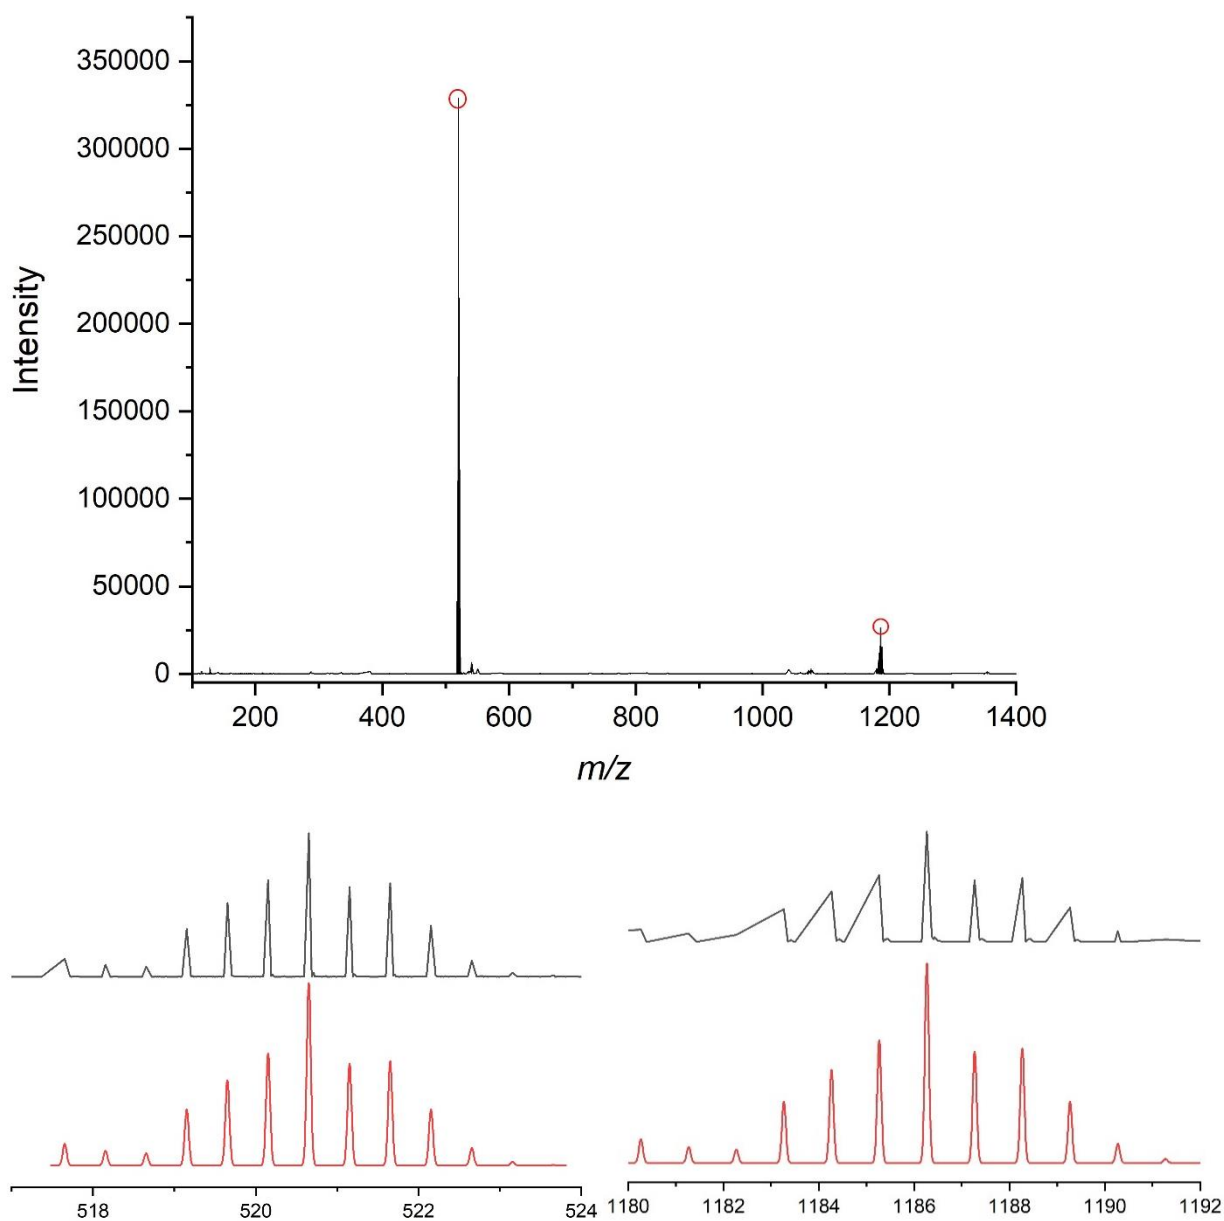

Figure S8: Mass spectrum of  $[\text{Ru}(\text{L}^{2\text{-pyrimidine}})_3](\text{PF}_6)_2$ . Top shows full spectrum, bottom left shows calculated fit of  $[\text{Ru}(\text{L}^{2\text{-pyrimidine}})_3]^{2+}$  in red, found in black, bottom right shows calculated fit of  $[\text{Ru}(\text{L}^{2\text{-pyrimidine}})_3](\text{PF}_6)^+$  in red, found in black.

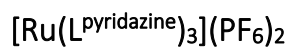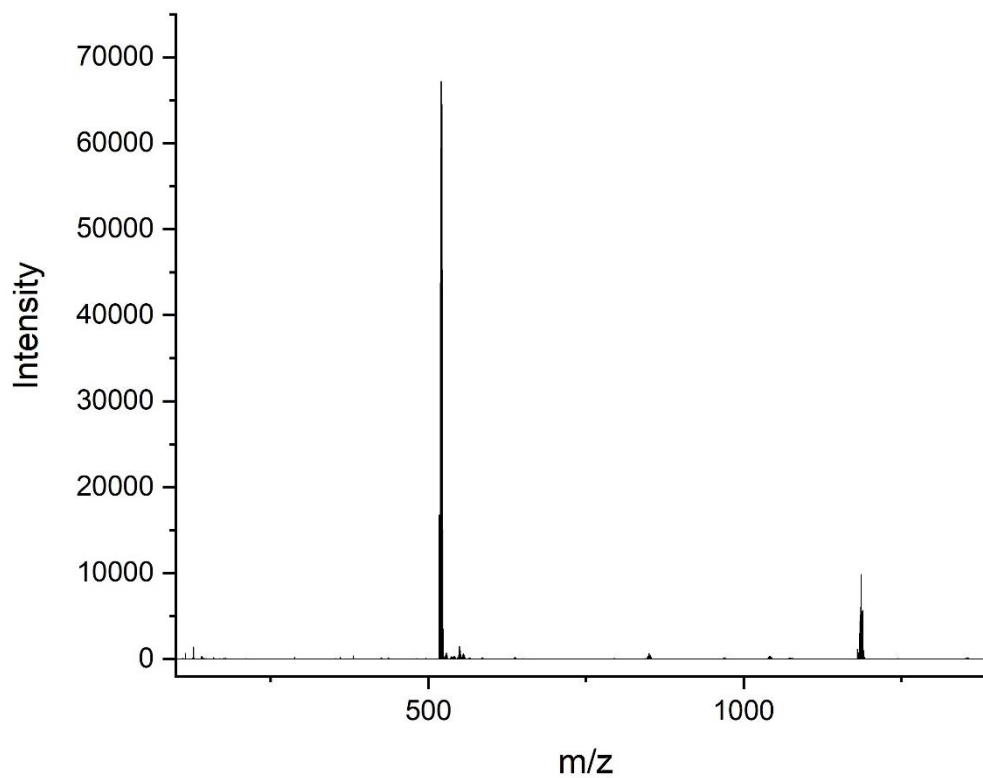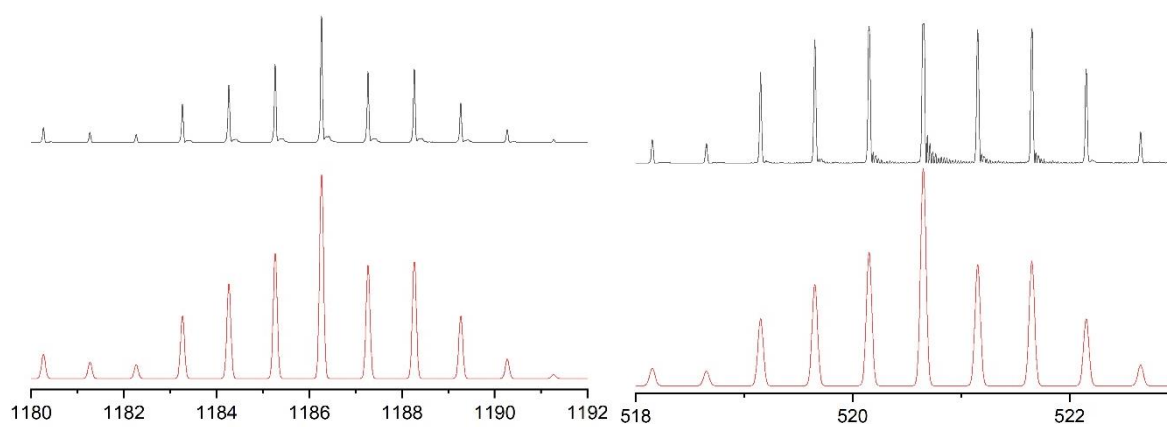

Figure S9: Mass spectrum of  $[\text{Ru}(\text{L}^{\text{pyridazine}})_3](\text{PF}_6)_2$ . Top shows full spectrum, bottom left shows calculated fit of  $[\text{Ru}(\text{L}^{\text{pyridazine}})_3]^{2+}$  in red, found in black, bottom right shows calculated fit of  $[\text{Ru}(\text{L}^{\text{pyridazine}})_3](\text{PF}_6)^+$  in red, found in black.

## Electrochemistry

In all cases freshly distilled (over CaH) acetonitrile was used, with the studied solutions containing 0.66 M of the appropriate  $[\text{Ru}(\text{L}^{\text{azine}})_3](\text{PF}_6)_2$  complex. The supporting electrolyte was 0.1 M TBAPF<sub>6</sub>. The  $\text{Fc}^{+/0}$  redox event was consistently observed at  $E_m(\Delta E)$  0.07(0.08) V, versus the 0.01 M  $\text{AgNO}_3/\text{Ag}$  reference electrode.

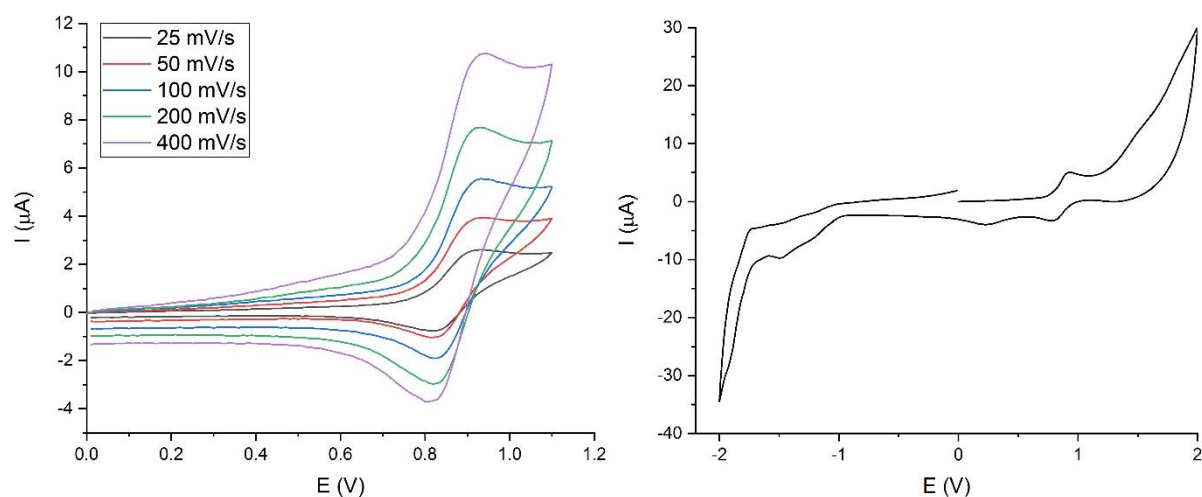

Figure S10: Cyclic voltammograms of 0.66 M  $[\text{Ru}(\text{L}^{\text{pyridine}})_3](\text{PF}_6)_2$  in MeCN with 0.1 M TBAPF<sub>6</sub> (left) scan rate study and (right) full range. Potentials are versus 0.01 M  $\text{AgNO}_3/\text{Ag}$ .

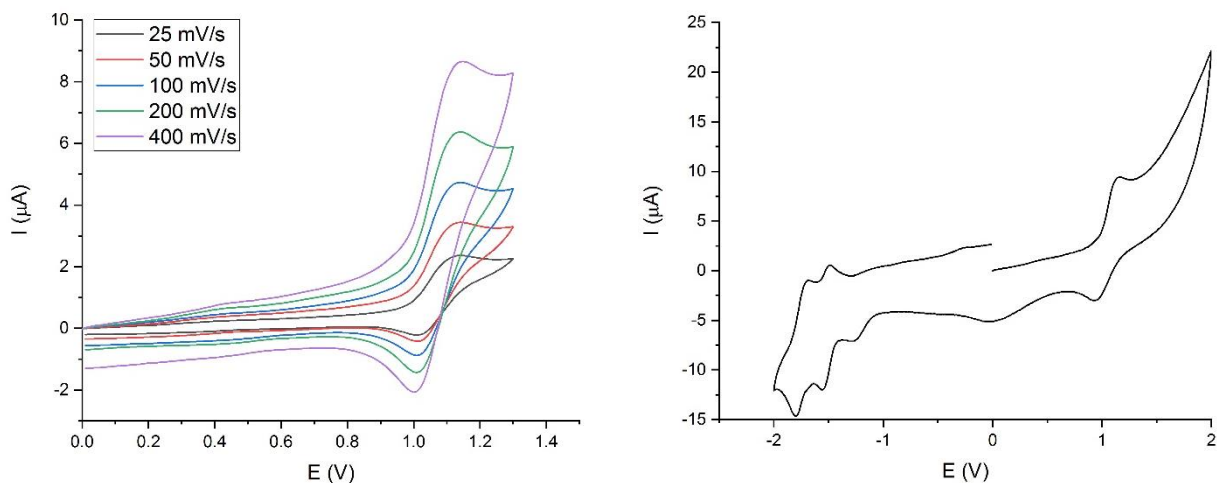

Figure S11: Cyclic voltammograms of 0.66 M  $[\text{Ru}(\text{L}^{\text{pyridazine}})_3](\text{PF}_6)_2$  in MeCN with 0.1 M TBAPF<sub>6</sub> (left) scan rate study and (right) full range at 400 mV/s. Potentials are versus 0.01 M  $\text{AgNO}_3/\text{Ag}$ .

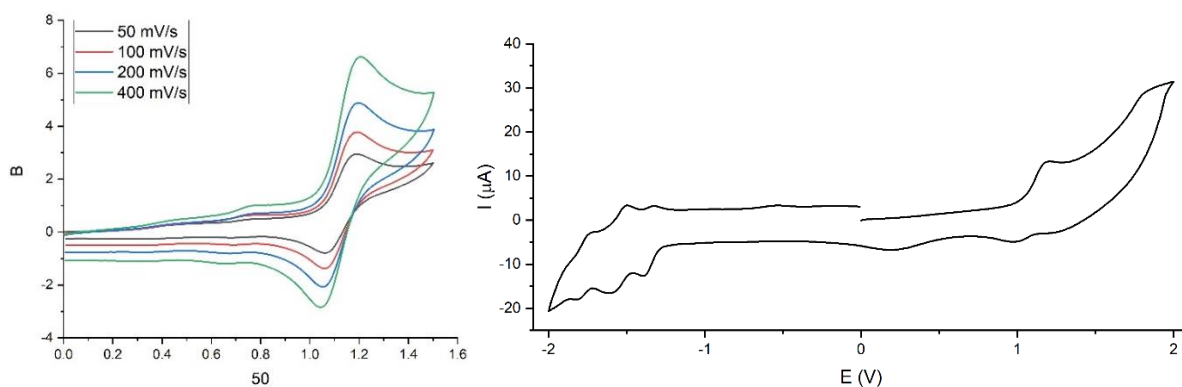

Figure S12: Cyclic voltammograms of 0.66 M  $[\text{Ru}(\text{L}^4\text{-pyrimidine})_3](\text{PF}_6)_2$  in MeCN with 0.1 M TBAPF<sub>6</sub>; (left) scan rate study and (right) full range at 400 mV/s. Potential is versus 0.01 M AgNO<sub>3</sub>/Ag.

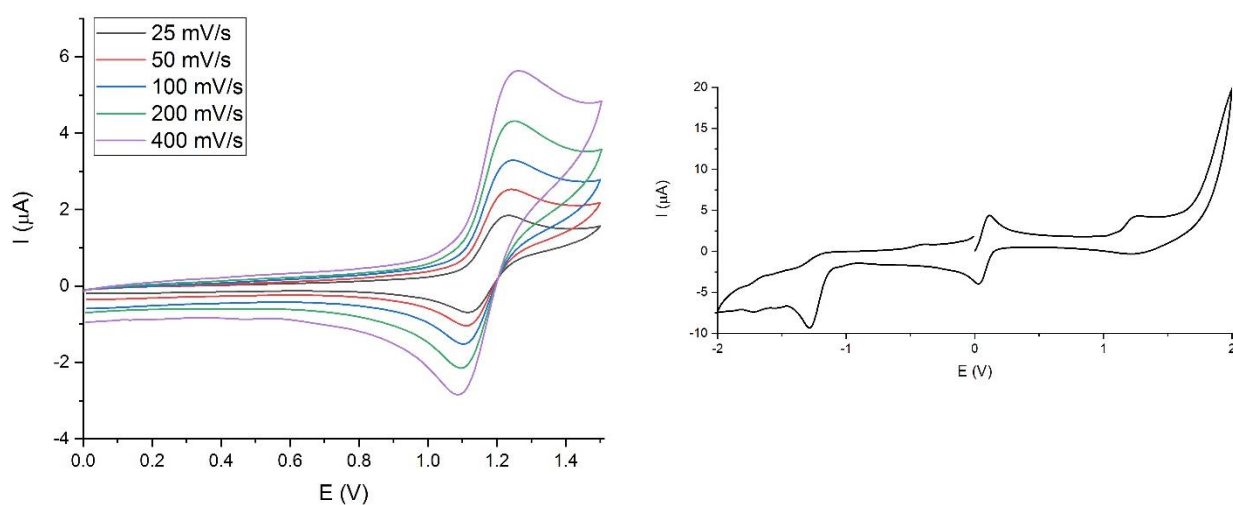

Figure S13: Cyclic voltammograms of 0.66 M  $[\text{Ru}(\text{L}^{\text{pyrazine}})_3](\text{PF}_6)_2$  in MeCN with 0.1 M TBAPF<sub>6</sub> (left) scan rate study and (right) full range at 100 mV/s with ferrocene internal reference. Potentials are versus 0.01 M AgNO<sub>3</sub>/Ag.

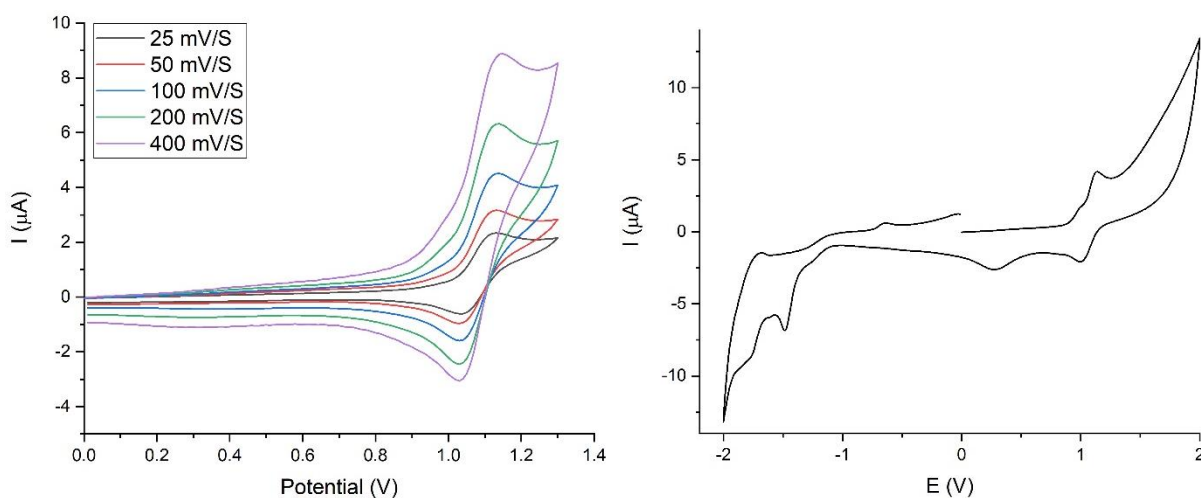

Figure S14: Cyclic voltammograms of 0.66 M  $[\text{Ru}(\text{L}^2\text{-pyrimidine})_3](\text{PF}_6)_2$  in MeCN with 0.1 M TBAPF<sub>6</sub> (left) scan rate study and (right) full range at 100 mV/s. Potentials are versus 0.01 M AgNO<sub>3</sub>/Ag.

## Tabulated values of redox potentials

Table S3: Oxidation, reduction and midpoint potentials for the Ru<sup>III/II</sup> process, at different scan rates for 0.66 M solutions of the ruthenium(II) tris-L<sup>azine</sup> hexafluorophosphate complexes, carried out in 0.1 M TBAPF<sub>6</sub> in dry acetonitrile, against a 0.01 M AgNO<sub>3</sub>/Ag reference.

| [RU(L <sup>4-PYRIDAZINE</sup> ) <sub>3</sub> ](PF <sub>6</sub> ) <sub>2</sub> |                     |                     |                     |                     |        |                    |
|-------------------------------------------------------------------------------|---------------------|---------------------|---------------------|---------------------|--------|--------------------|
| V / MV/S                                                                      | E <sub>PA</sub> (V) | I <sub>A</sub> (μA) | E <sub>PC</sub> (V) | I <sub>C</sub> (μA) | ΔE (V) | E <sub>M</sub> (V) |
| 400                                                                           | 1.14                | 6.36                | 0.94                | -2.93               | 0.20   | 1.04               |
| 200                                                                           | 1.11                | 4.98                | 0.96                | -2.41               | 0.15   | 1.04               |
| 100                                                                           | 1.12                | 3.87                | 0.97                | -1.30               | 0.15   | 1.05               |
| 50                                                                            | 1.12                | 2.71                | 0.98                | -0.78               | 0.14   | 1.05               |
| 25                                                                            | 1.12                | 2.09                | 0.99                | -0.25               | 0.13   | 1.06               |
| [RU(L <sup>4-PYRIMIDINE</sup> ) <sub>3</sub> ](PF <sub>6</sub> ) <sub>2</sub> |                     |                     |                     |                     |        |                    |
| V / MV/S                                                                      | E <sub>PA</sub> (V) | I <sub>A</sub> (μA) | E <sub>PC</sub> (V) | I <sub>C</sub> (μA) | ΔE (V) | E <sub>M</sub> (V) |
| 400                                                                           | 1.21                | 6.62                | 1.06                | -2.85               | 0.15   | 1.13               |
| 200                                                                           | 1.20                | 4.88                | 1.06                | -2.08               | 0.14   | 1.13               |
| 100                                                                           | 1.19                | 3.77                | 1.06                | -1.38               | 0.13   | 1.13               |
| 50                                                                            | 1.19                | 2.95                | 1.06                | -0.80               | 0.13   | 1.13               |
| [RU(L <sup>2-PYRAZINE</sup> ) <sub>3</sub> ](PF <sub>6</sub> ) <sub>2</sub>   |                     |                     |                     |                     |        |                    |
| V / MV/S                                                                      | E <sub>PA</sub> (V) | I <sub>A</sub> (μA) | E <sub>PC</sub> (V) | I <sub>C</sub> (μA) | ΔE (V) | E <sub>M</sub> (V) |
| 400                                                                           | 1.26                | 5.64                | 1.09                | -2.85               | 0.18   | 1.18               |
| 200                                                                           | 1.25                | 4.32                | 1.10                | -2.15               | 0.15   | 1.17               |
| 100                                                                           | 1.25                | 3.29                | 1.10                | -1.52               | 0.15   | 1.18               |
| 50                                                                            | 1.24                | 2.53                | 1.11                | -1.04               | 0.13   | 1.18               |
| 25                                                                            | 1.23                | 1.85                | 1.12                | -0.69               | 0.11   | 1.18               |
| [RU(L <sup>2-PYRIMIDINE</sup> ) <sub>3</sub> ](PF <sub>6</sub> ) <sub>2</sub> |                     |                     |                     |                     |        |                    |
| V / MV/S                                                                      | E <sub>PA</sub> (V) | I <sub>A</sub> (μA) | E <sub>PC</sub> (V) | I <sub>C</sub> (μA) | ΔE (V) | E <sub>M</sub> (V) |
| 400                                                                           | 1.15                | 8.89                | 1.03                | -3.06               | 0.12   | 1.09               |
| 200                                                                           | 1.14                | 6.32                | 1.03                | -2.45               | 0.11   | 1.09               |
| 100                                                                           | 1.14                | 4.51                | 1.03                | -1.59               | 0.11   | 1.09               |
| 50                                                                            | 1.13                | 3.17                | 1.03                | -0.96               | 0.1    | 1.08               |
| 25                                                                            | 1.13                | 2.34                | 1.03                | -0.61               | 0.1    | 1.08               |
| [RU(L <sup>2-PYRIDINE</sup> ) <sub>3</sub> ](PF <sub>6</sub> ) <sub>2</sub>   |                     |                     |                     |                     |        |                    |
| V / MV/S                                                                      | E <sub>PA</sub> (V) | I <sub>A</sub> (μA) | E <sub>PC</sub> (V) | I <sub>C</sub> (μA) | ΔE (V) | E <sub>M</sub> (V) |
| 400                                                                           | 0.93                | 10.76               | 0.81                | -3.71               | 0.13   | 0.87               |
| 200                                                                           | 0.93                | 7.68                | 0.82                | -2.97               | 0.11   | 0.88               |
| 100                                                                           | 0.93                | 5.55                | 0.83                | -1.90               | 0.10   | 0.88               |
| 50                                                                            | 0.94                | 3.94                | 0.82                | -1.03               | 0.12   | 0.88               |
| 25                                                                            | 0.93                | 2.60                | 0.82                | -0.76               | 0.11   | 0.88               |

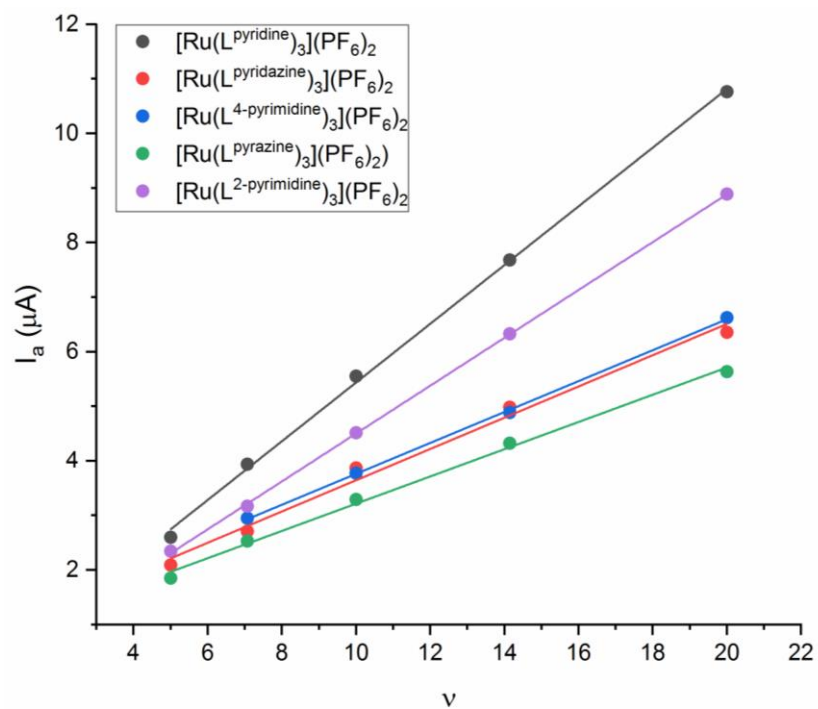

Figure S15: Plot of  $I_a$  against  $\sqrt{v}$  shows linear correlations for the  $\text{Ru}^{\text{III/II}}$  process for all five complexes.



## UV-Vis Spectroscopy

For completeness, UV-vis spectra were recorded in acetonitrile (Figure S16-S21). All five complexes show a strong absorbance in the visible, with  $\lambda_{\text{max}}$  in the range 437-464 nm and extinction coefficients in the range 9600-18000  $\text{M}^{-1}\text{cm}^{-1}$ . These are similar in energy and intensity to the simpler  $\text{Ru}^{\text{II}}$  tris-bipyridine and tris-diazine complexes,<sup>4-6</sup> and appear to show a similar trend in absorbance, although this is complicated by the overlapping bands in these spectra (Table S4).

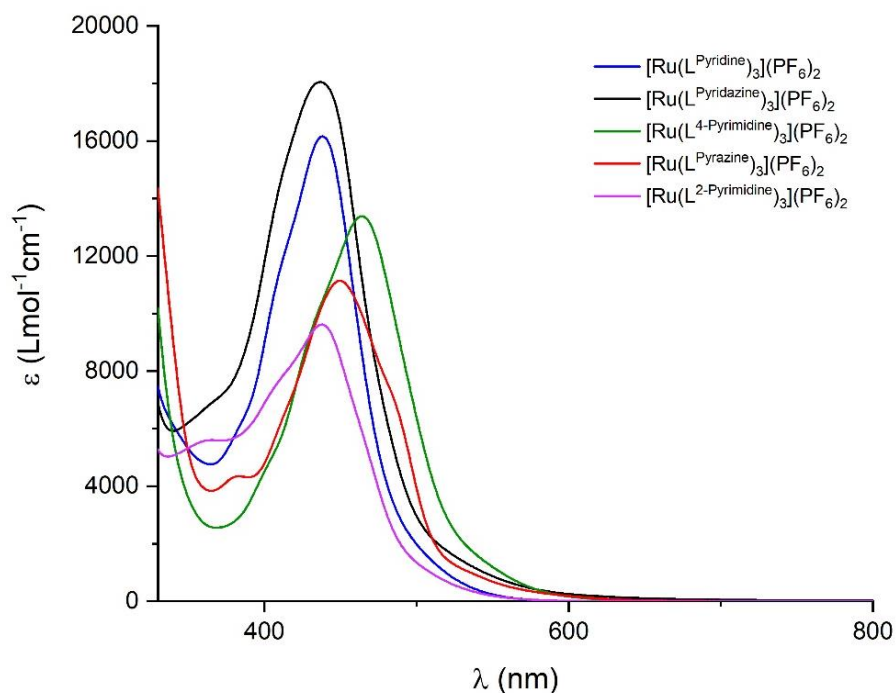

Figure S16: UV-Vis spectra of the five  $[\text{Ru}^{\text{II}}(\text{L}^{\text{azine}})_3](\text{PF}_6)_2$  complexes measured in acetonitrile.

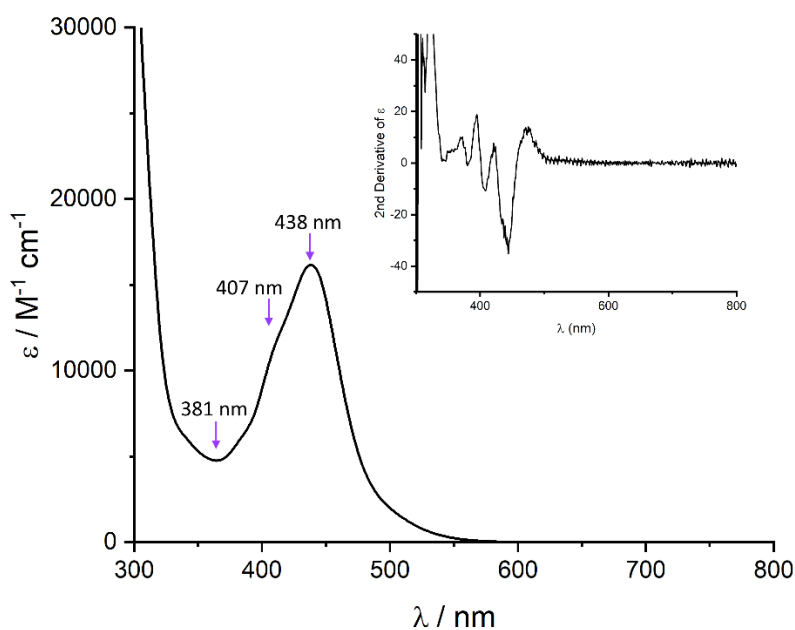

Figure S17: UV-Vis spectrum of  $[\text{Ru}^{\text{II}}(\text{L}^{\text{pyridine}})_3](\text{PF}_6)_2$  (**1**) measured in acetonitrile. Inset: 2<sup>nd</sup> Derivative of the extinction coefficient.

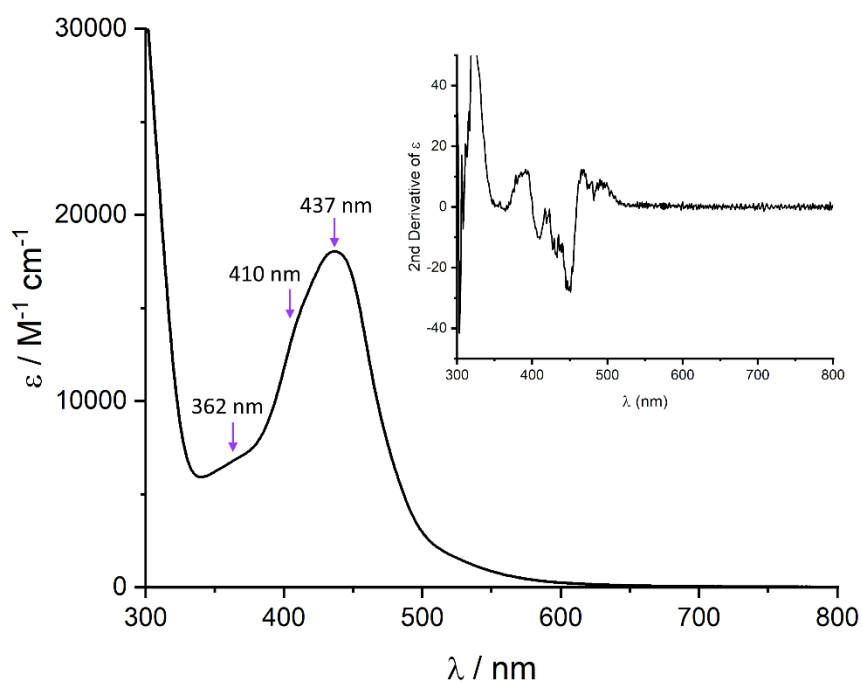

Figure S18: UV-Vis spectrum of  $[\text{Ru}^{\text{II}}(\text{L}^{\text{pyridazine}})_3](\text{PF}_6)_2$  (**2**) measured in acetonitrile. Inset: 2<sup>nd</sup> Derivative of the extinction coefficient.

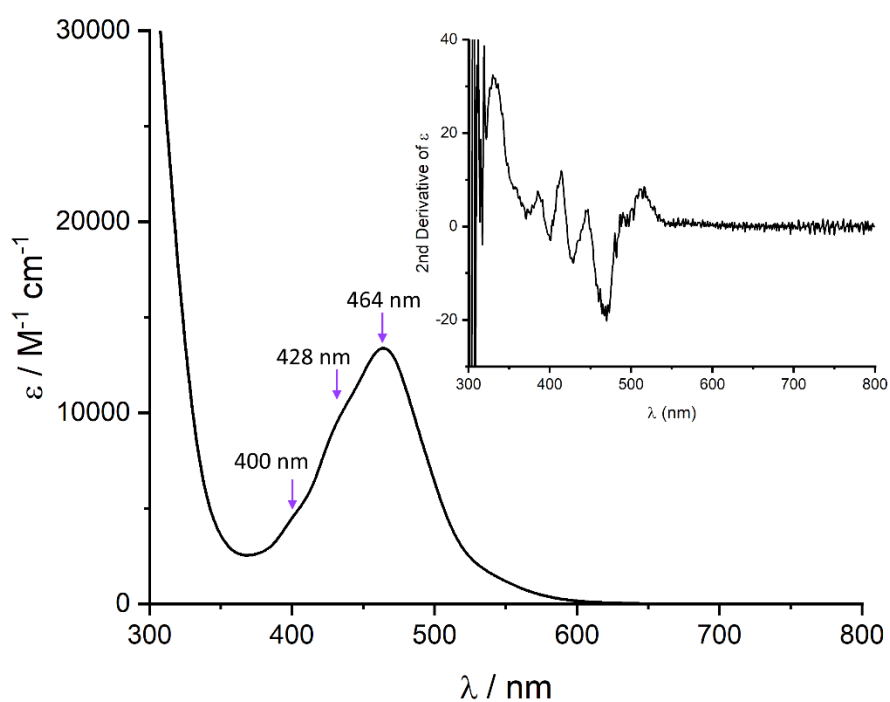

Figure S19: UV-Vis spectrum of  $[\text{Ru}^{\text{II}}(\text{L}^{\text{4-pyrimidine}})_3](\text{PF}_6)_2$  (**3**) measured in acetonitrile. Inset: 2<sup>nd</sup> Derivative of the extinction coefficient.

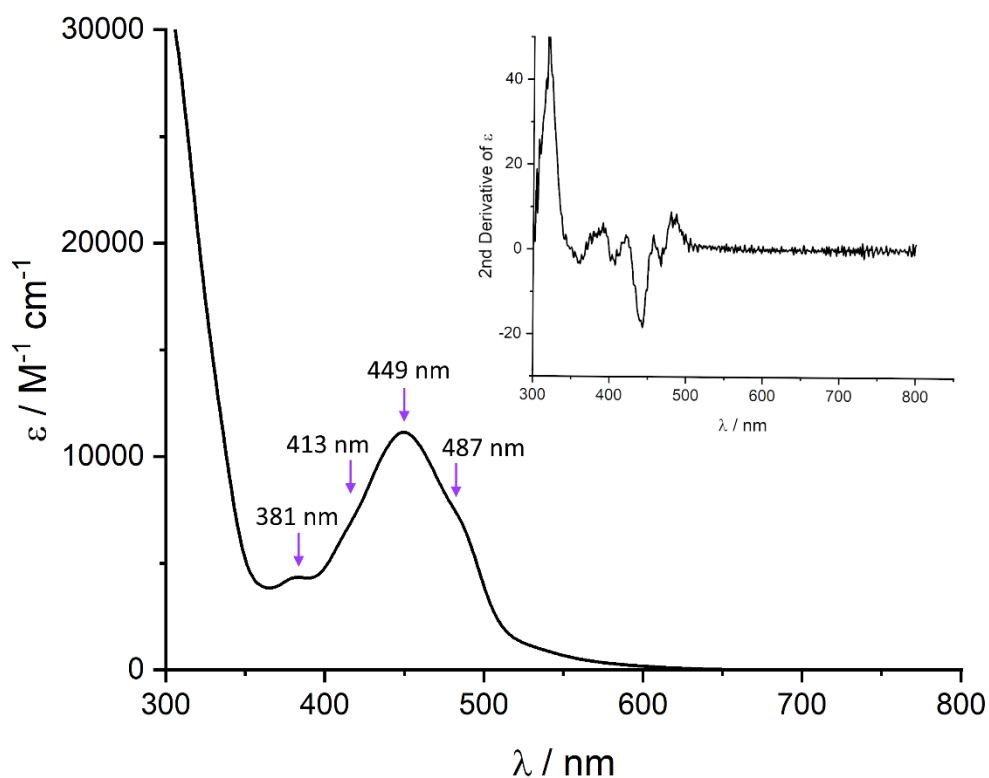

Figure S20: UV-Vis spectrum of  $[\text{Ru}^{\text{II}}(\text{L-pyrazine})_3](\text{PF}_6)_2$  (**4**) measured in acetonitrile. Inset: 2<sup>nd</sup> Derivative of the extinction coefficient.

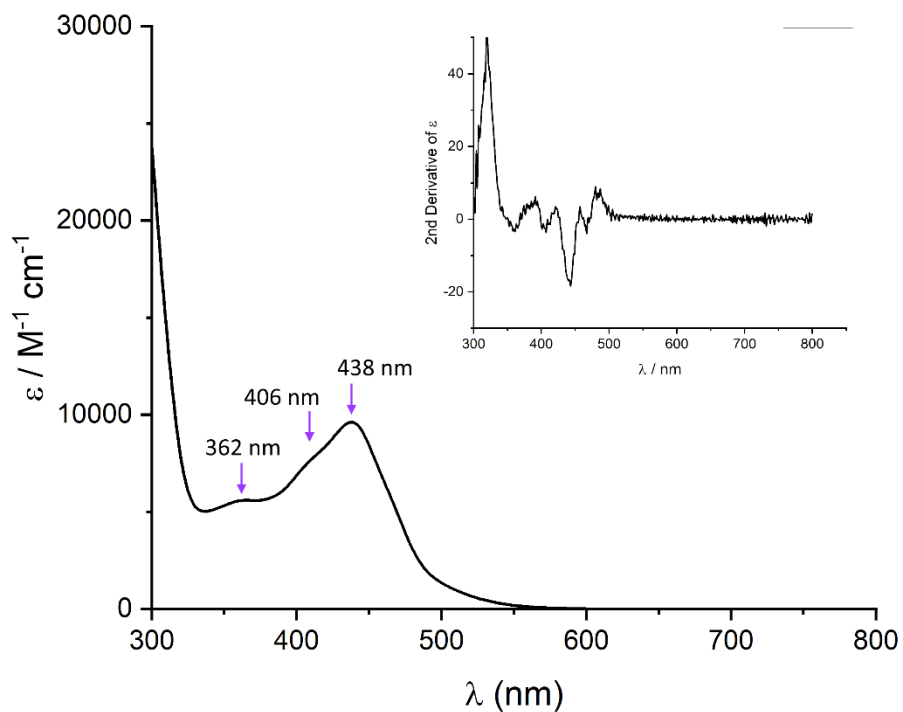

Figure S21: UV-Vis spectrum of  $[\text{Ru}^{\text{II}}(\text{L}^2\text{-pyrimidine})_3](\text{PF}_6)_2$  (**5**) measured in acetonitrile. Inset: 2<sup>nd</sup> Derivative of the extinction coefficient.

Table S4: Comparison of the UV-Vis spectra of the  $[\text{Ru}(\text{L}^{\text{azine}})_3]^{2+}$  complexes in acetonitrile with some literature  $[\text{Ru}(\text{biazine})_3]^{2+}$  complexes.<sup>4, 5</sup> <sup>a</sup>Note that the ligand used in the study by Kawanishi and co-workers was 6,6'-dimethyl-4,4'-bipyrimidine.

| Azine                    | Ours                  |                                               | Kaim – $[\text{Ru}(\text{biazine})_2]^{2+}$ |                                               | Kawanishi– $[\text{Ru}(\text{biazine})_2]^{2+}$ |                                               |
|--------------------------|-----------------------|-----------------------------------------------|---------------------------------------------|-----------------------------------------------|-------------------------------------------------|-----------------------------------------------|
|                          | $\lambda / \text{nm}$ | $\epsilon / \text{L mol}^{-1} \text{cm}^{-1}$ | $\lambda / \text{nm}$                       | $\epsilon / \text{L mol}^{-1} \text{cm}^{-1}$ | $\lambda / \text{nm}$                           | $\epsilon / \text{L mol}^{-1} \text{cm}^{-1}$ |
| pyridazine               | 362                   |                                               |                                             |                                               | 360                                             | 11748                                         |
|                          | 410                   |                                               | 410                                         | 12022                                         | 412                                             | 12022                                         |
|                          | 437                   | 18053                                         | 444                                         | 11481                                         | 447                                             | 12022                                         |
| pyridine                 | 381                   |                                               |                                             |                                               |                                                 |                                               |
|                          | 407                   |                                               |                                             |                                               |                                                 |                                               |
|                          | 438                   | 16163                                         | 451                                         | 14125                                         | 449                                             | 14791                                         |
| 2pyrimidine              | 362                   |                                               |                                             |                                               |                                                 |                                               |
|                          | 406                   |                                               | 418                                         | 8128                                          | 331                                             | 16982                                         |
|                          | 438                   | 9620                                          | 454                                         | 8511                                          | 450                                             | 8709                                          |
| pyrazine                 | 381                   |                                               |                                             |                                               |                                                 |                                               |
|                          | 413                   |                                               | 415                                         |                                               |                                                 |                                               |
|                          | 449                   | 11144                                         | 440                                         | 12882                                         | 439                                             | 13803                                         |
|                          | 487                   |                                               |                                             |                                               |                                                 |                                               |
| 4pyrimidine <sup>a</sup> | 428                   |                                               | 462                                         |                                               |                                                 |                                               |
|                          | 464                   | 13385                                         | 496                                         | 6456                                          | 497                                             | 10000                                         |

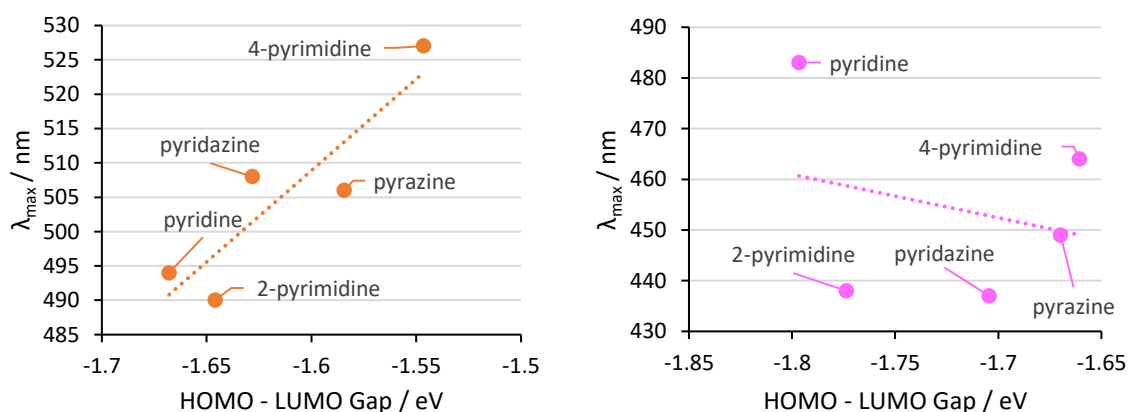

Figure S22: No correlations were found between the  $\lambda_{\text{max}}$  value observed experimentally for each of the complexes and the respective calculated HOMO-LUMO energy gap, for either  $[\text{Fe}(\text{L}^{\text{azine}})_3]^{2+}$  (left, orange) or  $[\text{Ru}(\text{L}^{\text{azine}})_3]^{2+}$  (right, pink).

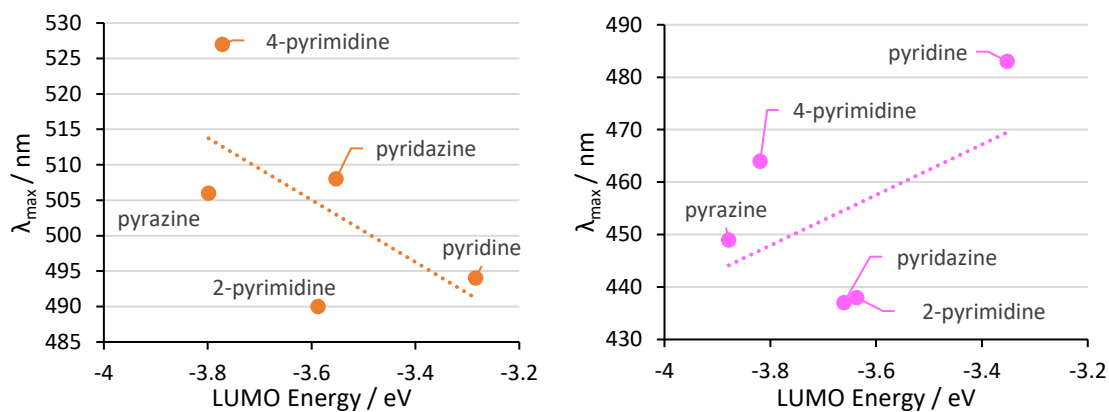

Figure S23: No correlations were found between the  $\lambda_{\max}$  value observed experimentally for each of the complexes and the respective calculated LUMO energy, for either  $[\text{Fe}(\text{L}^{\text{azine}})_3]^{2+}$  (left, orange) or  $[\text{Ru}(\text{L}^{\text{azine}})_3]^{2+}$  (right, pink).

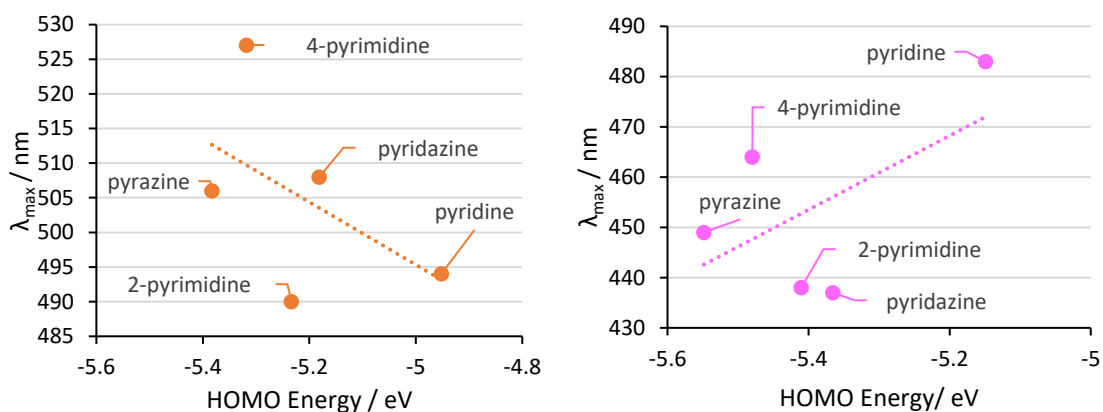

Figure S24: No correlations were found between the  $\lambda_{\max}$  value observed experimentally for each of the complexes and the respective calculated HOMO energy, for either  $[\text{Fe}(\text{L}^{\text{azine}})_3]^{2+}$  (left, orange) or  $[\text{Ru}(\text{L}^{\text{azine}})_3]^{2+}$  (right, pink).

## Density Functional Theory Calculations – Orca 4.0.1

Initial DFT testing of the ruthenium complexes was done using Orca 4.0.1 to look at the difference in energies of the isomers (*mer* and *fac*) on the Ru(II) complexes. Calculations of the HOMO energies of all the isomers of the ruthenium complexes were also carried out.

All calculations were performed within DFT theory with the BP86 functional set.<sup>7, 8</sup> In all cases dispersion corrections were added using D3 version of Grimmes dispersion with Becke-Johnson damping.<sup>9</sup> For Ru and the corresponding def2-ECP was used.<sup>10</sup> Where applicable the complexes were optimised from the crystal structure data obtained. For the complexes where no crystal structure was available the geometry was optimised from the L<sup>pyridine</sup> complex with the appropriate CH replaced with N. Geometries were optimised first with the def2-SVP basis set with all atoms in the phase.<sup>11</sup> The minima were confirmed through the absence of imaginary frequencies. A second geometry optimisation was performed with the def2-TZVPP basis set.<sup>11</sup> Using the CPCM model with MeCN a final single point calculation was carried out.<sup>12</sup> The data from these calculations is listed below.

Tabulated electronic energy and molecular orbital energy values for  $[\text{Ru}^{\text{II}}(\text{L}^{\text{azine}})_3](\text{PF}_6)_2$

Table S5: Summary of computed electronic energy values ( $E_{\text{el}}$ ) of the *mer* and *fac* isomers of the ruthenium(II) complexes.

|                                                                            | $E_{\text{el}}$ (Hartree) |                |               |                |
|----------------------------------------------------------------------------|---------------------------|----------------|---------------|----------------|
|                                                                            | Fac- $\Delta$             | Fac- $\Lambda$ | Mer- $\Delta$ | Mer- $\Lambda$ |
| $[\text{Ru}^{\text{II}}(\text{L}^{\text{pyridine}})_3](\text{PF}_6)_2$     | -3068.2526                | -3068.2582     | -3068.2589    | -3068.2579     |
| $[\text{Ru}^{\text{II}}(\text{L}^{\text{pyridazine}})_3](\text{PF}_6)_2$   | -3116.3105                | -3116.3106     | -3116.3093    | -3116.3087     |
| $[\text{Ru}^{\text{II}}(\text{L}^{\text{2-pyrimidine}})_3](\text{PF}_6)_2$ | -3116.3829                | -3116.3831     | -3116.3862    | -3116.3852     |
| $[\text{Ru}^{\text{II}}(\text{L}^{\text{4-pyrimidine}})_3](\text{PF}_6)_2$ | -3116.3874                | -3116.3877     | -3116.3878    | -3116.3872     |
| $[\text{Ru}^{\text{II}}(\text{L}^{\text{pyrazine}})_3](\text{PF}_6)_2$     | -3116.3688                | -3116.3692     | -3116.3673    | -3116.3690     |

Table S6: Selected MO energies of the five  $[\text{Ru}^{\text{II}}(\text{L}^{\text{azine}})_3]^{2+}$  complexes, as calculated by DFT.

|                                                                            | Isomer     | HOMO / eV | LUMO / eV | HOMO-LUMO Gap / eV |
|----------------------------------------------------------------------------|------------|-----------|-----------|--------------------|
| $[\text{Ru}^{\text{II}}(\text{L}^{\text{4-pyrimidine}})_3](\text{PF}_6)_2$ | fac delta  | -5.527724 | -3.867556 | 1.660168           |
|                                                                            | fac lambda | -5.526907 | -3.867284 | 1.659623           |
|                                                                            | mer delta  | -5.530989 | -3.877625 | 1.653365           |
|                                                                            | mer lambda | -5.531533 | -3.879801 | 1.651732           |
| $[\text{Ru}^{\text{II}}(\text{L}^{\text{2-pyrimidine}})_3](\text{PF}_6)_2$ | fac delta  | -5.436566 | -3.654491 | 1.782075           |
|                                                                            | fac lambda | -5.421871 | -3.645239 | 1.776632           |
|                                                                            | mer delta  | -5.441736 | -3.658845 | 1.782891           |
|                                                                            | mer lambda | -5.447450 | -3.665920 | 1.781530           |
| $[\text{Ru}^{\text{II}}(\text{L}^{\text{pyridine}})_3](\text{PF}_6)_2$     | fac delta  | -5.161730 | -3.385642 | 1.776088           |
|                                                                            | fac lambda | -5.168805 | -3.370404 | 1.798401           |
|                                                                            | mer delta  | -5.176425 | -3.379928 | 1.796497           |
|                                                                            | mer lambda | -5.176969 | -3.494488 | 1.682481           |
| $[\text{Ru}^{\text{II}}(\text{L}^{\text{pyrazine}})_3](\text{PF}_6)_2$     | fac delta  | -5.640379 | -3.903747 | 1.736632           |
|                                                                            | fac lambda | -5.636842 | -3.900210 | 1.736632           |
|                                                                            | mer delta  | -5.603916 | -3.938850 | 1.665066           |
|                                                                            | mer lambda | -5.597657 | -3.930143 | 1.667515           |
| $[\text{Ru}^{\text{II}}(\text{L}^{\text{pyridazine}})_3](\text{PF}_6)_2$   | fac delta  | -5.425681 | -3.621021 | 1.804660           |
|                                                                            | fac lambda | -5.426497 | -3.621565 | 1.804932           |
|                                                                            | mer delta  | -5.362300 | -3.660600 | 1.701700           |
|                                                                            | mer lambda | -5.354115 | -3.657756 | 1.696359           |

## Plots of HOMO Energies versus $E_m$ at Varying Scan Rates

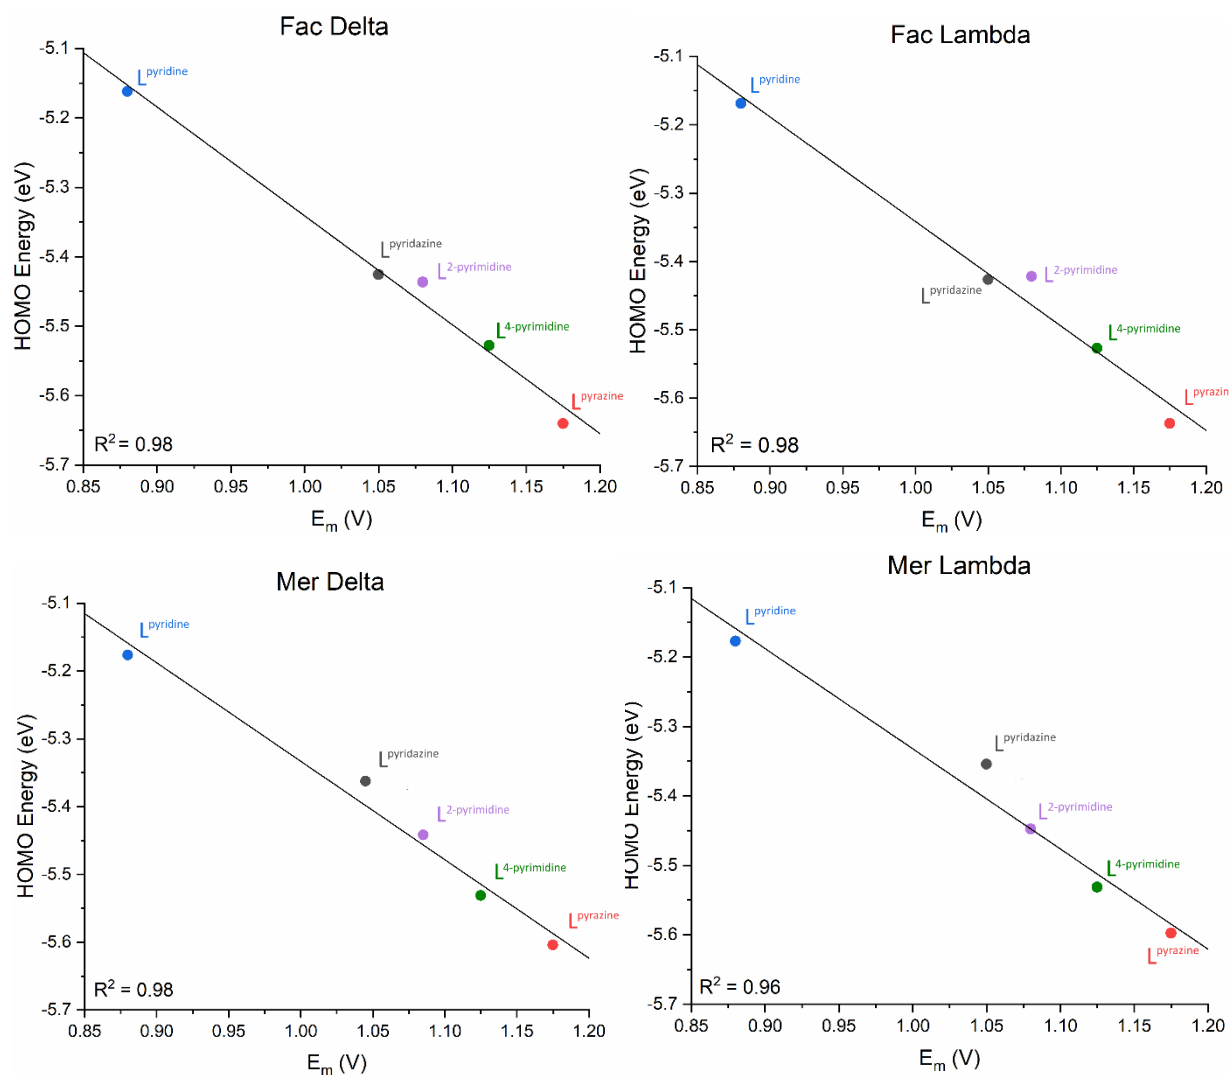

Figure S25: Plots showing the linear fit of experimental  $E_m(\text{Ru}^{\text{III/II}})$  values for the  $[\text{Ru}(\text{Lazine})_3](\text{PF}_6)_2$  of the complexes as measured by CV (100 mV/s) in dry MeCN containing 0.1 M TBAPF<sub>6</sub> against 0.01 M AgNO<sub>3</sub>/Ag reference electrode versus DFT calculated energies of the HOMOs.



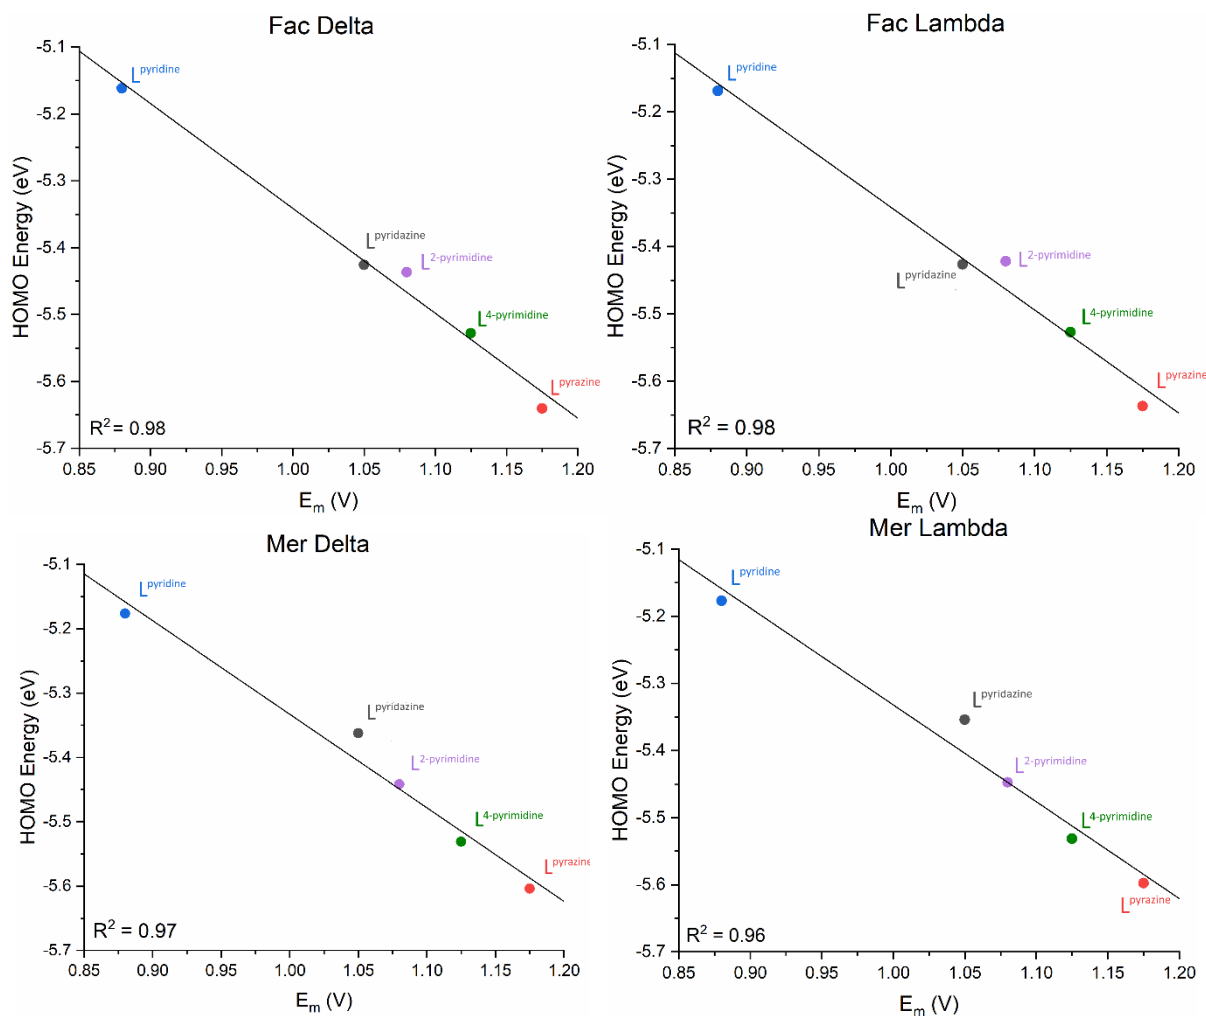

Figure 26: Plots showing the linear fit of experimental  $E_m(\text{Ru}^{\text{III/II}})$  values for the  $[\text{Ru}(\text{L}^{\text{azine}})_3](\text{PF}_6)_2$  of the complexes as measured by CV (50 mV/s) in dry MeCN containing 0.1 M TBAPF<sub>6</sub> against 0.01 M AgNO<sub>3</sub>/Ag reference electrode versus DFT calculated energies of the HOMOs.

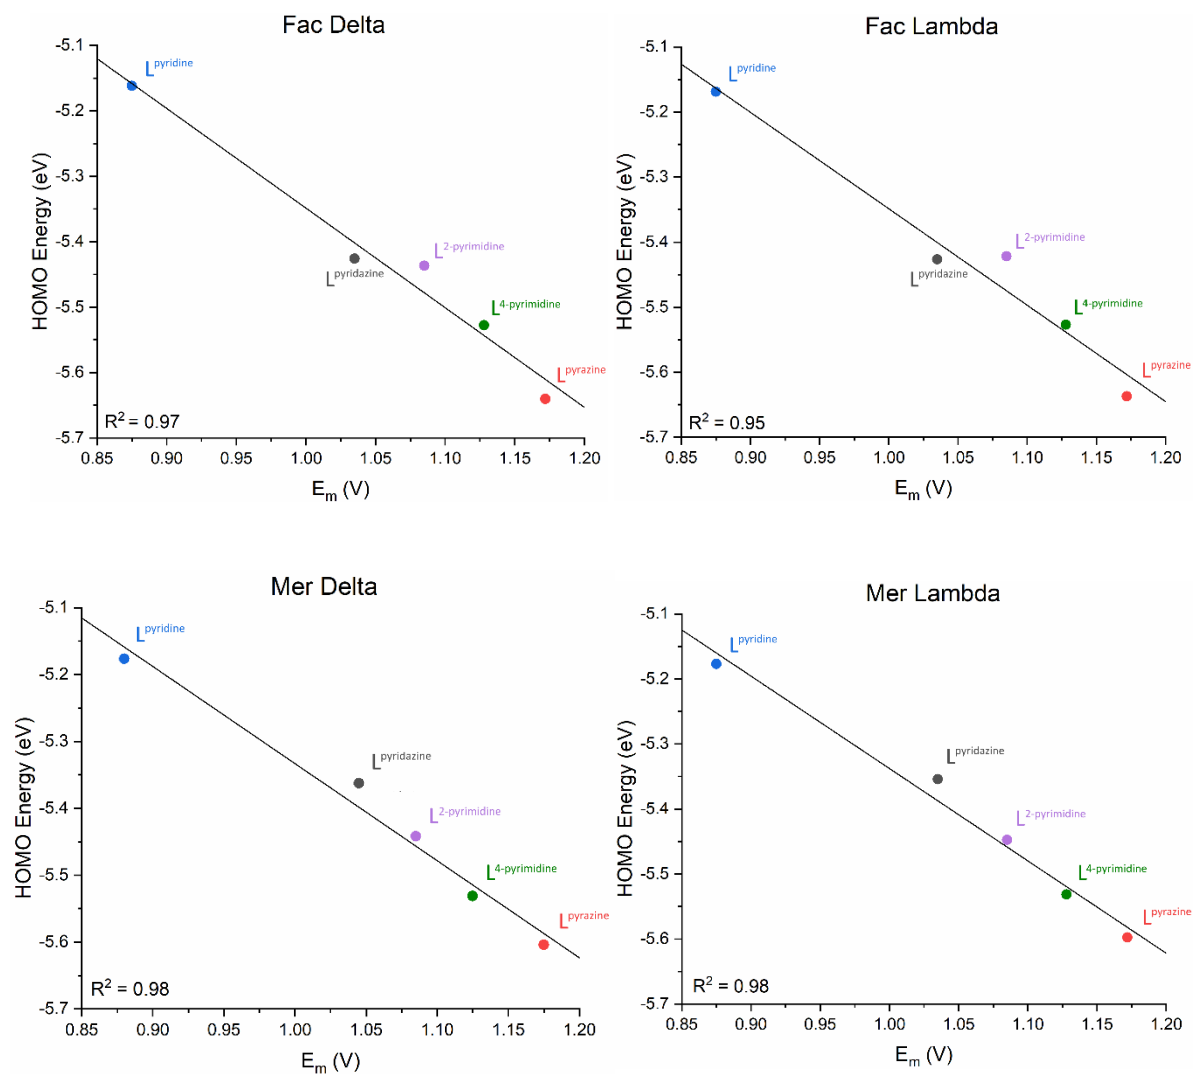

Figure S27: Plots showing the linear fit of experimental  $E_m(\text{Ru}^{\text{III/II}})$  values for the  $[\text{Ru}(\text{Lazine})_3](\text{PF}_6)_2$  of the complexes as measured by CV (200 mV/s) in dry MeCN containing 0.1 M TBAPF<sub>6</sub> against 0.01 M AgNO<sub>3</sub>/Ag reference electrode versus DFT calculated energies of the HOMOs.

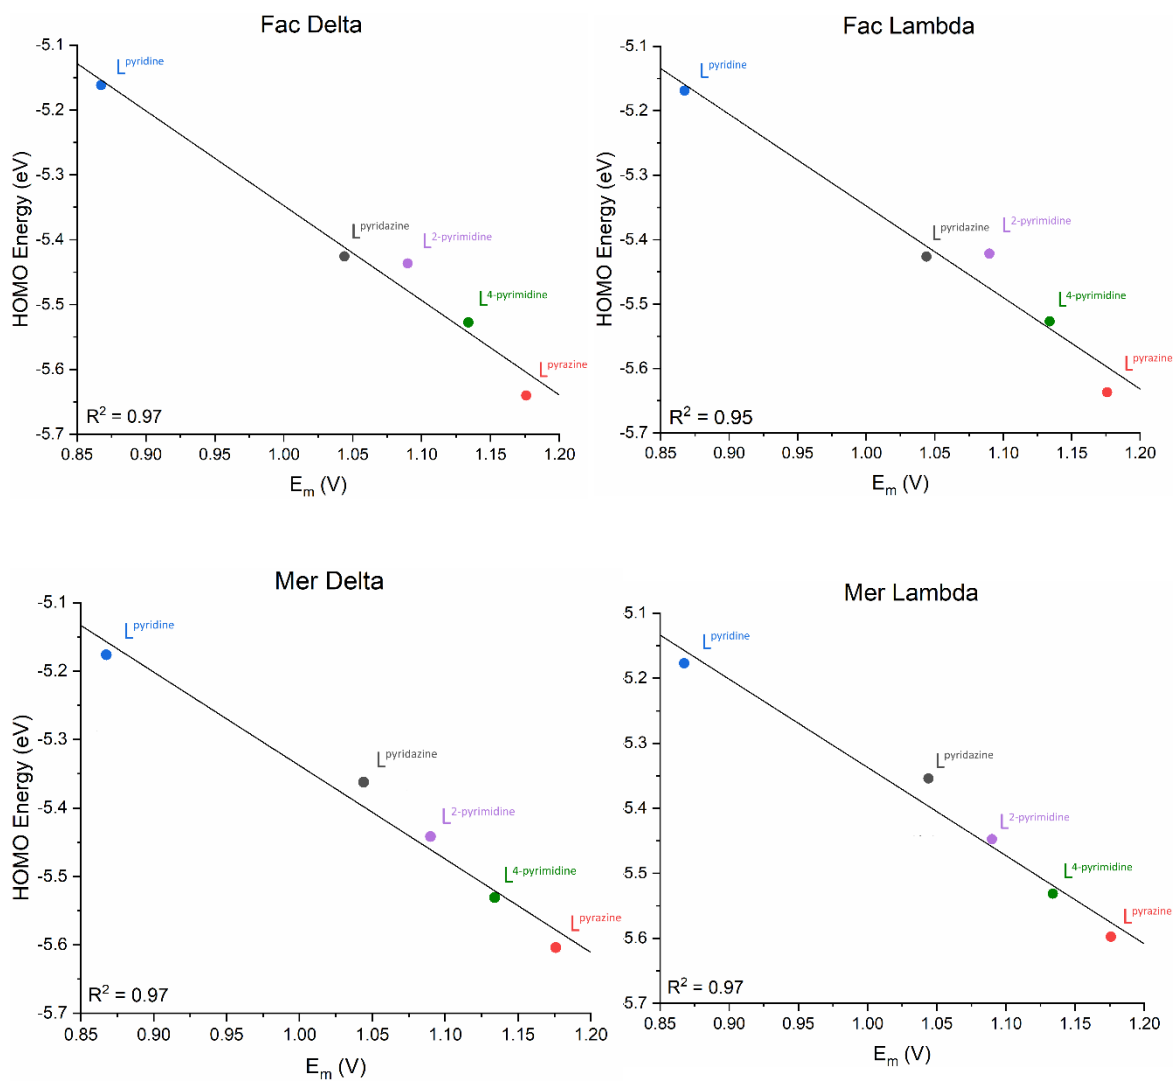

Figure S28: Plots showing the linear fit of experimental  $E_m(\text{Ru}^{\text{III/II}})$  values for the  $[\text{Ru}(\text{Lazine})_3](\text{PF}_6)_2$  of the complexes as measured by CV (400 mV/s) in dry MeCN containing 0.1 M TBAPF<sub>6</sub> against 0.01 M AgNO<sub>3</sub>/Ag reference electrode versus DFT calculated energies of the HOMOs.

## Density Functional Theory Calculations – Orca 5.0.3

All further calculations were done using Orca 5.0.3 on the iron, ruthenium and osmium mer- $\Delta$  complexes.<sup>13</sup> All calculations were performed within DFT theory with the BP86 functional set.<sup>7,8</sup> In all cases dispersion corrections were added using D3 version of Grimmes dispersion with Becke-Johnson damping.<sup>9</sup> For Ru and Os the corresponding def2-ECP was used.<sup>10</sup> Where applicable the complexes were optimised from the crystal structure data obtained. For the Fe and Ru complexes where no crystal structure was available the geometry was optimised from the  $L^{\text{pyridine}}$  complex with the appropriate CH replaced with N. The structures of the Os complexes were optimised starting from the Ru<sup>II</sup> geometries. Geometries were optimised first with the def2-SVP basis set with all atoms in the phase.<sup>11</sup> The minima were confirmed through the absence of imaginary frequencies. A second geometry optimisation was performed with the def2-TZVPP basis set.<sup>11</sup> Using the CPCM model with MeCN a final single point calculation was carried out.<sup>12</sup> The data from these calculations is listed below.

Table S7: Selected structural parameters of the calculated structures of the  $[M^{II}(L^{\text{azine}})_3]^{2+}$  families of compounds.

|                  |             | Average M-L bond length / Å |       |          | Octahedral distortion /° |        |          |
|------------------|-------------|-----------------------------|-------|----------|--------------------------|--------|----------|
|                  |             | R                           | NR    | $\Delta$ | R                        | NR     | $\Delta$ |
| Fe <sup>II</sup> | pyridine    | 1.941                       | -     | -        | 54.87                    | -      | -        |
|                  | pyridazine  | 1.927                       | -     | -        | 53.01                    | -      | -        |
|                  | 2pyrimidine | 1.940                       | -     | -        | 58.13                    | -      | -        |
|                  | 4pyrimidine | 1.941                       | -     | -        | 63.66                    | -      | -        |
|                  | pyrazine    | 1.939                       | -     | -        | 55.35                    | -      | -        |
| Ru <sup>II</sup> | pyridine    | 2.044                       | 2.061 | 0.017    | 73.93                    | 76.32  | 2.39     |
|                  | pyridazine  | 2.033                       | 2.050 | 0.017    | 71.95                    | 74.04  | 2.09     |
|                  | 2pyrimidine | 2.044                       | 2.061 | 0.017    | 73.21                    | 74.48  | 1.27     |
|                  | 4pyrimidine | 2.044                       | 2.061 | 0.018    | 74.85                    | 75.99  | 1.14     |
|                  | pyrazine    | 2.041                       | 2.058 | 0.017    | 73.26                    | 74.54  | 1.28     |
| Os <sup>II</sup> | pyridine    | 2.055                       | 2.105 | 0.050    | 78.49                    | 84.24  | 5.75     |
|                  | pyridazine  | 2.045                       | 2.100 | 0.055    | 78.27                    | 107.04 | 28.77    |
|                  | 2pyrimidine | 2.055                       | 2.106 | 0.051    | 78.42                    | 82.05  | 3.63     |
|                  | 4pyrimidine | 2.055                       | 2.105 | 0.050    | 80.04                    | 82.96  | 2.93     |
|                  | pyrazine    | 2.052                       | 2.102 | 0.050    | 78.39                    | 81.49  | 3.10     |

Table S8: Selected MO energies for the M<sup>2+</sup> complexes calculated with Orca5.0.3.

| Metal     | Ligand      | HOMO / eV | LUMO / eV | HOMO-LUMO Gap / eV |
|-----------|-------------|-----------|-----------|--------------------|
| <b>Fe</b> | pyridine    | -4.9522   | -3.2843   | -1.6679            |
|           | pyridazine  | -5.1813   | -3.553    | -1.6283            |
|           | 4pyrimidine | -5.3183   | -3.7718   | -1.5465            |
|           | pyrazine    | -5.383    | -3.7986   | -1.5844            |
|           | 2pyrimidine | -5.2337   | -3.5877   | -1.646             |
| <b>Ru</b> | pyridine    | -5.149    | -3.3523   | -1.7967            |
|           | pyridazine  | -5.3654   | -3.661    | -1.7044            |
|           | 4pyrimidine | -5.4797   | -3.8191   | -1.6606            |
|           | pyrazine    | -5.5484   | -3.8786   | -1.6698            |
|           | 2pyrimidine | -5.4104   | -3.6368   | -1.7736            |
| <b>Os</b> | pyridine    | -5.0197   | -3.4103   | -1.6094            |
|           | pyridazine  | -5.2379   | -3.7284   | -1.5095            |
|           | 4pyrimidine | -5.3433   | -3.8655   | -1.4778            |
|           | pyrazine    | -5.4314   | -3.9433   | -1.4881            |
|           | 2pyrimidine | -5.2904   | -3.6953   | -1.5951            |

Table S9: Selected MO energies for the adiabatic M<sup>3+</sup> complexes calculated with Orca5.0.3. Geometry optimised with M<sup>3+</sup>

| Metal     | Ligand      | SOMO / eV | LUMO / eV | HOMO-LUMO Gap / eV |
|-----------|-------------|-----------|-----------|--------------------|
| <b>Fe</b> | pyridine    | -6.4303   | -3.8946   | -2.5357            |
|           | pyridazine  | -6.5111   | -4.0979   | -2.4132            |
|           | 4pyrimidine | -6.5927   | -4.2579   | -2.3348            |
|           | pyrazine    | -6.5445   | -4.2977   | -2.2468            |
|           | 2pyrimidine | -6.4806   | -4.1177   | -2.3629            |
| <b>Ru</b> | pyridine    | -6.3363   | -3.8036   | -2.5327            |
|           | pyridazine  | -6.457    | -4.1036   | -2.3534            |
|           | 4pyrimidine | -6.5011   | -4.2732   | -2.2279            |
|           | pyrazine    | -6.4775   | -4.278    | -2.1995            |
|           | 2pyrimidine | -6.3979   | -4.0817   | -2.3162            |
| <b>Os</b> | pyridine    | -6.2373   | -3.8564   | -2.3809            |
|           | pyridazine  | -6.3912   | -4.1822   | -2.209             |
|           | 4pyrimidine | -6.4525   | -4.3235   | -2.129             |
|           | pyrazine    | -6.4076   | -4.352    | -2.0556            |
|           | 2pyrimidine | -6.354    | -4.1469   | -2.2071            |

Table S10: Selected MO energies for the vertical  $M^{3+}$  complexes calculated with Orca5.0.3. Structure optimised with  $M^{2+}$  geometry. Single point calculation carried out as  $M^{3+}$ .

| Metal | Ligand      | SOMO / eV | LUMO / eV | HOMO-LUMO Gap / eV |
|-------|-------------|-----------|-----------|--------------------|
| Fe    | pyridine    | -6.4601   | -3.9021   | -2.558             |
|       | pyridazine  | -6.542    | -4.1097   | -2.4323            |
|       | 4pyrimidine | -6.5977   | -4.3414   | -2.2563            |
|       | pyrazine    | -6.5673   | -4.3169   | -2.2504            |
|       | 2pyrimidine | -6.5281   | -4.1633   | -2.3648            |
| Ru    | pyridine    | -6.3514   | -3.833    | -2.5184            |
|       | pyridazine  | -6.4944   | -4.1507   | -2.3437            |
|       | 4pyrimidine | -6.5049   | -4.3027   | -2.2022            |
|       | pyrazine    | -6.4723   | -4.3271   | -2.1452            |
|       | 2pyrimidine | -6.4606   | -4.1068   | -2.3538            |
| Os    | pyridine    | -6.2604   | -3.9017   | -2.3587            |
|       | pyridazine  | -6.4585   | -4.2319   | -2.2266            |
|       | 4pyrimidine | -6.4605   | -4.3615   | -2.099             |
|       | pyrazine    | -6.4437   | -4.4103   | -2.0334            |
|       | 2pyrimidine | -6.4016   | -4.1847   | -2.2169            |

Table S11: Selected MO energies for the non-relativistic  $M^{2+}$  complexes calculated with Orca5.0.3.

| Metal | Ligand      | HOMO / eV | LUMO / eV | HOMO-LUMO Gap / eV | Difference in non-relativistic and relativistic HOMO (HOMO <sub>nonrel</sub> - HOMO <sub>rel</sub> ) |
|-------|-------------|-----------|-----------|--------------------|------------------------------------------------------------------------------------------------------|
| Ru    | pyridine    | -5.2028   | -3.3364   | -1.8664            | -0.0538                                                                                              |
|       | pyridazine  | -5.4125   | -3.644    | -1.7685            | -0.0471                                                                                              |
|       | 4pyrimidine | -5.5169   | -3.8076   | -1.7093            | -0.0372                                                                                              |
|       | pyrazine    | -5.5936   | -3.8578   | -1.7358            | -0.0452                                                                                              |
|       | 2pyrimidine | -5.4607   | -3.6195   | -1.8412            | -0.0503                                                                                              |
| Os    | pyridine    | -5.221    | -3.3548   | -1.8662            | -0.2013                                                                                              |
|       | pyridazine  | -5.4521   | -3.6974   | -1.7547            | -0.2142                                                                                              |
|       | 4pyrimidine | -5.5227   | -3.8197   | -1.703             | -0.1794                                                                                              |
|       | pyrazine    | -5.6016   | -3.8761   | -1.7255            | -0.1702                                                                                              |
|       | 2pyrimidine | -5.4682   | -3.631    | -1.8372            | -0.1778                                                                                              |

Perspective view of the HOMO of the mer complexes calculated with Orca 5.0.3

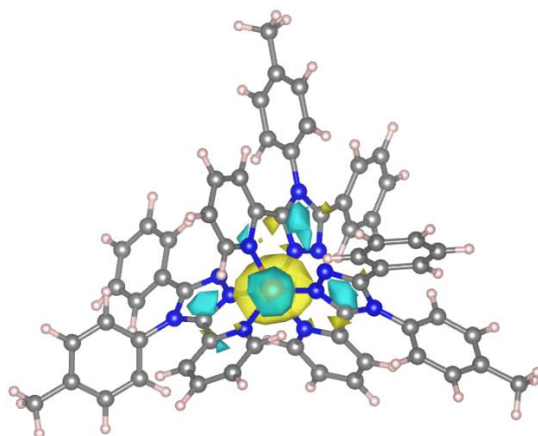

Figure S29: Perspective view of the HOMO of  $[\text{Fe}^{\text{II}}(\text{Lpyridine})_3]^{2+}$ .

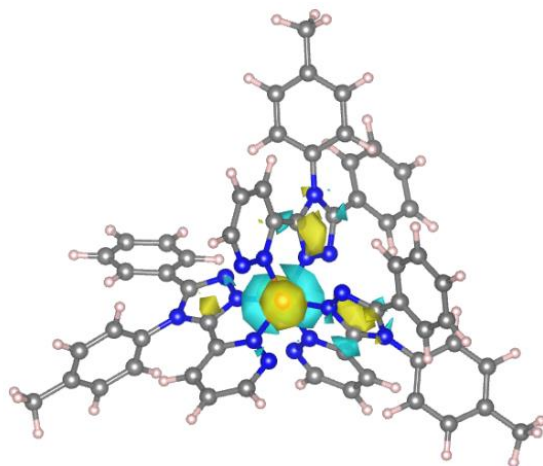

Figure S30: Perspective view of the HOMO of  $[\text{Fe}^{\text{II}}(\text{Lpyridazine})_3]^{2+}$ .

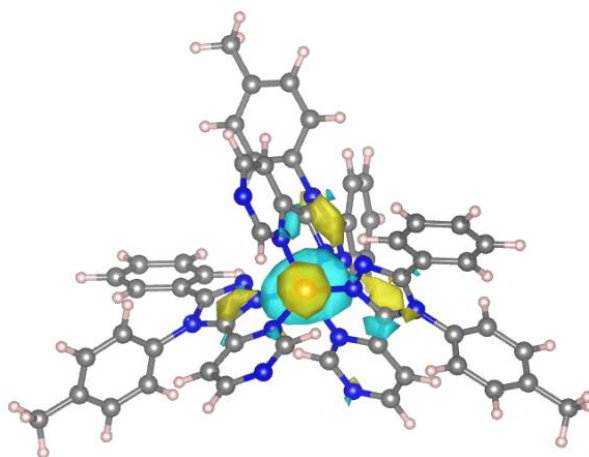

Figure S31: Perspective view of the HOMO of  $[\text{Fe}^{\text{II}}(\text{L}^4\text{-pyrimidine})_3]^{2+}$ .

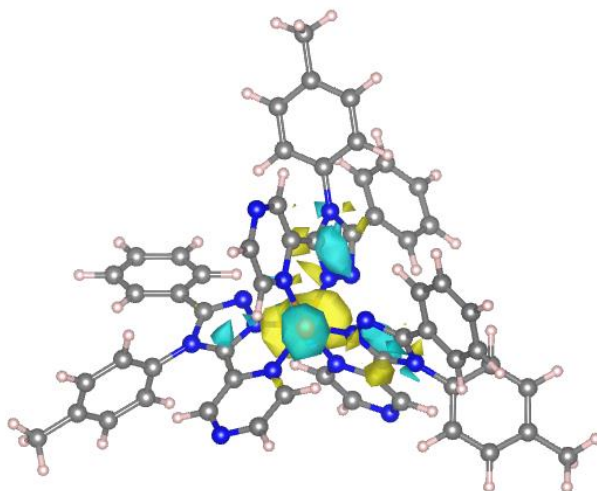

Figure S32: Perspective view of the HOMO of [Fe<sup>II</sup>(L-pyrazine)<sub>3</sub>]<sup>2+</sup>.

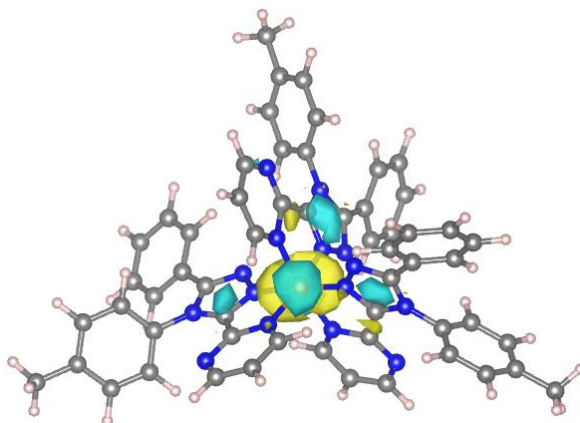

Figure S33: Perspective view of the HOMO of [Fe<sup>II</sup>(L<sup>2</sup>-pyrimidine)<sub>3</sub>]<sup>2+</sup>.

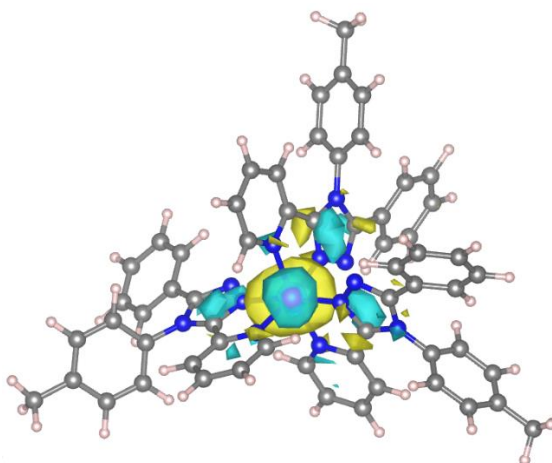

Figure S34: Perspective view of the HOMO of [Ru<sup>II</sup>(L-pyridine)<sub>3</sub>]<sup>2+</sup>.



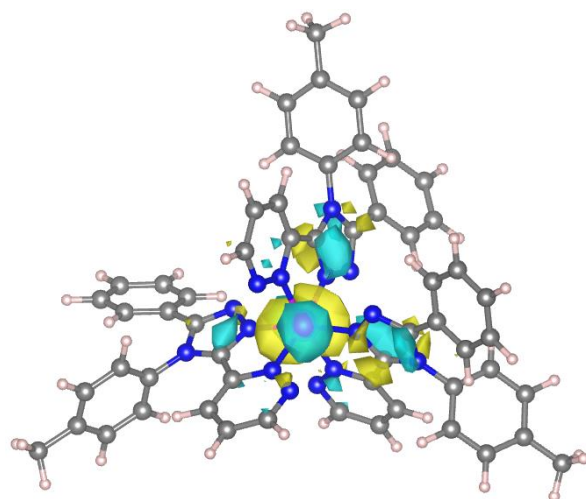

Figure S35: Perspective view of the HOMO of  $[\text{Ru}^{\text{II}}(\text{Lpyridazine})_3]^{2+}$ .

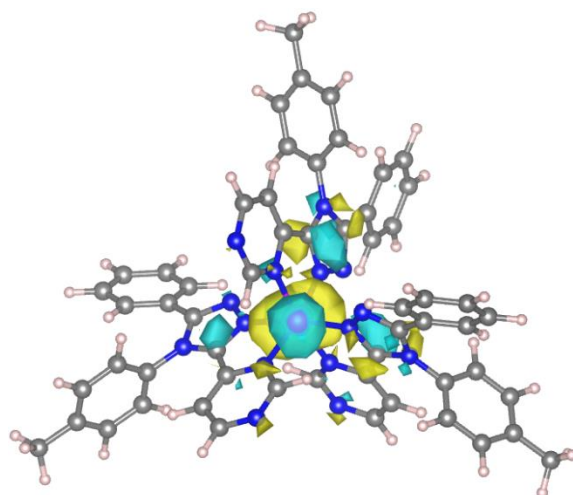

Figure S36: Perspective view of the HOMO of  $[\text{Ru}^{\text{II}}(\text{L}^4\text{-pyrimidine})_3]^{2+}$ .

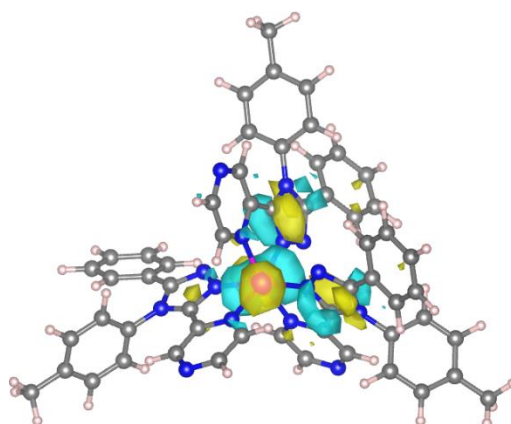

Figure S37: Perspective view of the HOMO of  $[\text{Ru}^{\text{II}}(\text{Lpyrazine})_3]^{2+}$ .

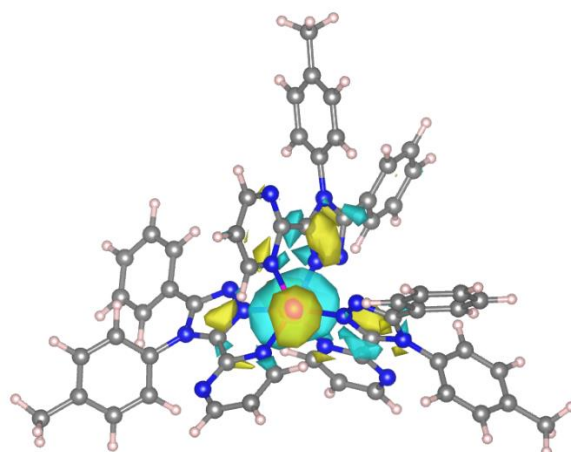

Figure S38: Perspective view of the HOMO of  $[\text{Ru}^{\text{II}}(\text{L}^2\text{-pyrimidine})_3]^{2+}$ .

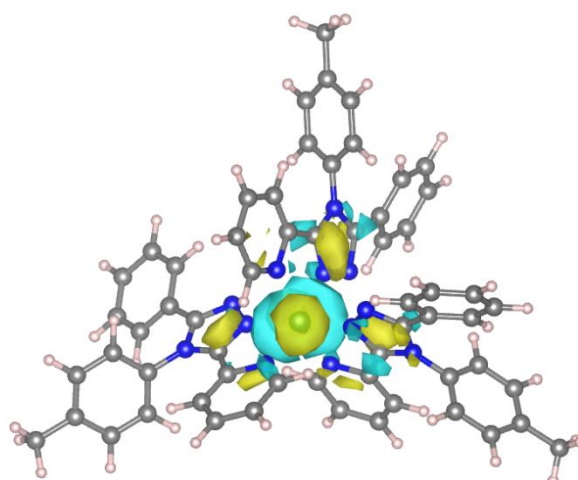

Figure S39: Perspective view of the HOMO of  $[\text{Os}^{\text{II}}(\text{Lpyridine})_3]^{2+}$ .

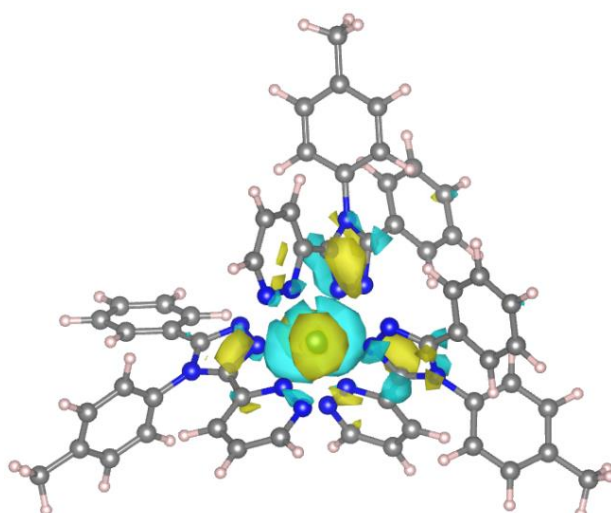

Figure S40: Perspective view of the HOMO of  $[\text{Os}^{\text{II}}(\text{Lpyridazine})_3]^{2+}$ .

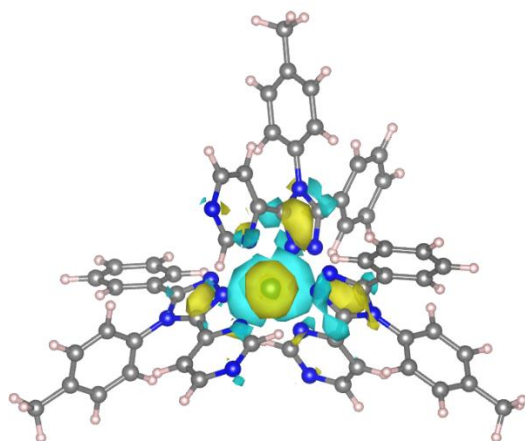

Figure S41: Perspective view of the HOMO of  $[\text{Os}^{\text{II}}(\text{L}^4\text{-pyrimidine})_3]^{2+}$ .

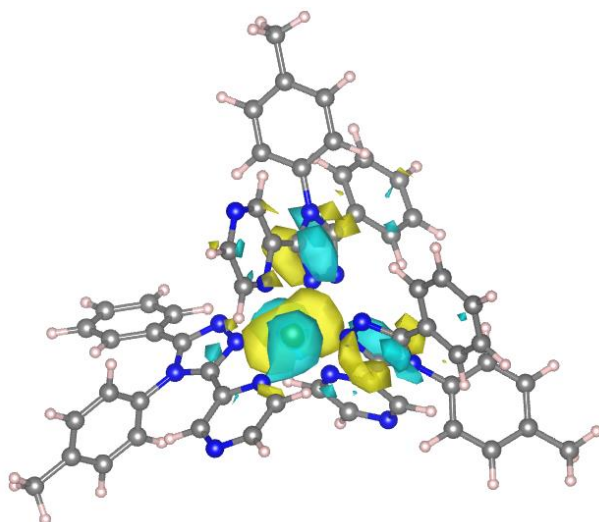

Figure S42: Perspective view of the HOMO of  $[\text{Os}^{\text{II}}(\text{Lpyrazine})_3]^{2+}$ .

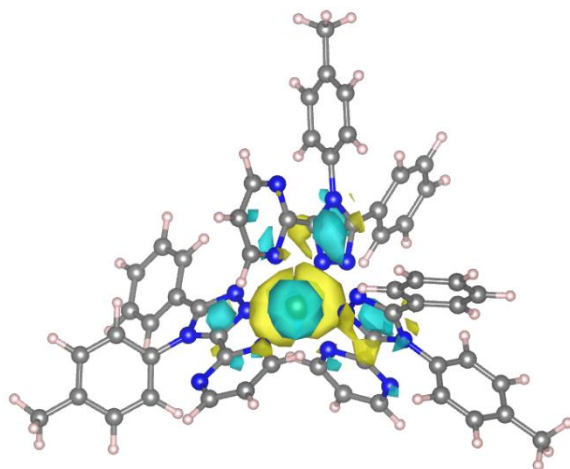

Figure S43: Perspective view of the HOMO of  $[\text{Os}^{\text{II}}(\text{L}^2\text{-pyrimidine})_3]^{2+}$ .

## Ionisation Potentials

Table S12: Tabulated values of final single point energy and calculated ionisation potentials. All values are calculated relativistically. All values given are in a.u unless specified otherwise

|    |                                    | Pyridine       | Pyridazine     | 2-Pyrimidine   | 4-Pyrimidine   | Pyrazine       |
|----|------------------------------------|----------------|----------------|----------------|----------------|----------------|
| Fe | Fe(II)                             | -3064.514286   | -3112.572957   | -3112.649016   | -3112.651842   | -3112.634407   |
|    | Fe(III)                            | -3064.31744602 | -3112.36796609 | -3112.44292503 | -3112.44322959 | -3112.42485560 |
|    | Fe(III) static                     | -3064.31428392 | -3112.36619299 | -3112.43985752 | -3112.44046122 | -3112.42138793 |
|    | Adiabatic                          | 0.19683969     | 0.20499132     | 0.20609057     | 0.20861269     | 0.20955130     |
|    | Vertical                           | 0.20000179     | 0.20676442     | 0.20915808     | 0.21138106     | 0.21301896     |
|    | Adiabatic/ kcal mol <sup>-1</sup>  | 123.5          | 129.7          | 131.2          | 132.6          | 133.7          |
|    | Vertical / kcal mol <sup>-1</sup>  | 125.5          | 129.7          | 131.2          | 132.6          | 133.7          |
| Ru | Ru(II)                             | -3068.70637442 | -3116.76295389 | -3116.84109348 | -3116.84344100 | -3116.82497359 |
|    | Ru(III)                            | Is             | -3116.55267553 | -3116.62958281 | -3116.62960812 | -3116.61014611 |
|    | Ru(III) static                     | -3068.50059703 | -3116.55075778 | -3116.62696499 | -3116.62676550 | -3116.60746333 |
|    | Adiabatic                          | #VALUE!        | 0.21027836     | 0.21151067     | 0.21383288     | 0.21482749     |
|    | Vertical                           | 0.20577739     | 0.21219611     | 0.21412849     | 0.21667550     | 0.21751027     |
|    | Adiabatic/ kcal mol <sup>-1</sup>  | #VALUE!        | 132.0          | 132.7          | 134.2          | 134.8          |
|    | Vertical/ kcal mol <sup>-1</sup>   | 129.1          | 133.2          | 134.4          | 136.0          | 136.5          |
| Os | Os(II)                             | -3064.514286   | -3112.572957   | -3112.649016   | -3112.651842   | -3112.634407   |
|    | Os(III)                            | -3064.31744602 | -3112.36796609 | -3112.44292503 | -3112.44322959 | -3112.42485560 |
|    | Os(III) static                     | -3064.31428392 | -3112.36619299 | -3112.43985752 | -3112.44046122 | -3112.42138793 |
|    | Adiabatic                          | 0.19683969     | 0.20499132     | 0.20609057     | 0.20861269     | 0.20955130     |
|    | Vertical                           | 0.20000179     | 0.20676442     | 0.20915808     | 0.21138106     | 0.21301896     |
|    | Adiabatic / kcal mol <sup>-1</sup> | 123.5          | 128.6          | 129.3          | 130.9          | 131.5          |
|    | Vertical/ kcal mol <sup>-1</sup>   | 125.5          | 129.7          | 131.2          | 132.6          | 133.7          |

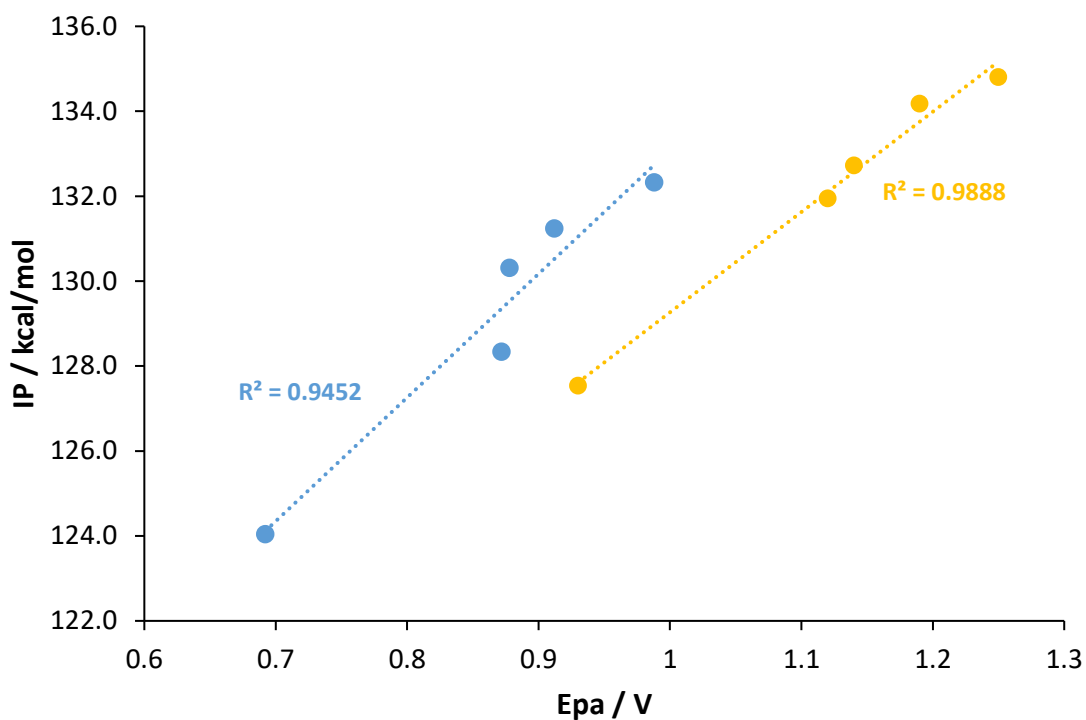

Figure S44: Plot of IP vs  $E_{pa}(\text{Ru}^{\text{III/II}})$  ( $100 \text{ mV s}^{-1}$ ) for the  $[\text{Fe}(\text{L}^{\text{azine}})_3]^{2+}$  series of compounds. Blue is the vertical IP, yellow the adiabatic IP.

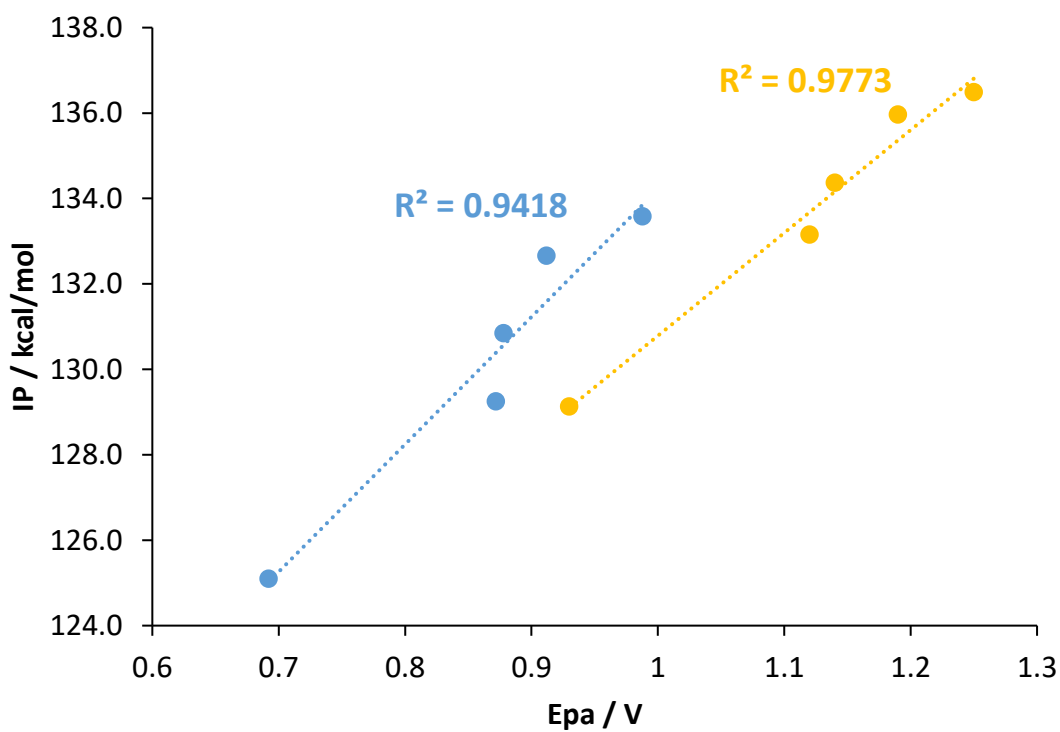

Figure S45: Plot of IP vs  $E_{pa}(\text{Ru}^{\text{III/II}})$  ( $100 \text{ mV s}^{-1}$ ) for the  $[\text{Ru}(\text{L}^{\text{azine}})_3]^{2+}$  series of compounds. Blue is the vertical IP, yellow the adiabatic IP.

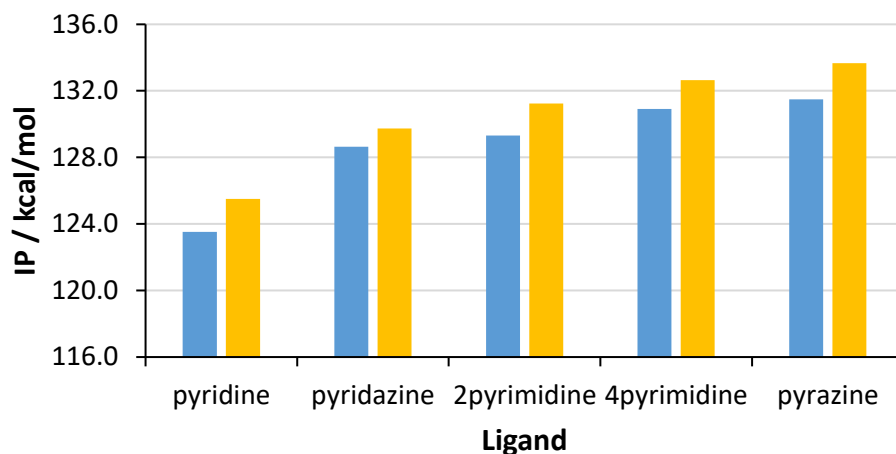

Figure S46: Plot of calculated IP's for the  $[\text{Os}(\text{L}^{\text{azine}})_3]^{2+}$  series of compounds. Blue is the vertical IP, orange the adiabatic IP.

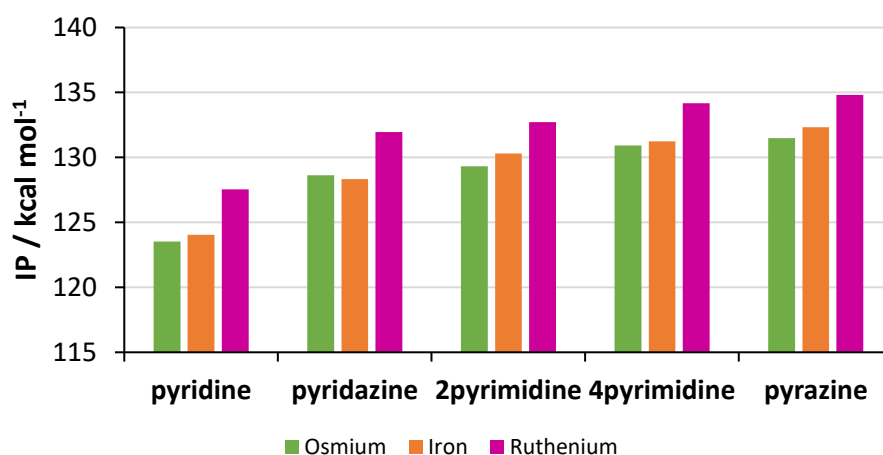

Figure S47: Plot of adiabatic ionisation potentials ( $\text{kcal mol}^{-1}$ ) for the 3 families of  $[\text{M}(\text{L}^{\text{azine}})_3]^{2+}$  compounds, M = Fe (orange), Ru (pink) and Os (green).

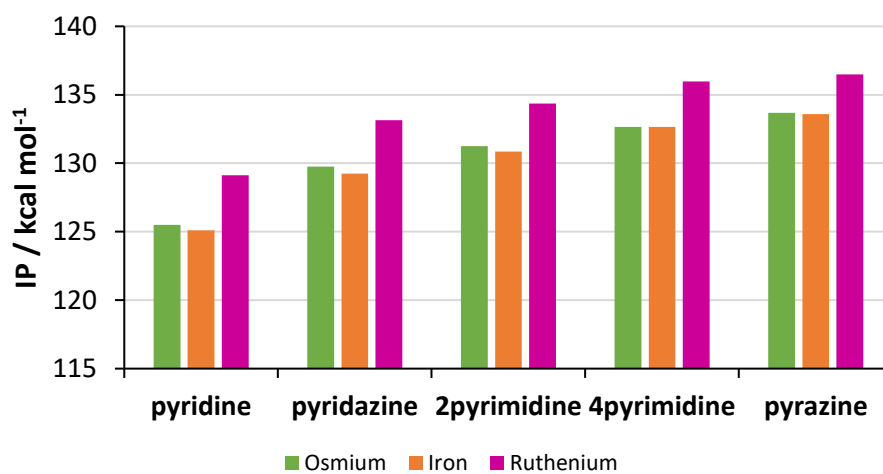

Figure S48: Plot of vertical ionisation potential ( $\text{kcal mol}^{-1}$ ) for the 3 families of  $[\text{M}(\text{L}^{\text{azine}})_3]^{2+}$  compounds, M = Fe (orange), Ru (pink) and Os (green).

Table S13: Results of calculations on the literature family of tris-ligated 2,2'-bipyridine complexes ( $[M(2,2'$ -bipyridine) $_3]^{2+}$ , M = Fe<sup>II</sup>, Ru<sup>II</sup>, Os<sup>II</sup>) carried out with the computational protocol described above.

|                      | Fe        | Ru        | Os        |
|----------------------|-----------|-----------|-----------|
| <b>HOMO</b>          | -5.013000 | -5.207800 | -5.092200 |
| <b>LUMO</b>          | -3.427700 | -3.472200 | -3.522100 |
| <b>HOMO-LUMO gap</b> | 1.585300  | 1.735600  | 1.570100  |
| <b>Abs. energy</b>   | -1726105  | -992618   | -989988   |

## DFT Calculations on the Ligands

### Initial Calculations on the Heterocycles

Custodio and co-workers have recently shown the direct method of calculating pKa is as efficient as the more commonly used thermodynamic cycle method.<sup>14</sup>

$$pK_a = \frac{1}{RT \ln 10} \times (G_{aq}(H^+) - G_{aq}(HA) + G_{aq}(A^-))$$

Here,  $G_{aq}(HA)$  and  $G_{aq}(A^-)$  are calculated using standard DFT methods, however the calculation of  $G_{aq}(H^+)$  is less straightforward. If a number of experimentally-determined pKa values are known for related species then rearrangement of equation 1 thus allows for the calculation of  $G_{aq}(H^+)$  as shown in equation 2.

$$G_{aq}(H^+) = (pK_a(\text{exp}) \times RT \ln 10) + G_{aq}(HA) - G_{aq}(A^-)$$

It has been shown that the calculations have an uncertainty on  $G_{aq}(H^+)$  calculated in this is  $\pm 1$  unit of pKa.

In this work, the value of  $G_{aq}(H^+)$  was derived using the unsubstituted parent azine heterocycles (ie. pyridine, pyrimidine, pyridazine and pyrazine) for which the experimental pKa values are known (pyrazine 0.65 < pyrimidine 1.30, pyridazine 2.30 < pyridine 5.20),<sup>15</sup> as the ligands in this study are based on them.

A number of basis sets under different conditions were tested: in the gas phase, with the inclusion of an implicit solvent model (CPCM). We found that the models with the inclusion of CPCM(water) gave more accurate results than those in vacuo (Figure S49 - Figure S52, Table S14). Of the basis sets tested, B3LYP with the inclusion of CPCM(water) was found to have the lowest standard error (Figure S41) giving  $G_{aq}(H^+) = -269.820 \text{ kcal mol}^{-1}$  (see Table S14).

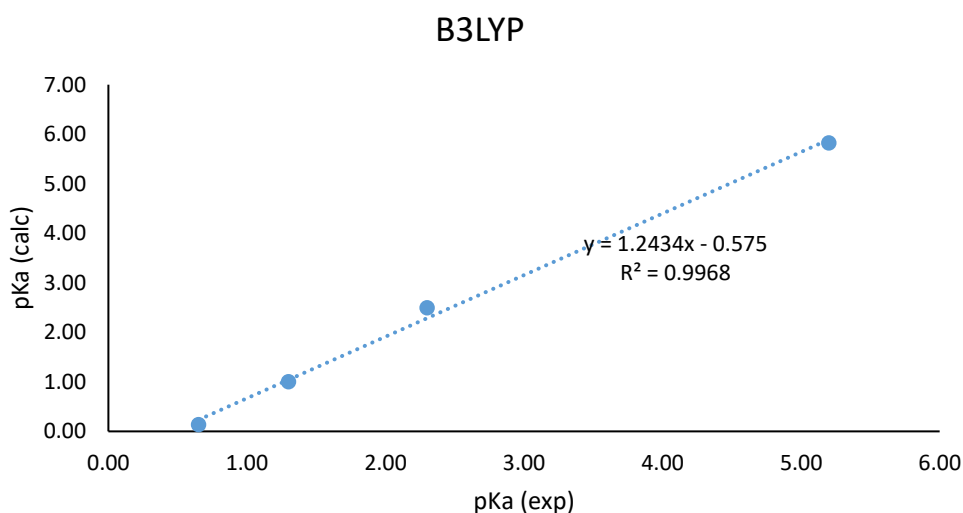

Figure S49: Plot of calculated pKa (B3LYP/D3BJ/TZVPP/CPCM(water)) against the experimental pKa obtained from Joule and Mills,<sup>15</sup> for the four unsubstituted parent azine heterocycles. This has the lowest standard error.



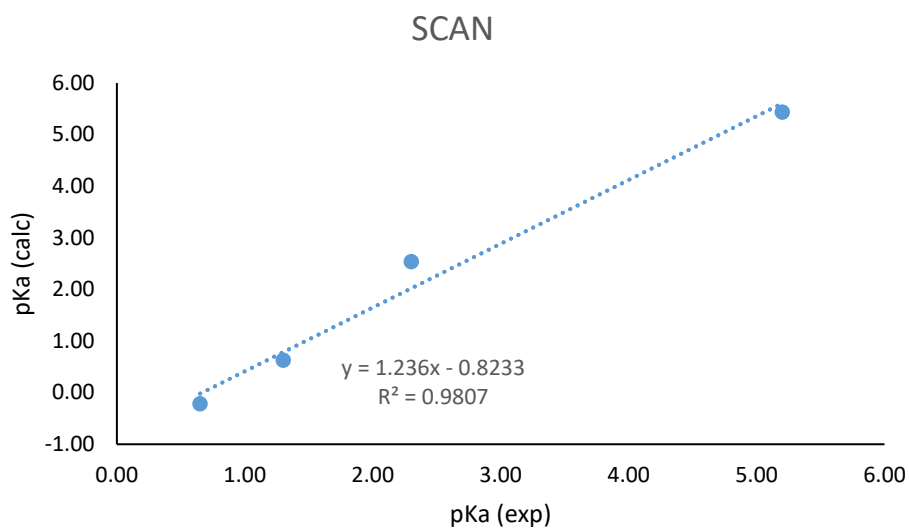

Figure S50: Plot of calculated pKa (SCAN/D3BJ/TZVPP/CPCM(water)) against the experimental pKa obtained from Joule and Mills,<sup>15</sup> for the four unsubstituted parent azine heterocycles.

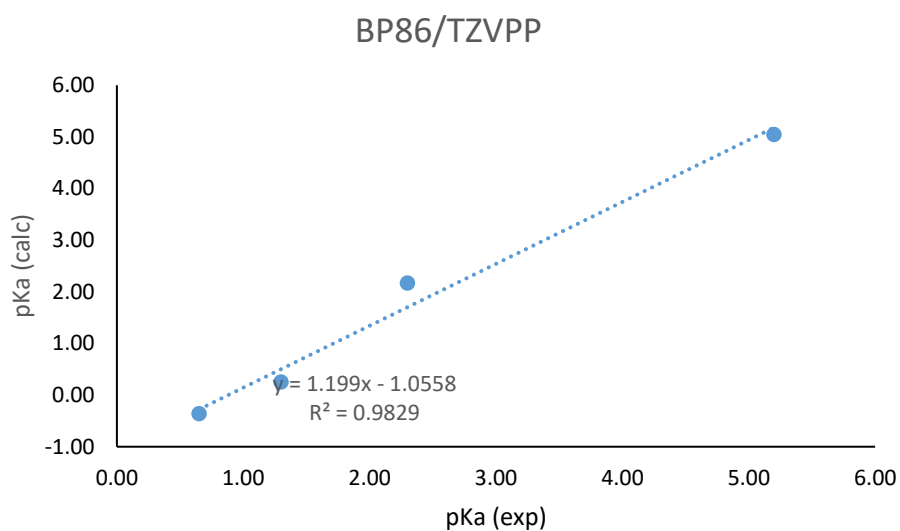

Figure S51: Plot of calculated pKa (BP86/D3BJ/TZVPP/CPCM(water)) against the experimental pKa obtained from Joule and Mills,<sup>15</sup> for the four unsubstituted parent azine heterocycles.

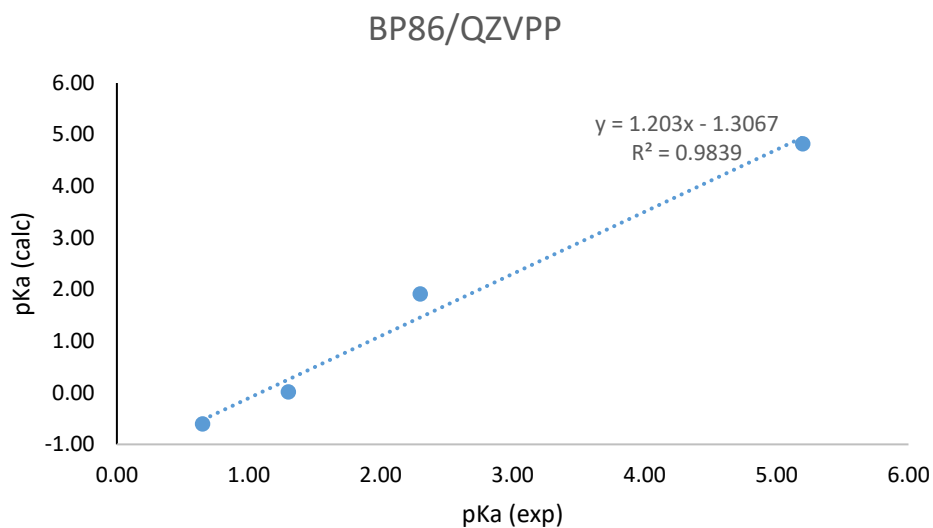

Figure S52: Plot of calculated pKa (BP86/D3BJ/QZVPP/CPCM(water)) against the experimental pKa obtained from Joule and Mills,<sup>15</sup> for the four unsubstituted parent azine heterocycles.

Table S14: Tabulated data obtained from the DFT calculations on the unsubstituted parent azine heterocycles, along with the experimental values observed.<sup>15</sup> B3LYP had the lowest standard error, so the average  $G_{aq}(H^+) = -269.820$  kcal mol<sup>-1</sup> (blue text below), is used in the subsequent calculations (see below).

|            | pKa(exp)<br>ref <sup>15</sup> | B3LYP                              |                 |                              | SCAN                               |                |                              | BP86                               |                |                              | BP86 QZVPP                         |                |                              |
|------------|-------------------------------|------------------------------------|-----------------|------------------------------|------------------------------------|----------------|------------------------------|------------------------------------|----------------|------------------------------|------------------------------------|----------------|------------------------------|
|            |                               | G_aq(H+)<br>kcal mol <sup>-1</sup> | pKa(calc)       | Abs<br>error<br>pKa<br>units | G_aq(H+)<br>kcal mol <sup>-1</sup> | pKa(calc)      | Abs<br>error<br>pKa<br>units | G_aq(H+)<br>kcal mol <sup>-1</sup> | pKa(calc)      | Abs<br>error<br>pKa<br>units | G_aq(H+)<br>kcal mol <sup>-1</sup> | pKa(calc)      | Abs<br>error<br>pKa<br>units |
| pyridine   | 5.20                          | -270.414                           | 5.64            | 0.44                         | -269.891                           | 5.25           | 0.05                         | -269.357                           | 4.86           | 0.34                         | -269.048                           | 4.63           | 0.57                         |
| pyridazine | 2.30                          | -269.834                           | 2.31            | 0.01                         | -269.898                           | 2.36           | 0.06                         | -269.387                           | 1.98           | 0.32                         | -269.038                           | 1.73           | 0.57                         |
| pyrimidine | 1.30                          | -269.156                           | 0.81            | 0.49                         | -268.647                           | 0.44           | 0.86                         | -268.142                           | 0.07           | 1.23                         | -267.815                           | -0.17          | 1.47                         |
| pyrazine   | 0.65                          | -268.866                           | -0.05           | 0.70                         | -268.384                           | -0.40          | 1.05                         | -268.189                           | -0.55          | 1.20                         | -267.855                           | -0.79          | 1.44                         |
|            |                               |                                    | <b>average</b>  | <b>MAE</b>                   |                                    | <b>average</b> | <b>MAE</b>                   |                                    | <b>average</b> | <b>MAE</b>                   |                                    | <b>average</b> | <b>MAE</b>                   |
|            |                               |                                    | <b>-269.820</b> | 0.41                         |                                    | -269.205       | 0.51                         |                                    | -268.769       | 0.77                         |                                    | -268.439       | 1.01                         |

## Ligand Calculations using B3LYP

Following the results gathered in the section above the structures of the free  $L^{\text{azine}}$  ligands were optimised using the B3LYP functional with the TZVPP basis set with an implicit solvent model (CPCM, water). The structures were optimised for both the ligands ( $L^{\text{azine}}$ ) and the protonated ligands ( $HL^{\text{azine}}$ , protonated on the donor N of the azine ring) (Figure S53).

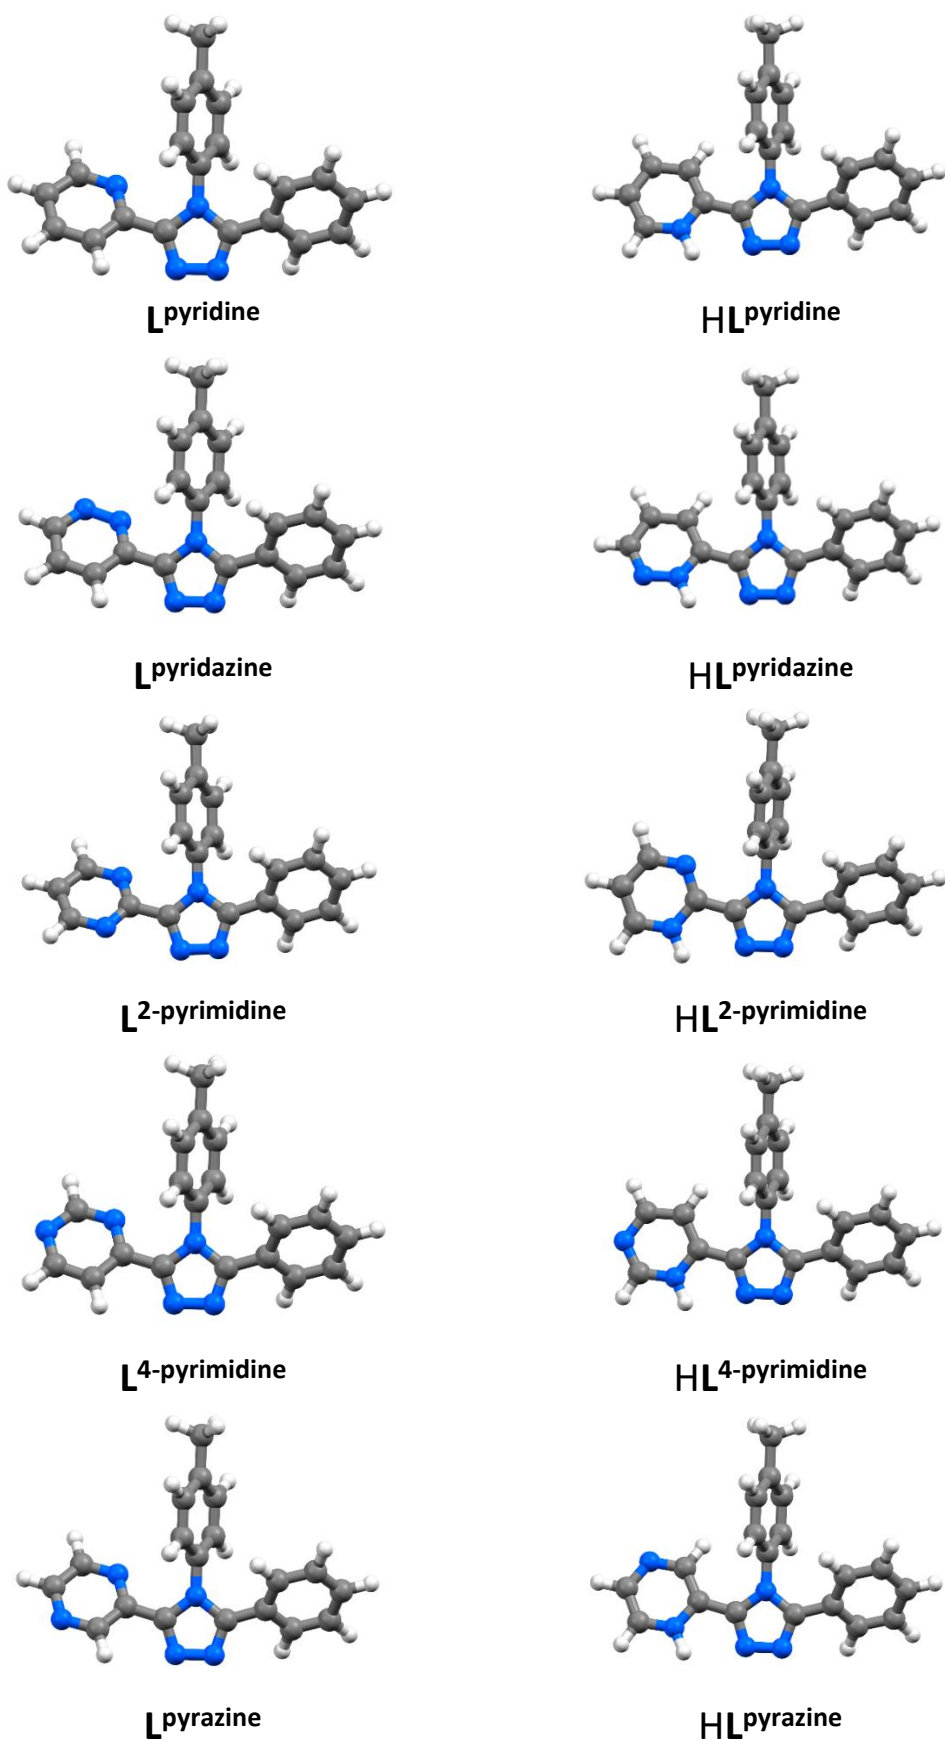

Figure S53: Optimised structures of the **L**<sup>azine</sup> ligands using the B3LYP level of theory.

Using the value obtained for  $G_{aq}(H^+)$  above ( $-269.820 \text{ kcal mol}^{-1}$ ; see Table S14) and the calculated Gibbs free energy of the solvated  $L^{azine}$  and  $HL^{azine}$  (Table S15), we then calculated the  $pK_a$  values of the  $L^{azine}$  ligands (Table S15), using the equation below (introduced above, page S34).

$$pK_a = \frac{1}{RT \ln 10} \times (G_{aq}(H^+) - G_{aq}(HA) + G_{aq}(A^-))$$

The plot of calculated  $pK_a$  of the  $L^{azine}$  ligand, versus experimentally determined redox potential of the tris- $L^{azine}$  complex (Figure S54) shows a strong linear correlation ( $R^2 = 0.98$  for the Ru complexes,  $R^2 = 0.99$  for the Fe complexes).

Table S15:  $pK_a$  values calculated for the  $L^{azine}$  ligands with the B3LYP/D3BJ/CPCM(water) level of theory.

| azine       | $G_{aq}(AH^+)$ |                        | $G_{aq}(A)$ |                        | $pK_a(\text{calc})$ |
|-------------|----------------|------------------------|-------------|------------------------|---------------------|
|             | a.u.           | kcal mol <sup>-1</sup> | a.u.        | kcal mol <sup>-1</sup> |                     |
| pyridine    | -990.808       | -621741                | -990.368    | -621466                | 4.980215            |
| pyridazine  | -1006.82       | -631790                | -1006.39    | -631520                | 1.281749            |
| 2pyrimidine | -1006.85       | -631810                | -1006.42    | -631539                | 1.525504            |
| 4pyrimidine | -1006.85       | -631810                | -1006.42    | -631540                | 0.738327            |
| pyrazine    | -1006.84       | -631803                | -1006.42    | -631535                | -0.66399            |

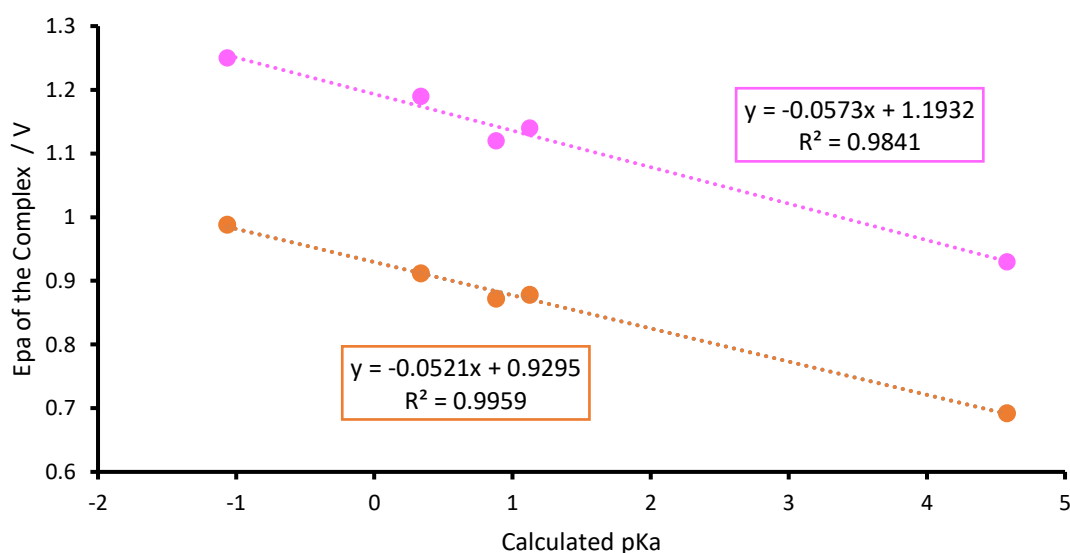

Figure S54: Plot of experimentally determined  $E_{pa}(Ru^{III/II})$  for the tris- $L^{azine}$  complex versus the calculated  $L^{azine}$  ligand  $pK_a$  using the B3LYP/D3BJ/CPCM(water) level of theory.

## NMR Spectra of the Complexes

Note that all  $^1\text{H}$  NMR integrations shown in these spectra are based on the tolyl  $\text{CH}_3$  signal being set to 9H (as one complex has 3 ligands each of which has one tolyl  $\text{CH}_3 = 9\text{H}$ ).

### $[\text{Ru}(\text{L}^{\text{pyridine}})_3](\text{PF}_6)_2$ (**1**)

PROTON\_cd3cn\_01  
MGR26\_3

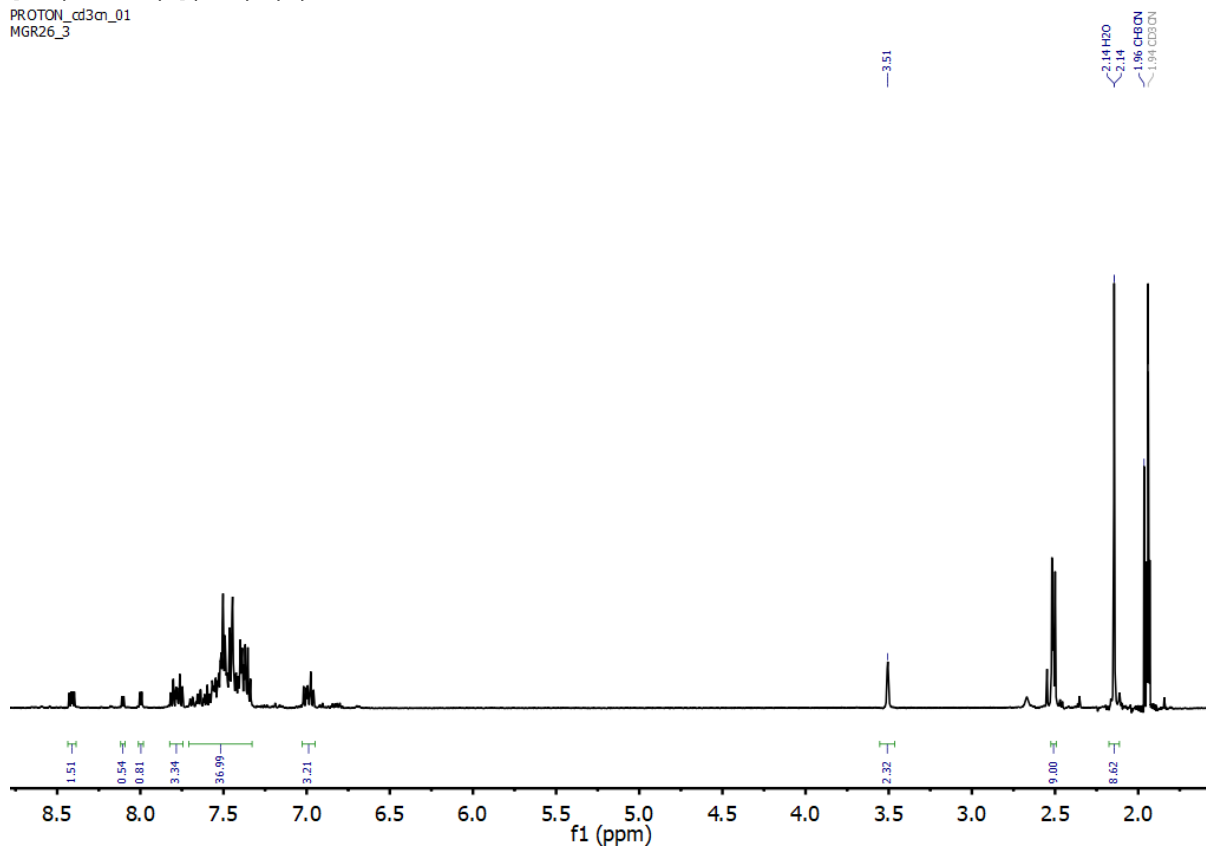

Figure S55:  $^1\text{H}$  NMR (500 MHz, 298 K,  $\text{CD}_3\text{CN}$ ) of complex **1**.

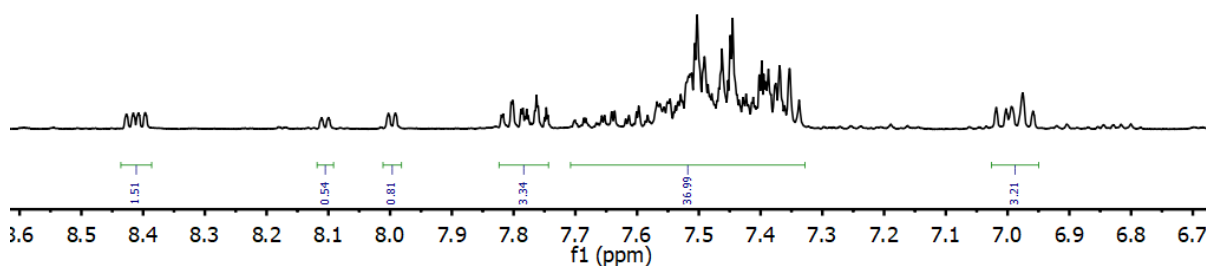

Figure S56: Partial  $^1\text{H}$  NMR (500 MHz, 298 K,  $\text{CD}_3\text{CN}$ ) of complex **1**, focussing on aromatic signals.

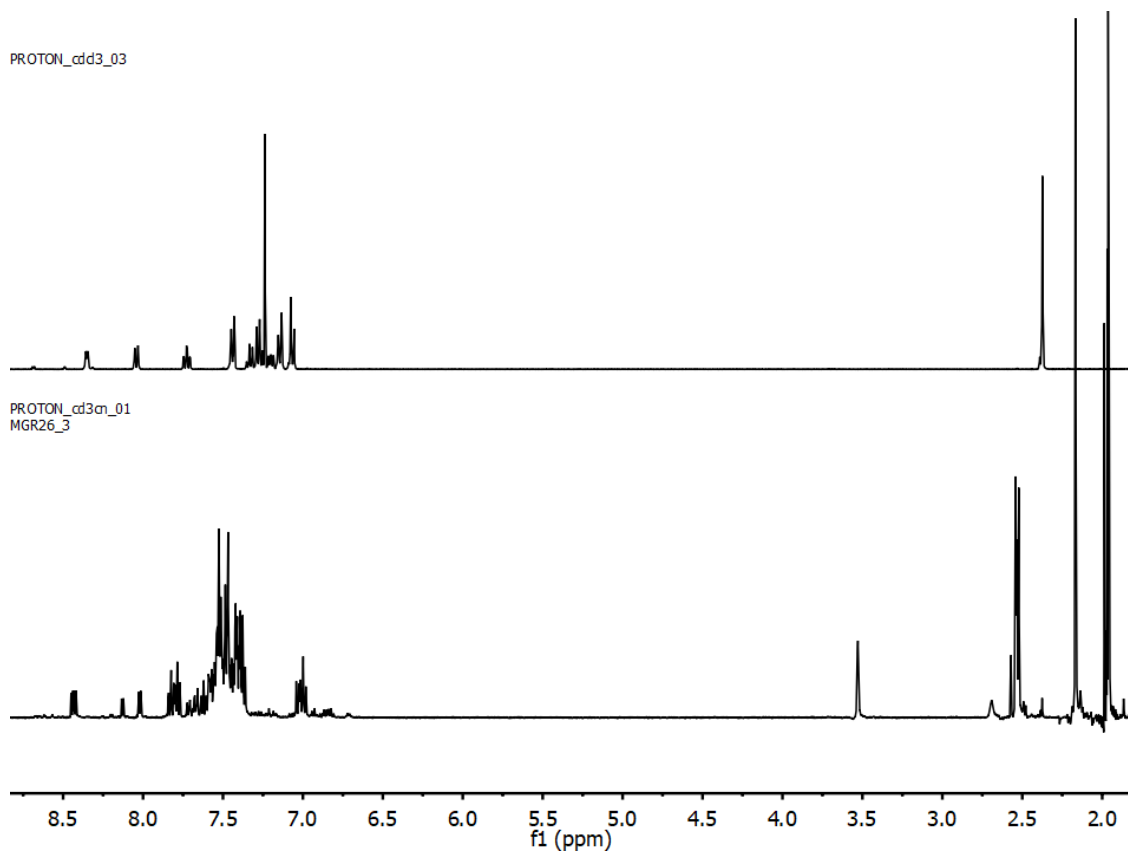

Figure S57: Stacked  $^1\text{H}$  NMR of (top)  $\text{L}^{\text{pyridine}}$  (500 MHz, 298 K,  $\text{CDCl}_3$ ) and (bottom) complex **1** (500 MHz, 298 K,  $\text{CD}_3\text{CN}$ ).

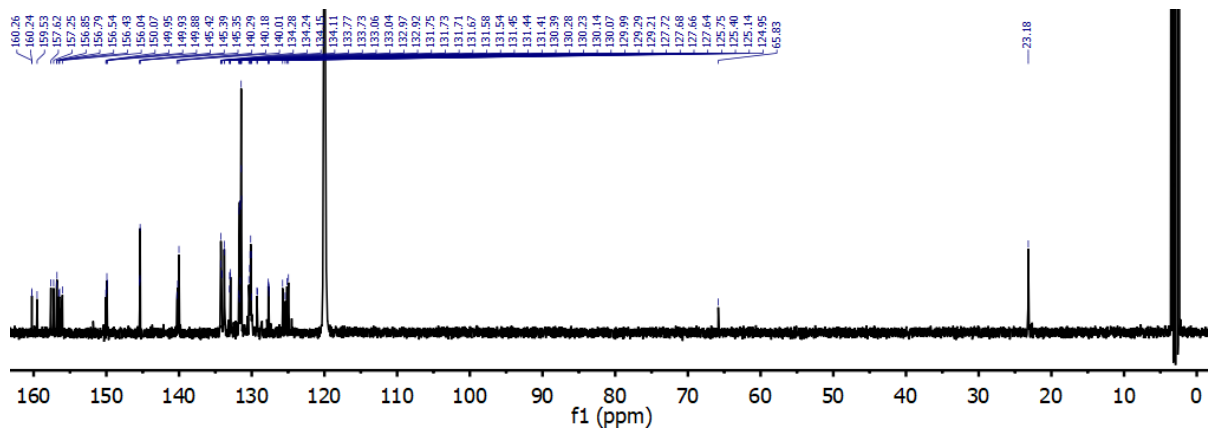

Figure S58:  $^{13}\text{C}$  NMR (125 MHz, 298 K,  $\text{CD}_3\text{CN}$ ) of complex **1**.



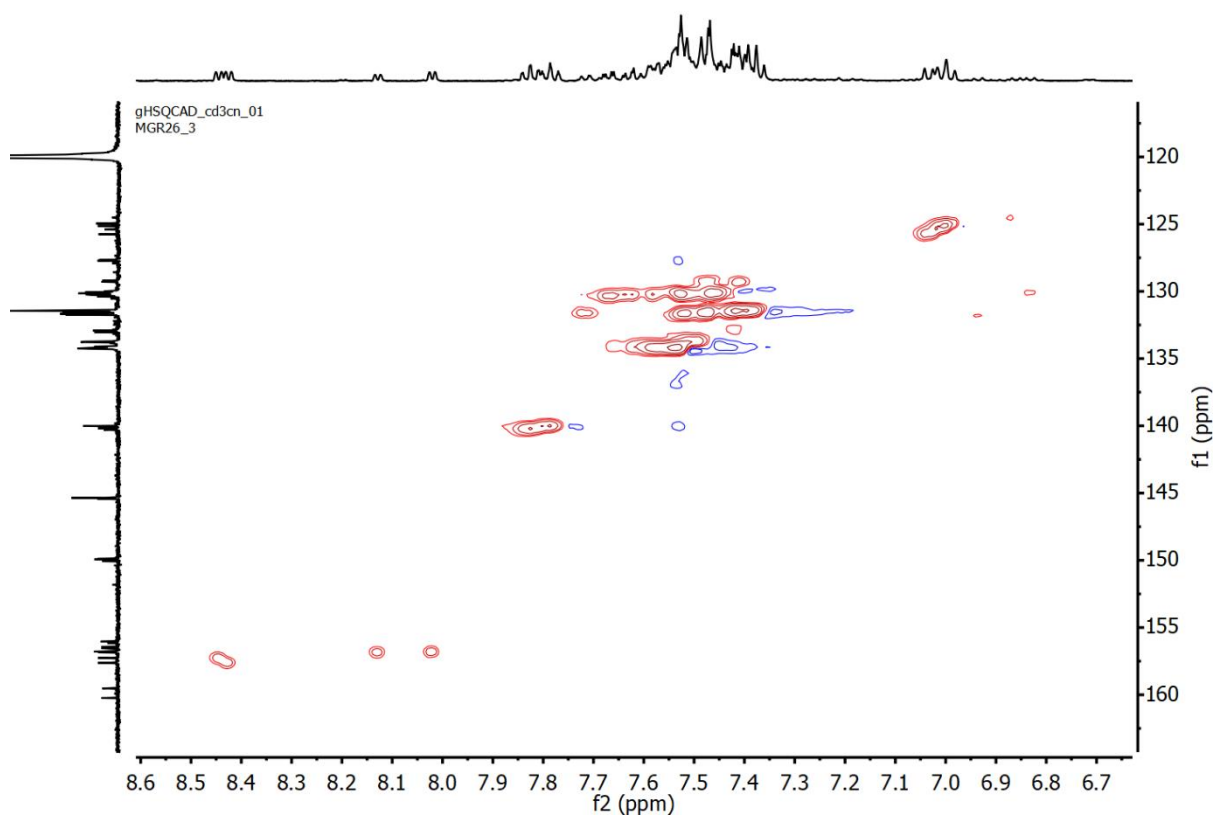

Figure S59: HSQC of complex **1** (298 K, CD<sub>3</sub>CN).

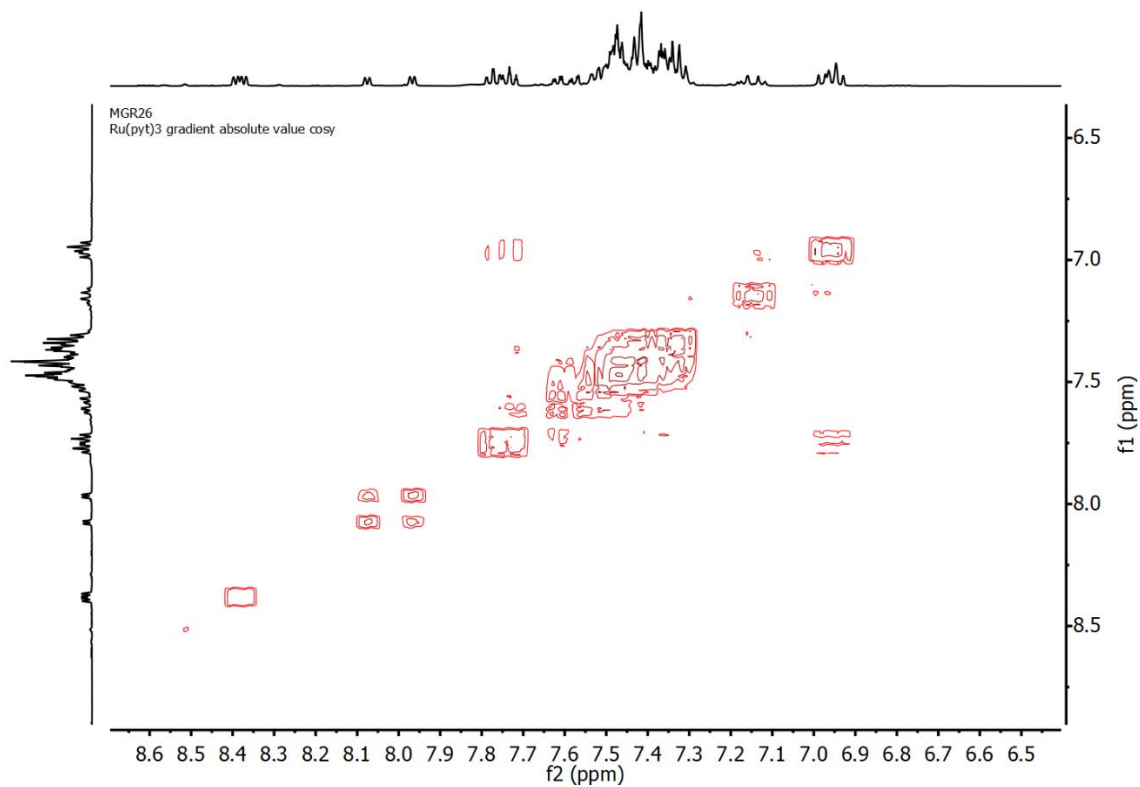

Figure S60: COSY spectrum of complex **1** (298 K, CD<sub>3</sub>CN).

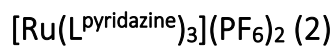

PROTON\_cd3cn\_01

MGR41\_B

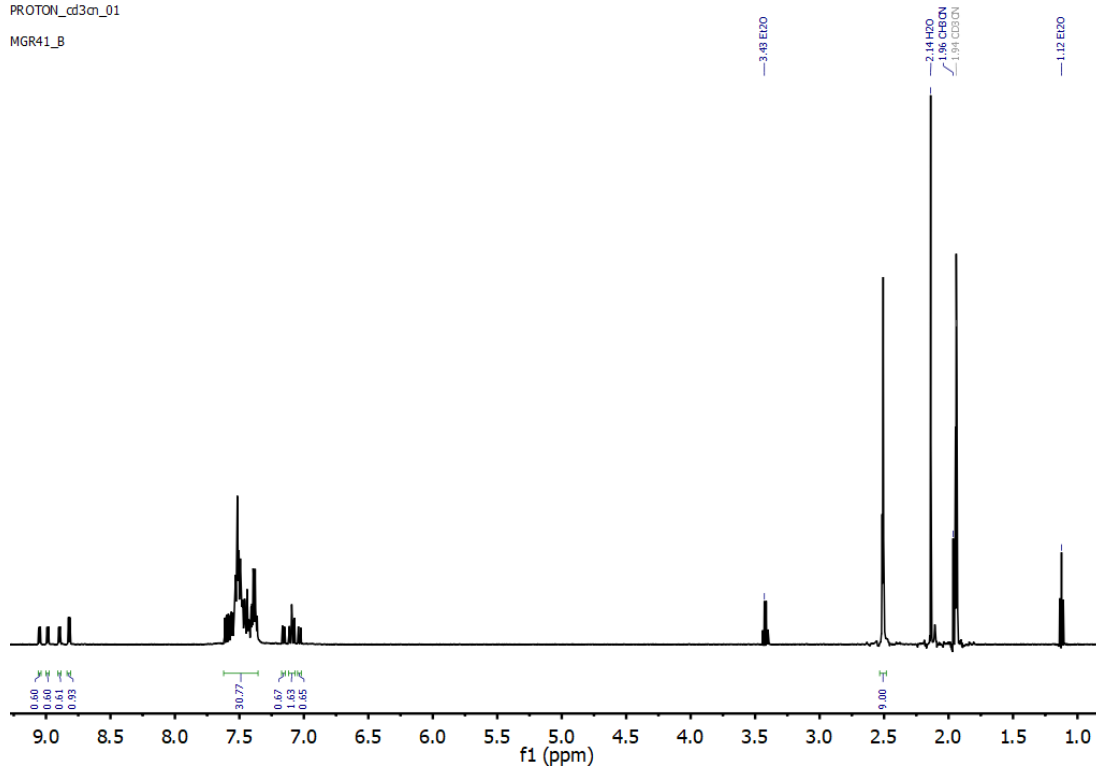

Figure S61: <sup>1</sup>H NMR (500 MHz, 298 K, CD<sub>3</sub>CN) of complex **2**.

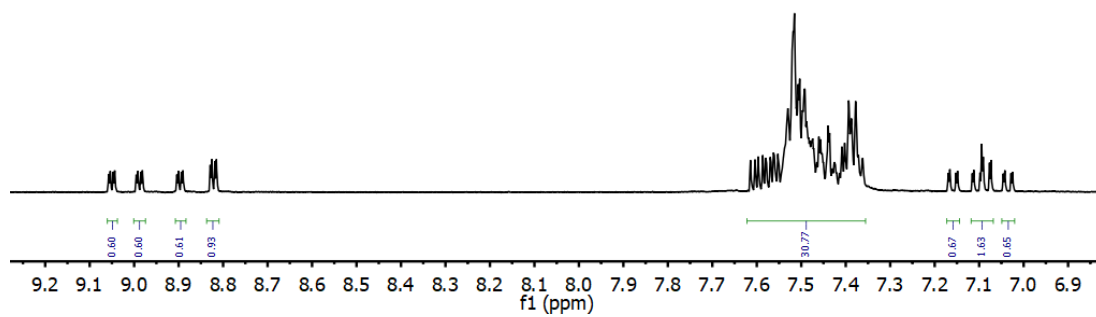

Figure S62: Partial  $^1\text{H}$  NMR (500 MHz, 298 K,  $\text{CD}_3\text{CN}$ ) of complex **2**, focussing on aromatic signals.

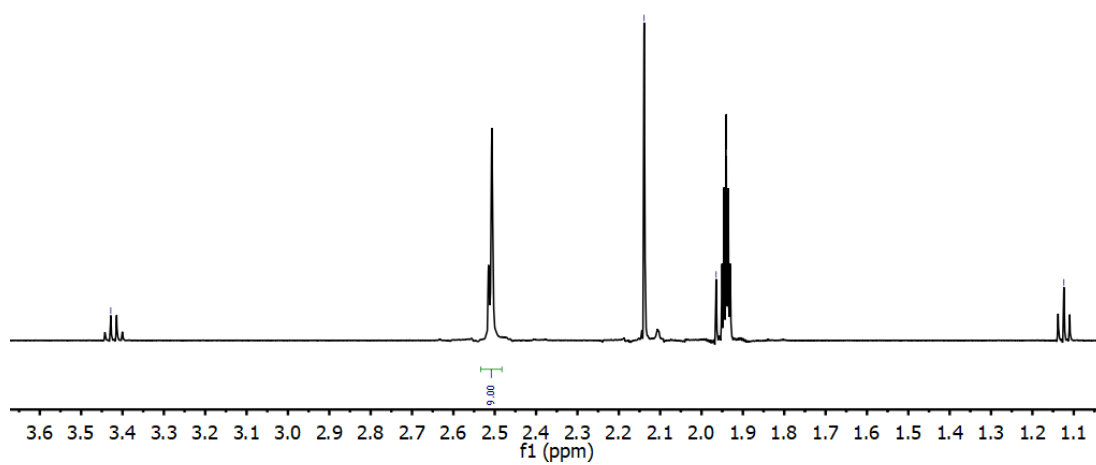

Figure S63: Partial  $^1\text{H}$  NMR (500 MHz, 298 K,  $\text{CD}_3\text{CN}$ ) of complex **2**.

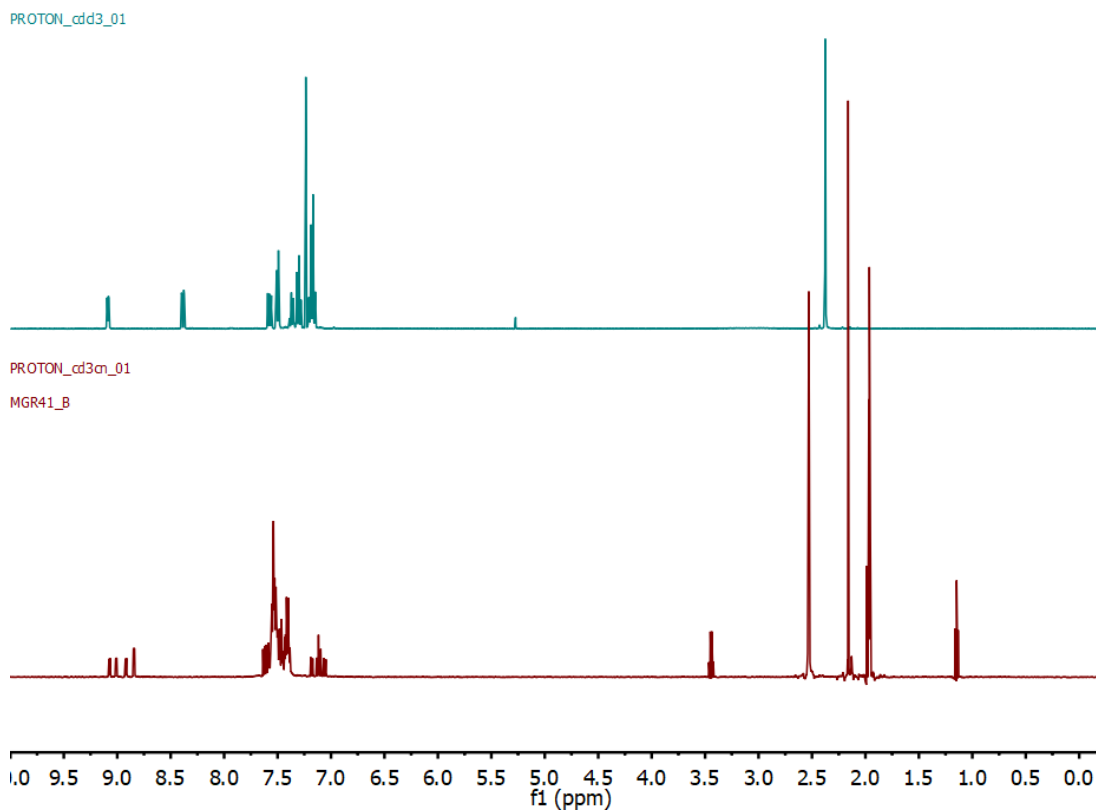

Figure S64: Stacked  $^1\text{H}$  NMR of (top)  $\text{L}^{\text{pyridazine}}$  (500 MHz, 298 K,  $\text{CDCl}_3$ ) and (bottom) complex **2** (500 MHz, 298 K,  $\text{CD}_3\text{CN}$ ).

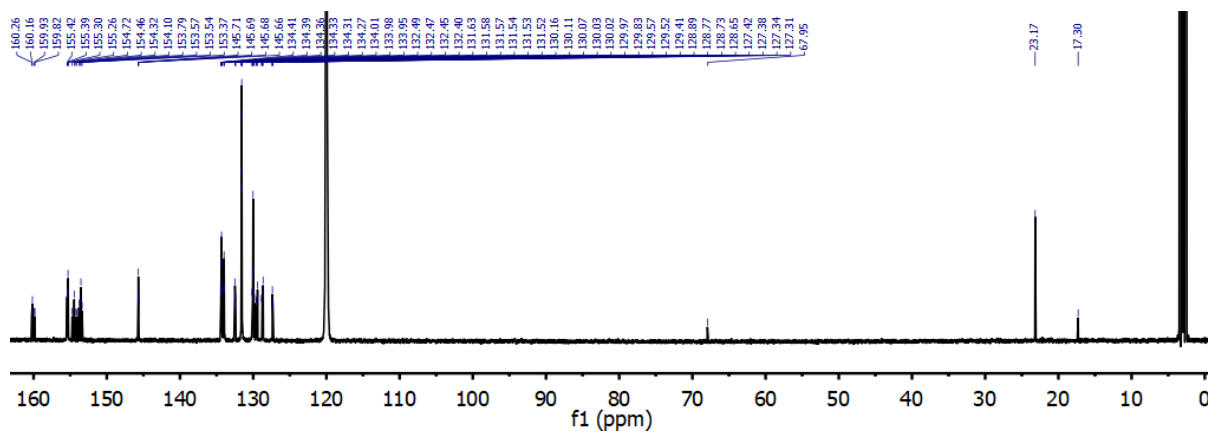

Figure S65:  $^{13}\text{C}$  NMR (125 MHz, 298 K,  $\text{CD}_3\text{CN}$ ) of complex **2**.

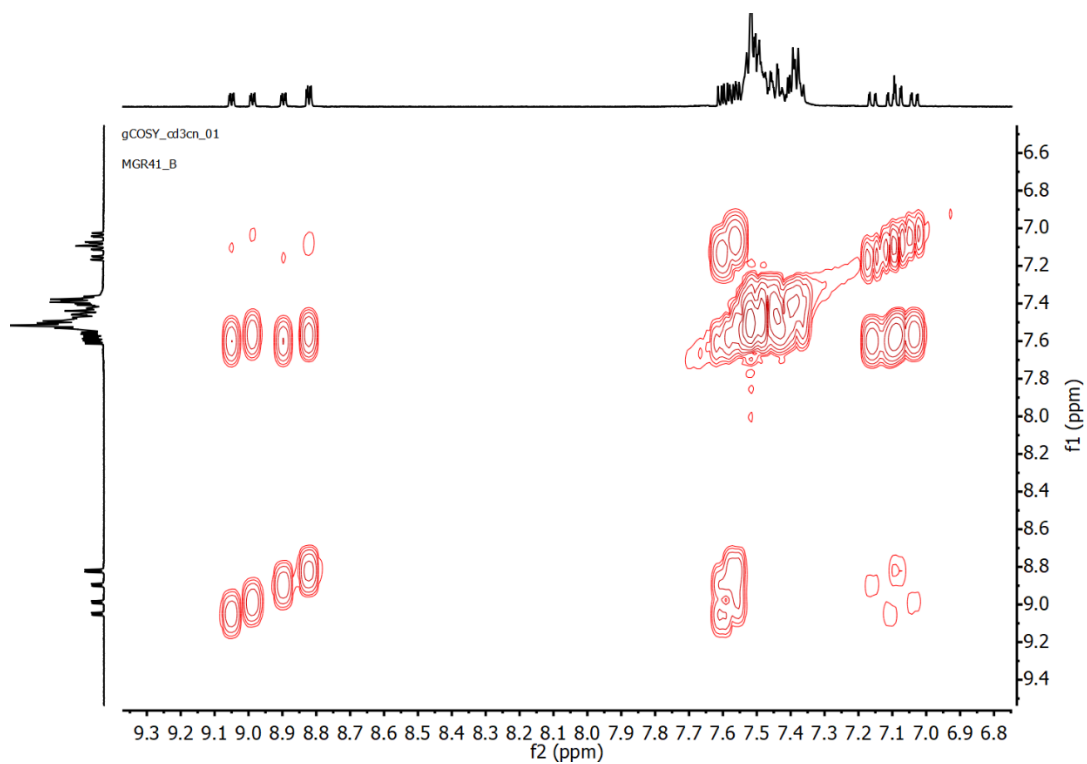

Figure S66: COSY spectrum of **2** (298 K, CD<sub>3</sub>CN).

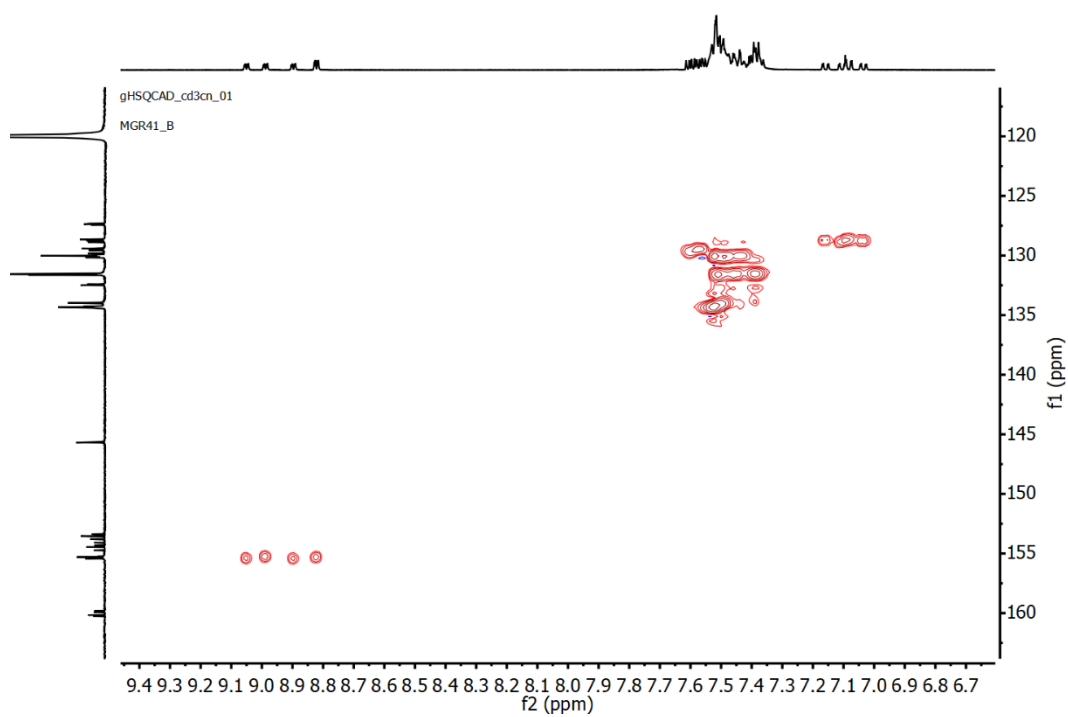

Figure S67: HSQC spectrum of **2** (298 K, CD<sub>3</sub>CN).

[Ru(L<sup>4</sup>-pyrimidine)<sub>3</sub>](PF<sub>6</sub>)<sub>2</sub> (**3**)

PROTON\_cd3cn\_01

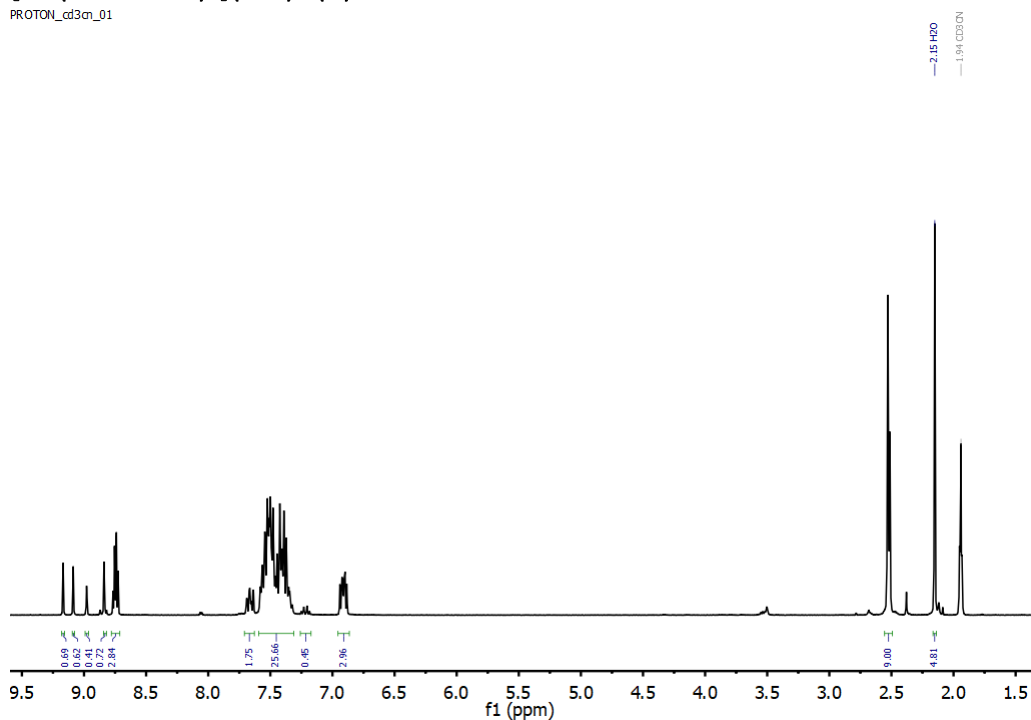

Figure S68: <sup>1</sup>H NMR (500 MHz, 298 K, CD<sub>3</sub>CN) of complex **3**.

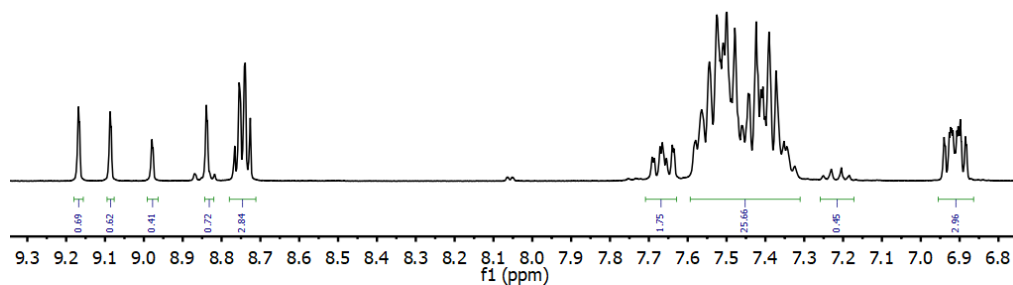

Figure S69: Partial <sup>1</sup>H NMR (500 MHz, 298 K, CD<sub>3</sub>CN) of complex **3**, focussing on aromatic signals.

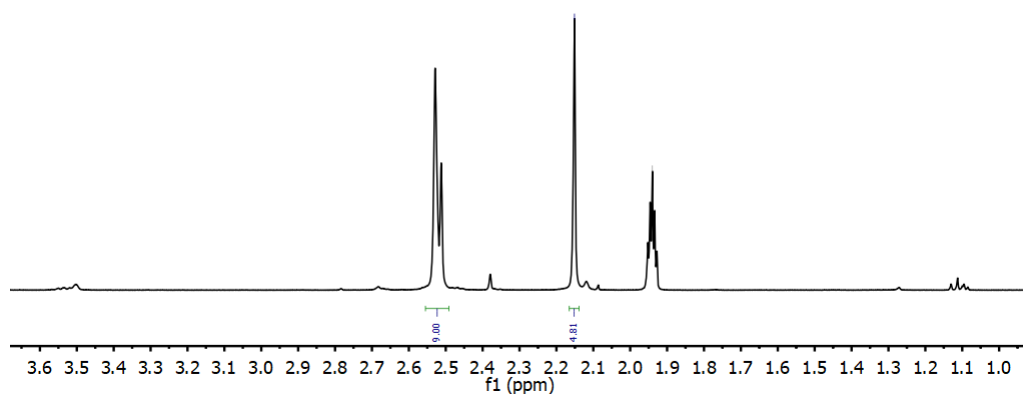

Figure S70: Partial <sup>1</sup>H NMR (500 MHz, 298 K, CD<sub>3</sub>CN) of complex **3**.

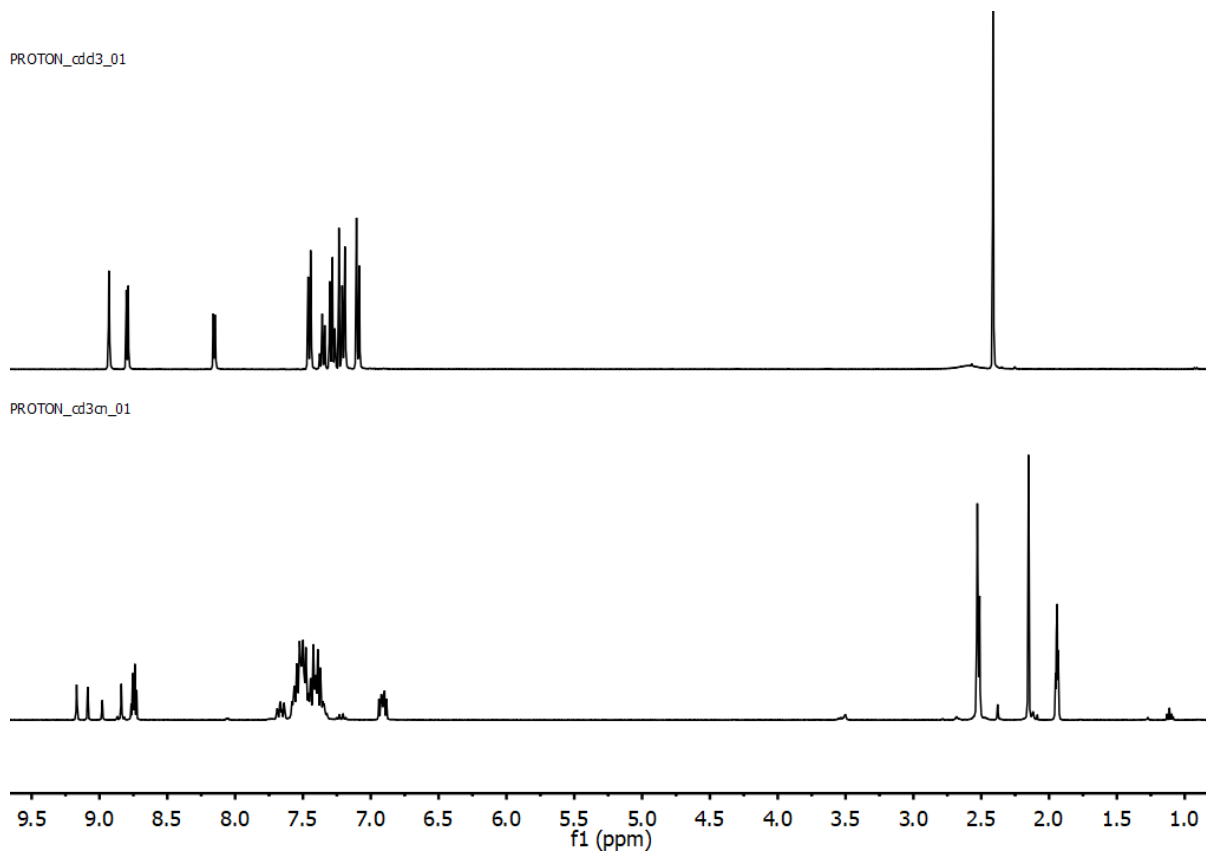

Figure S71: Stacked  $^1\text{H}$  NMR of (top)  $\text{L}^4\text{-pyrimidine}$  (500 MHz, 298 K,  $\text{CDCl}_3$ ) and (bottom) complex **3** (500 MHz, 298 K,  $\text{CD}_3\text{CN}$ ).

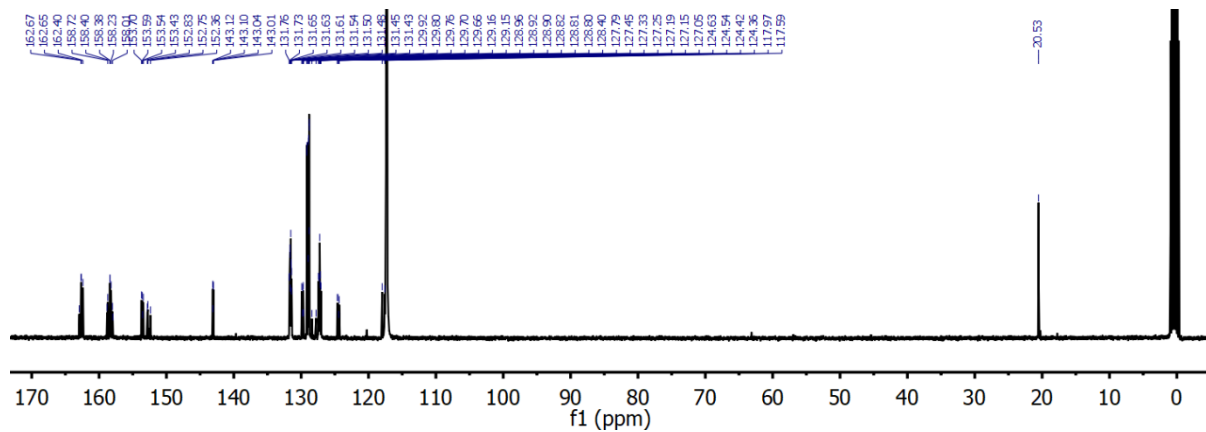

Figure S72:  $^{13}\text{C}$  NMR (125 MHz, 298 K,  $\text{CD}_3\text{CN}$ ) of complex **3**.

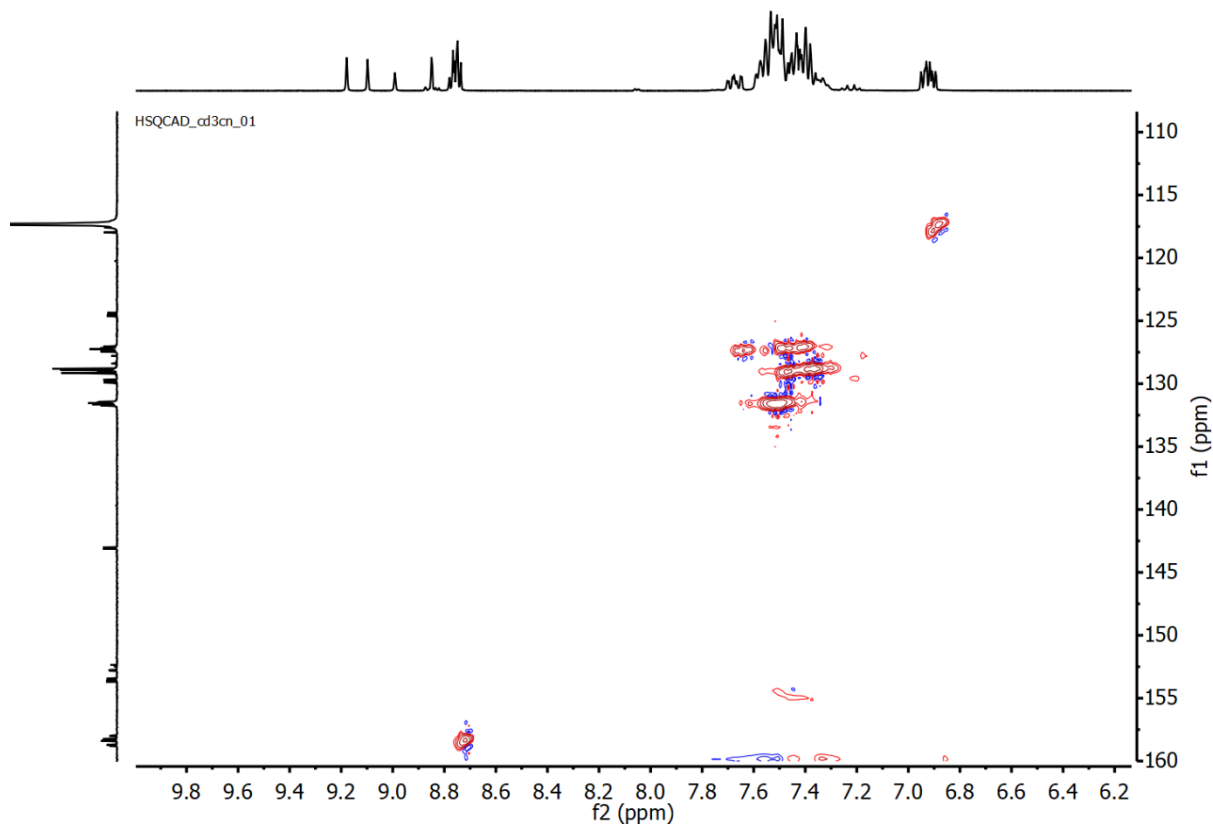

Figure S73: HSQC spectrum of complex **3** (298 K, CD<sub>3</sub>CN).

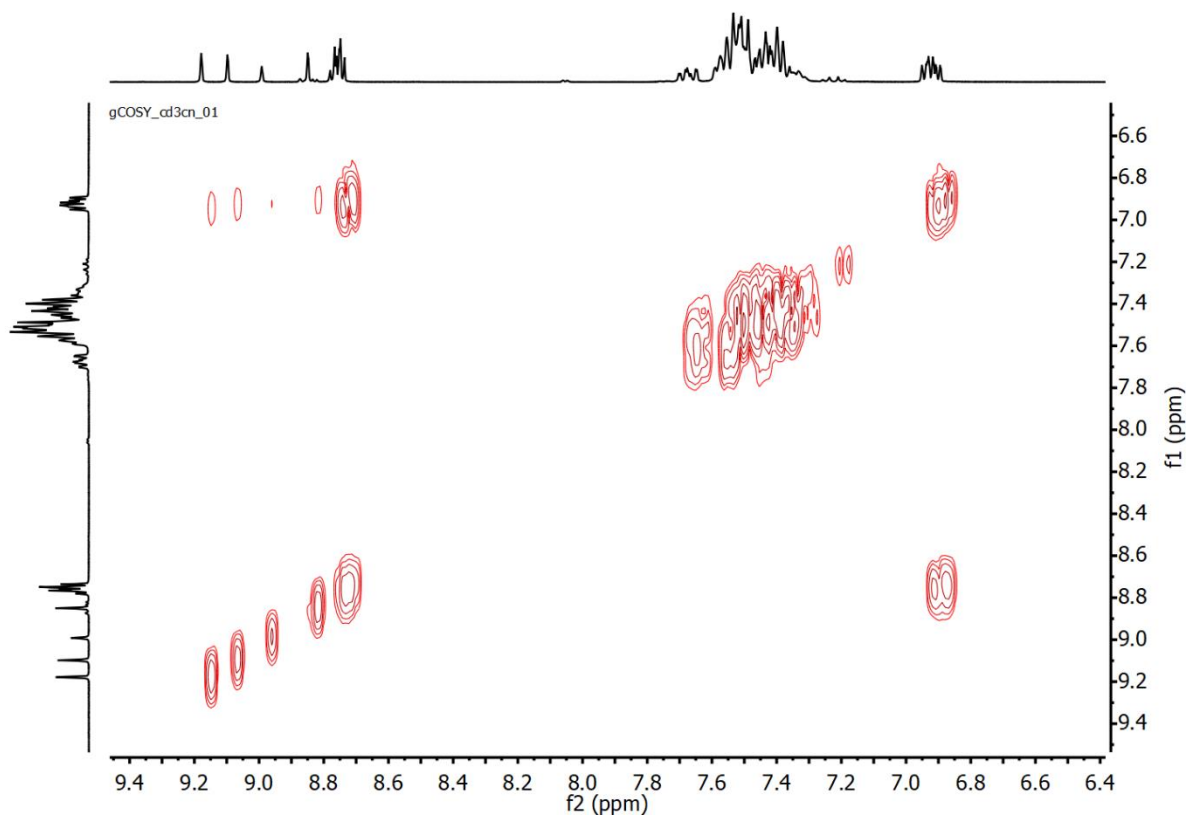

Figure S74: COSY spectrum of complex **3** (298 K, CD<sub>3</sub>CN).



[Ru(L<sup>pyrazine</sup>)<sub>3</sub>](PF<sub>6</sub>)<sub>2</sub> (**4**)

PROTON\_cd3cn\_01

MGR40\_3

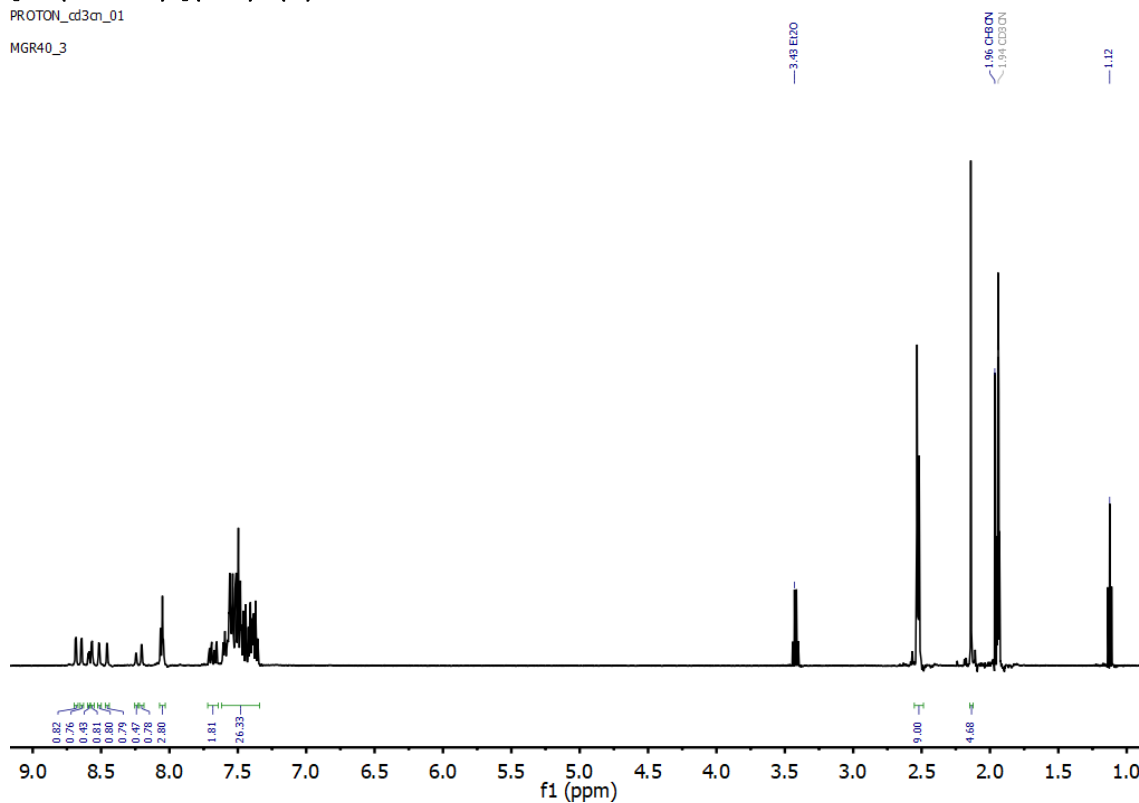

Figure S75: <sup>1</sup>H NMR (500 MHz, 298 K, CD<sub>3</sub>CN) of complex **4**.

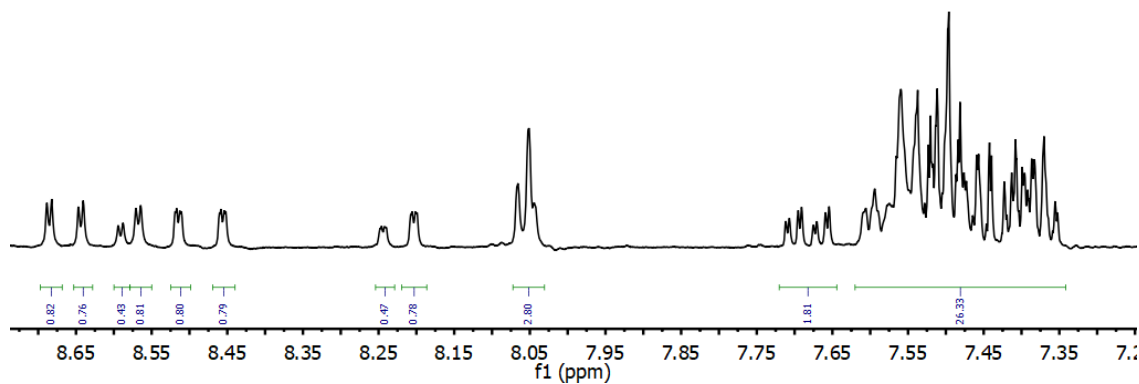

Figure S76: Partial <sup>1</sup>H NMR (500 MHz, 298 K, CD<sub>3</sub>CN) of complex **4**, focussing on aromatic signals.

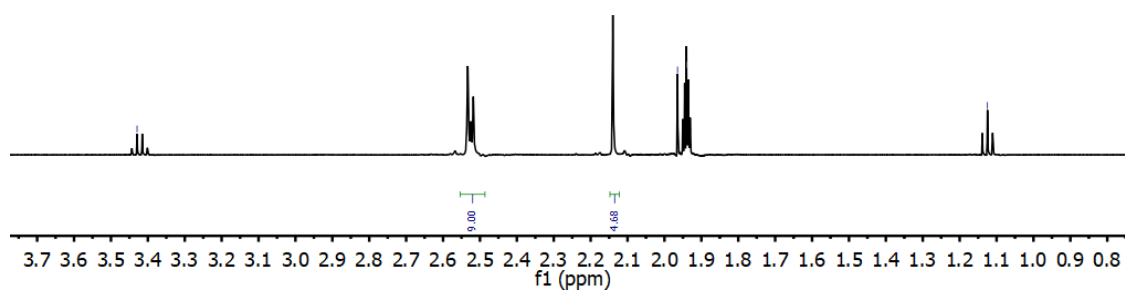

Figure S77: Partial <sup>1</sup>H NMR (500 MHz, 298 K, CD<sub>3</sub>CN) of complex **4**.

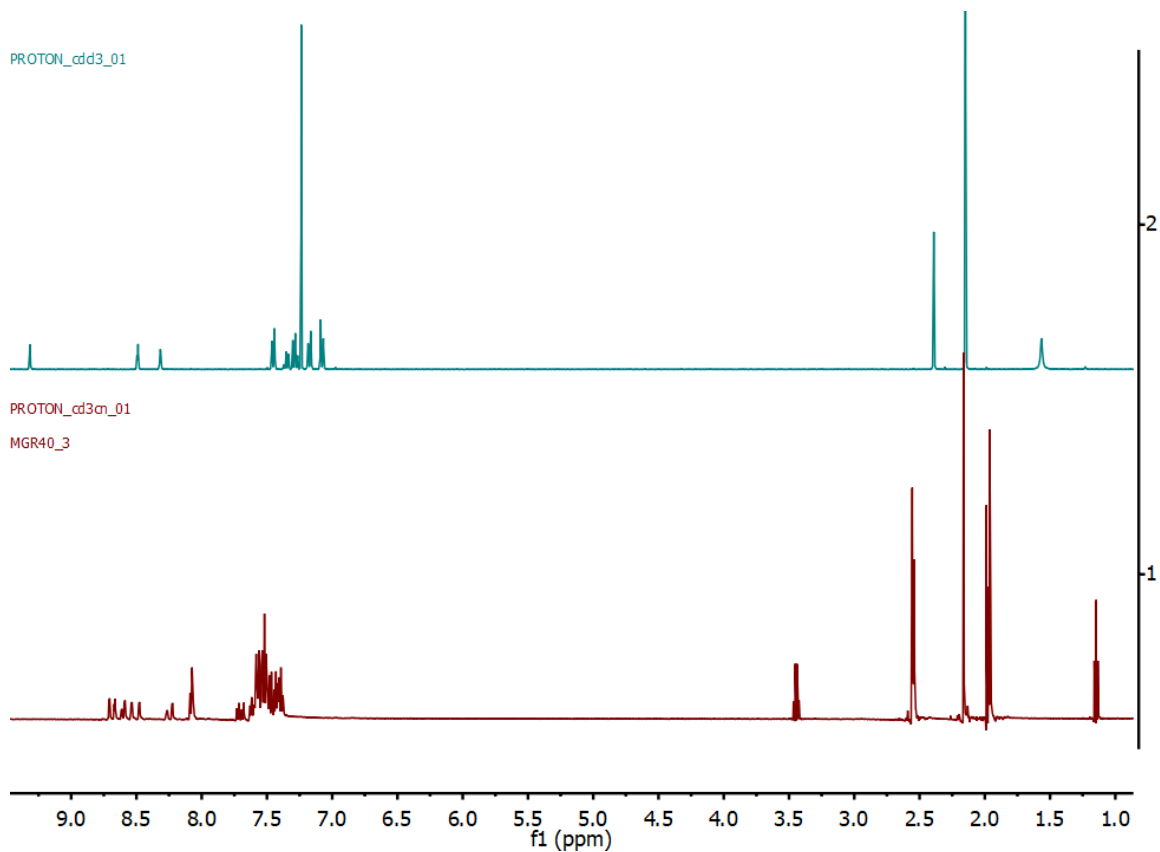

Figure S78: Stacked  $^1\text{H}$  NMR of (top)  $\text{L}^{\text{pyrazine}}$  (500 MHz, 298 K,  $\text{CDCl}_3$ ) and (bottom) complex **4** (500 MHz, 298 K,  $\text{CD}_3\text{CN}$ ).

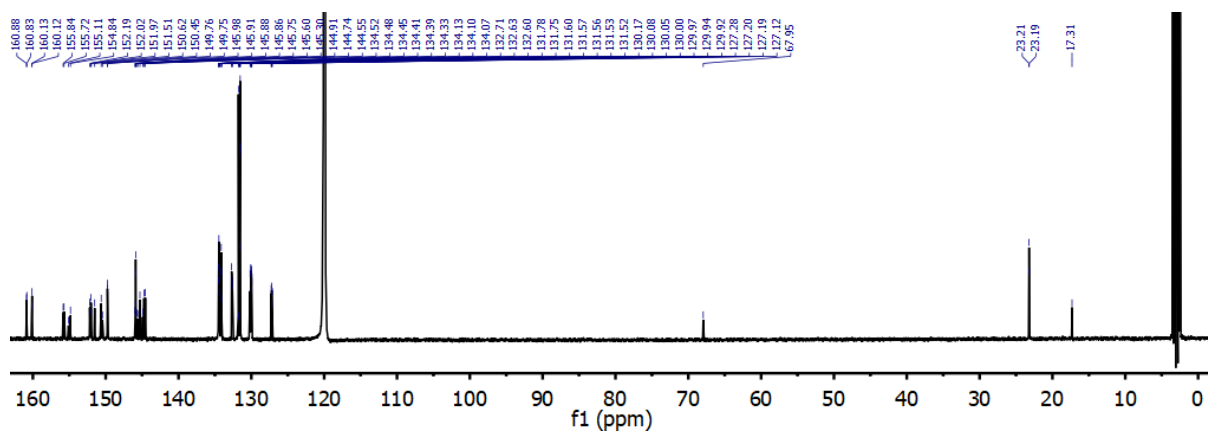

Figure S79:  $^{13}\text{C}$  NMR (125 MHz, 298 K,  $\text{CD}_3\text{CN}$ ) of complex **4**.

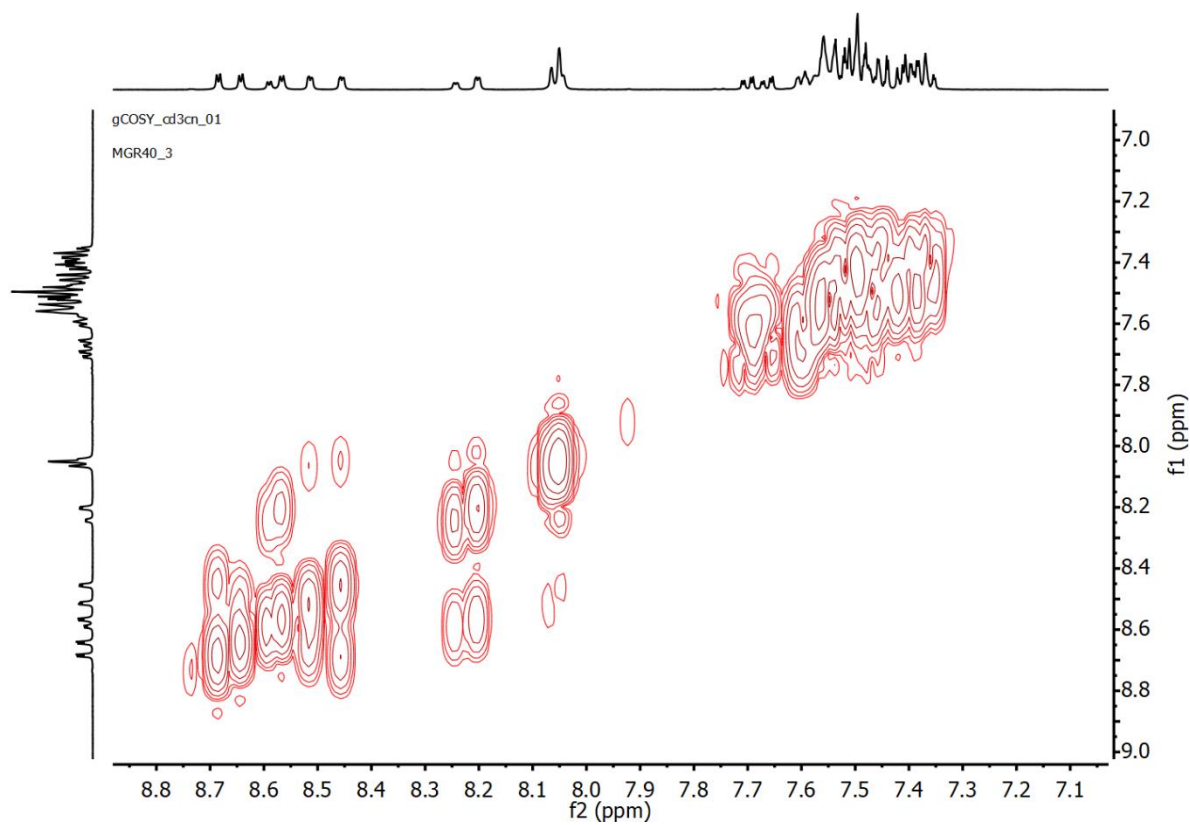

Figure S80: COSY spectrum of complex **4** (298 K, CD<sub>3</sub>CN).

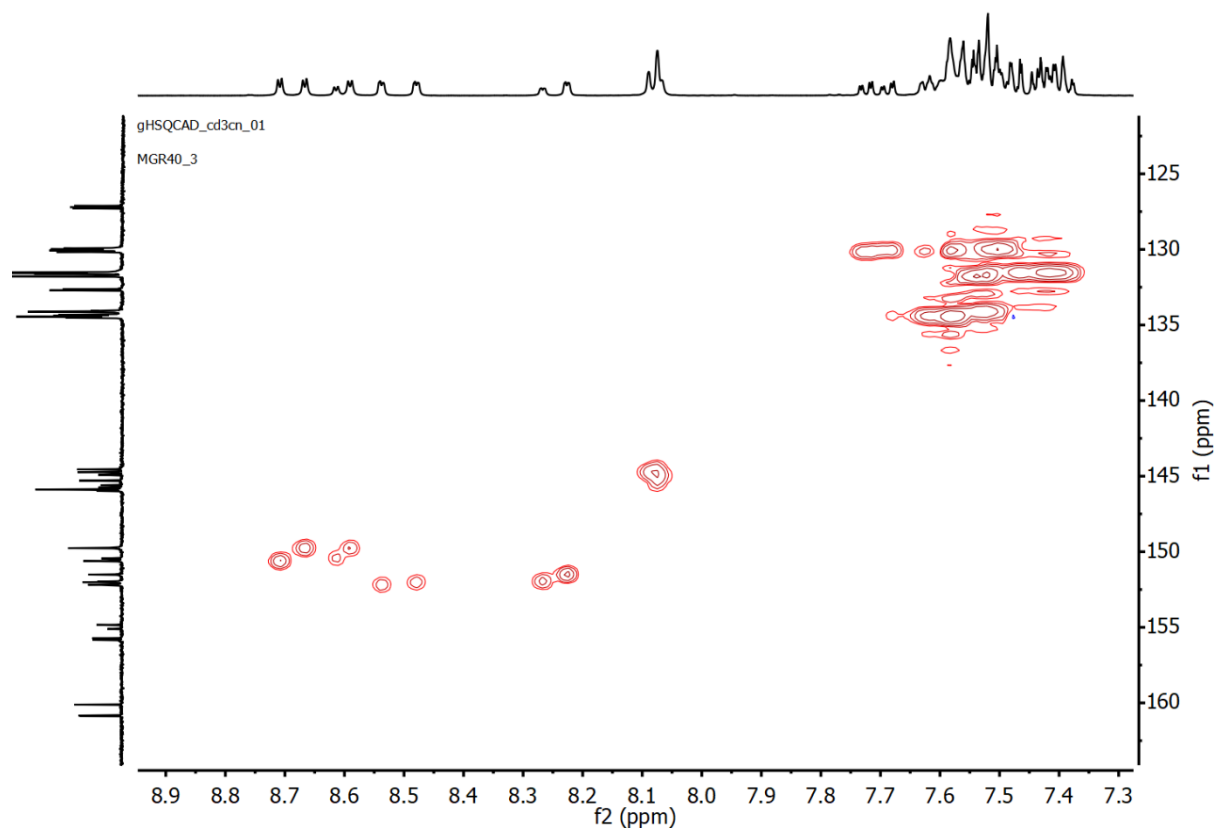

Figure S81: HSQC spectrum of complex **4** (298 K, CD<sub>3</sub>CN).

[Ru(L<sup>2</sup>-pyrimidine)<sub>3</sub>](PF<sub>6</sub>)<sub>2</sub> (5)

PROTON\_cd3cn\_02

MGR39\_3

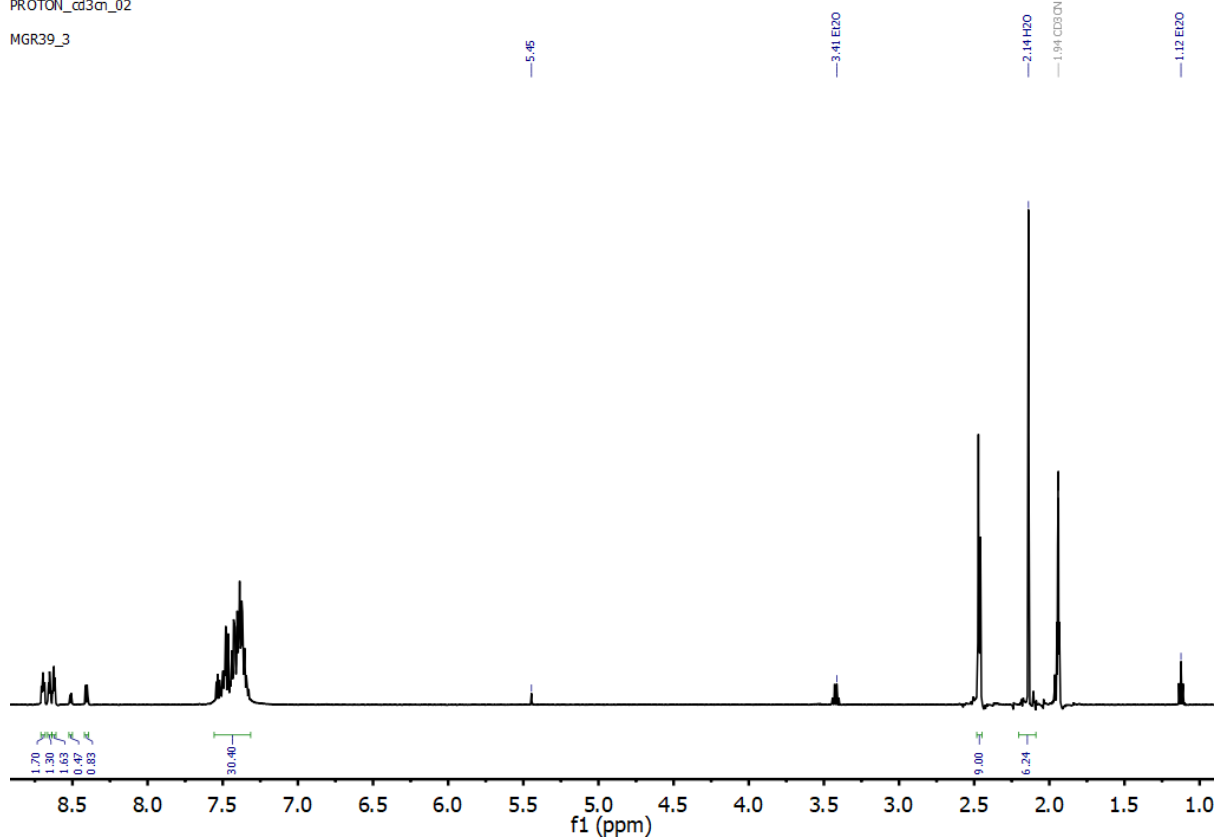

Figure S82: <sup>1</sup>H NMR (500 MHz, 298 K, CD<sub>3</sub>CN) of complex 5.

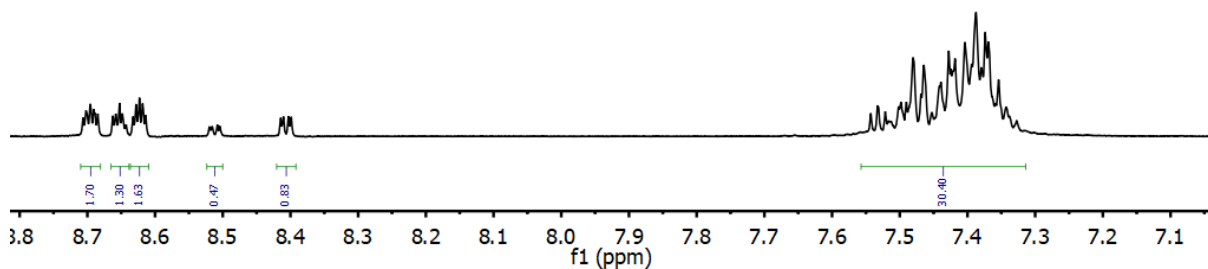

Figure S83: Partial <sup>1</sup>H NMR (500 MHz, 298 K, CD<sub>3</sub>CN) of complex 5, focussing on aromatic signals.

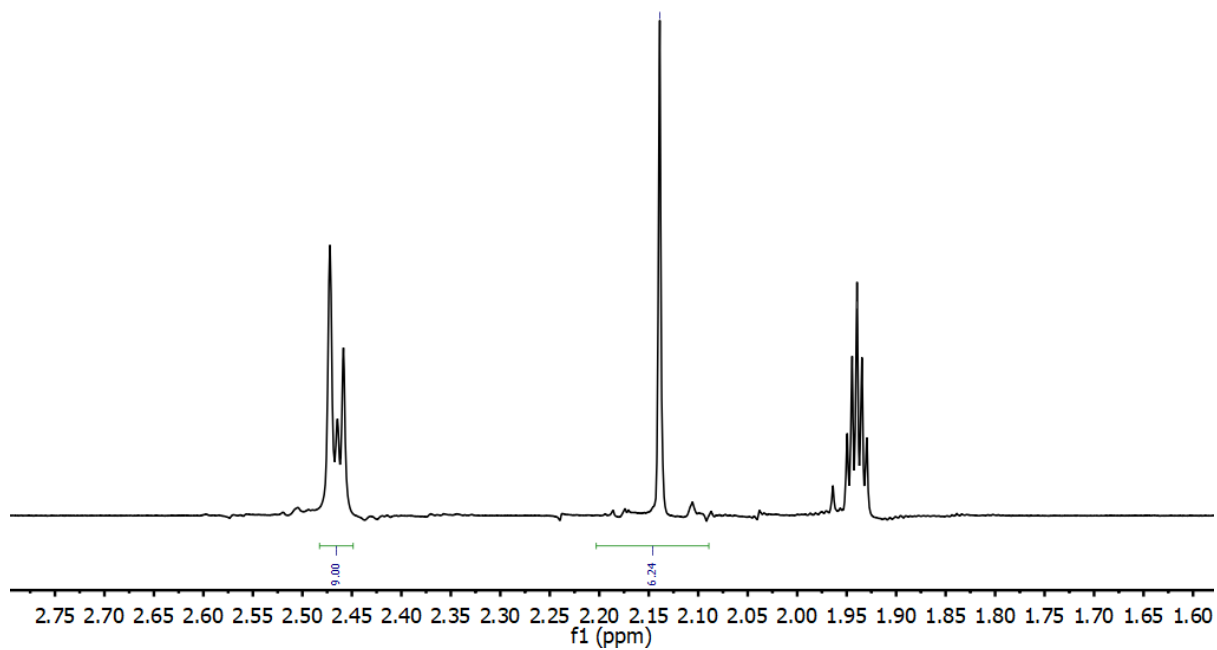

Figure S84: Partial  $^1\text{H}$  NMR (500 MHz, 298 K,  $\text{CD}_3\text{CN}$ ) of complex 5.

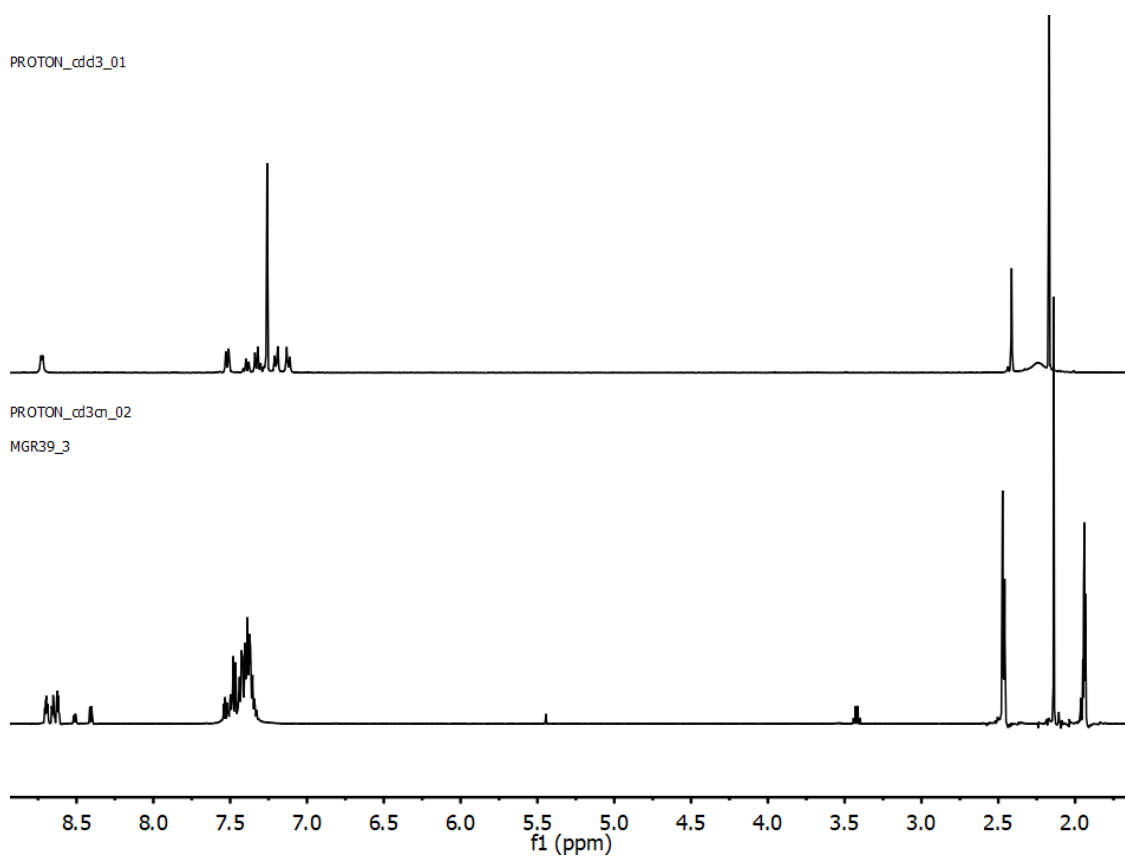

Figure S85: Stacked  $^1\text{H}$  NMR of (top)  $\text{L}^2\text{-pyrimidine}$  (500 MHz, 298 K,  $\text{CDCl}_3$ ) and (bottom) complex 5 (500 MHz, 298 K,  $\text{CD}_3\text{CN}$ ).

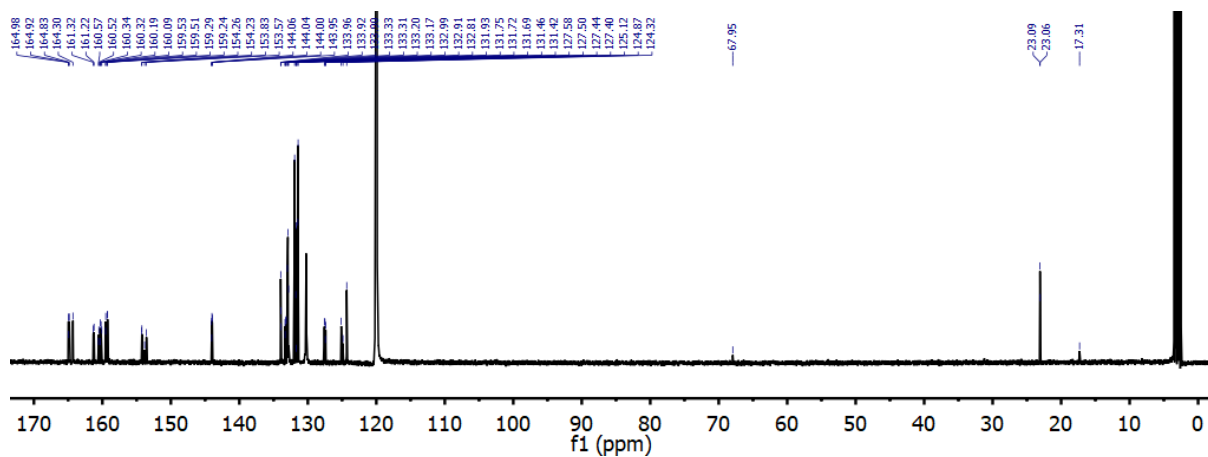

Figure S86:  $^{13}\text{C}$  NMR (125 MHz, 298 K,  $\text{CD}_3\text{CN}$ ) of complex 5.

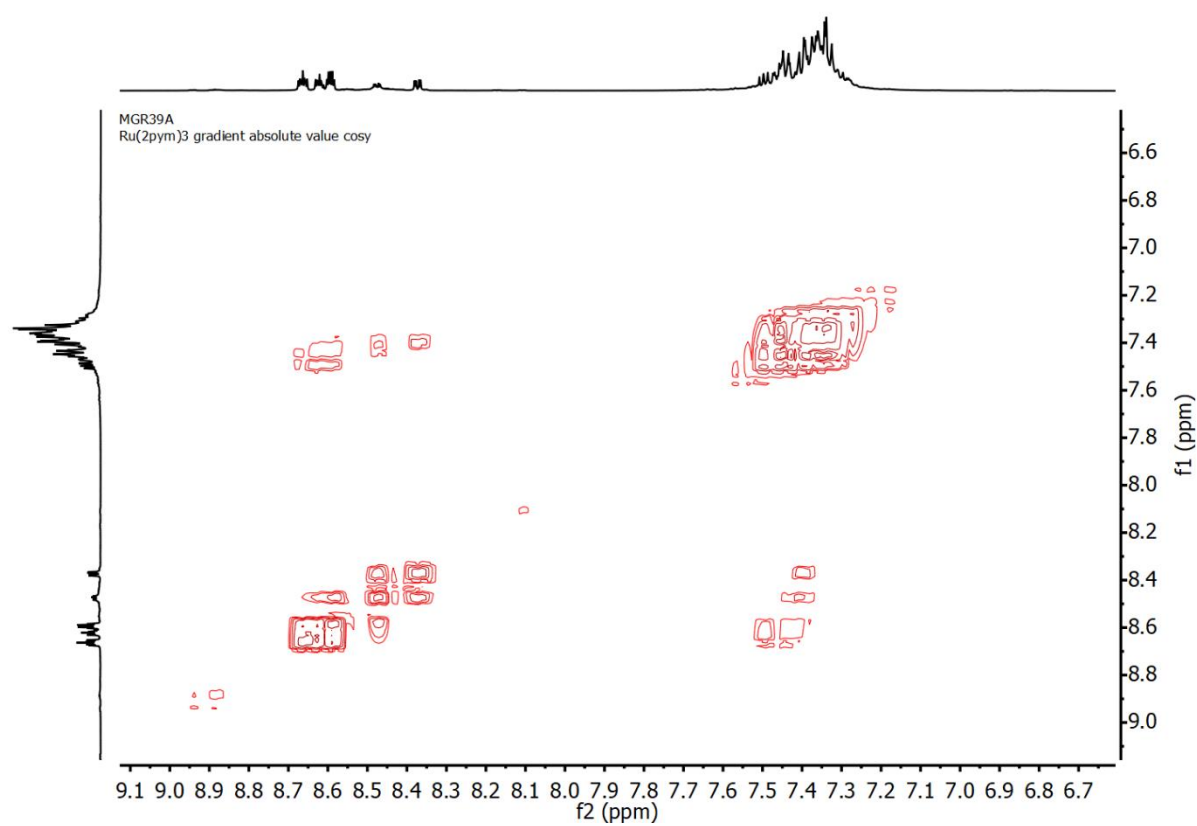

Figure S87: COSY spectrum of complex 5 (298 K,  $\text{CD}_3\text{CN}$ ).

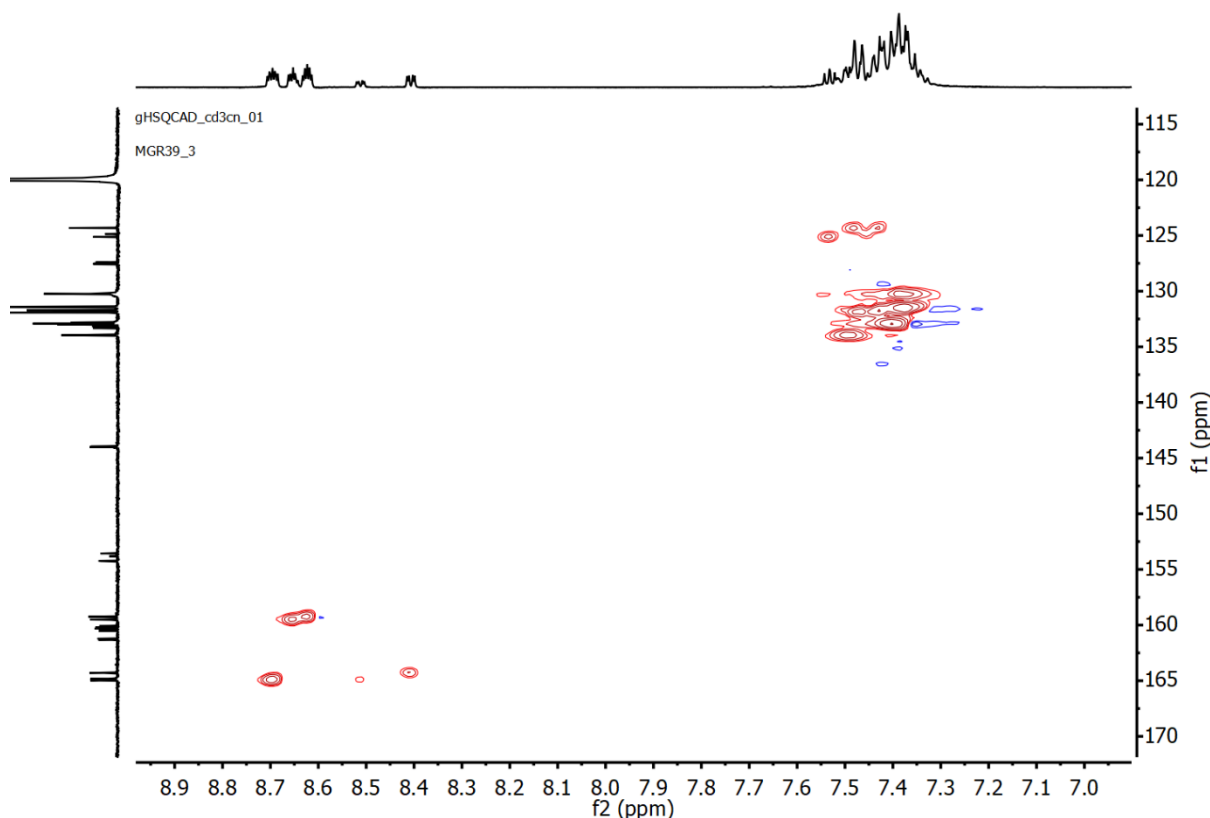

Figure S88: HSQC spectrum of complex **5** (298 K, CD<sub>3</sub>CN).

## References

1. A. Spek, *Acta Cryst. C*, 2015, **71**, 9-18.
2. P. van der Sluis and A. L. Spek, *Acta Crystallogr., Sect. A*, 1990, **46**, 194-201.
3. C. F. Macrae, I. J. Bruno, J. A. Chisolm, P. R. Edgington, P. McCabe, E. Pidcock, L. Rodriguez-Monge, R. Taylor, J. van de Streek and P. A. Wood, *J. Appl. Cryst.*, 2008, **41**, 466-470.
4. S. D. Ernst and W. Kaim, *Inorg. Chem.*, 1989, **28**, 1520-1528.
5. Y. Kawanishi, N. Kitamura and S. Tazuke, *Inorg. Chem.*, 1989, **28**, 2968-2975.
6. K. C. Zheng, J. P. Wang, W. L. Peng, X. W. Liu and F. C. Yun, *J. Mol. Struct.-Theochem.*, 2002, **582**, 1-9.
7. A. D. Becke, *Phys. Rev. A*, 1988, **38**, 3098-3100.
8. J. P. Perdew and W. Yue, *Phys. Rev. B*, 1986, **33**, 8800-8802.
9. S. Grimme, S. Ehrlich and L. Goerigk, *J. Comput. Chem.*, 2011, **32**, 1456-1465.
10. D. Andrae, U. Häußermann, M. Dolg, H. Stoll and H. Preuß, *Theoretica chimica acta*, 1990, **77**, 123-141.
11. F. Weigend and R. Ahlrichs, *Phys. Chem. Chem. Phys.*, 2005, **7**, 3297-3305.
12. Y. Takano and K. N. Houk, *J. Chem. Theory Comput.*, 2005, **1**, 70-77.
13. F. Neese, F. Wennmo, U. Becker and C. Riplinger, *J. Chem. Phys.*, 2020, **152**, 224108.
14. F. R. Dutra, C. d. S. Silva and R. Custodio, *J. Phys. Chem. A*, 2021, **125**, 65-73.
15. J. A. Joule and K. Mills, *Heterocyclic Chemistry*, Blackwell Publishing, Padstow, Cornwall, UK, Fourth Edition edn., 2000.
